# Supplementary material for: The role of IL-6-174 G/C polymorphism and intraocular IL-6 levels in the pathogenesis of ocular diseases: a systematic review and meta-analysis
Source: PubMed Central journal article supplement (PMC7566646; doi:10.1038/s41598-020-74203-9), 2020-10-15
Supplement: 41598_2020_74203_MOESM1_ESM.pdf [file 41598_2020_74203_MOESM1_ESM.pdf]

## Supplemental materials

### **The role of IL-6-174 G/C polymorphism and intraocular IL-6 levels in the pathogenesis of ocular diseases: a systematic review and meta-analysis**

**Zulvikar Syambani Ulhaq<sup>1\*</sup>, Gita Vita Soraya<sup>2</sup>, Budu<sup>3</sup>, Lely Retno Wulandari<sup>4</sup>.**

<sup>1</sup>Department of Biochemistry, Faculty of Medicine and Health Sciences, Maulana Malik Ibrahim State Islamic University of Malang, Batu, East Java, Indonesia.

<sup>2</sup>Department of Biochemistry, Faculty of Medicine, Hasanuddin University, Makassar, South Sulawesi, Indonesia.

<sup>3</sup>Department of Ophthalmology, Faculty of Medicine, Hasanuddin University, Makassar, South Sulawesi, Indonesia.

<sup>4</sup>Department of Ophthalmology, Faculty of Medicine, Brawijaya University, Malang, East Java, Indonesia.

Number of supplementary materials: 10 supplemental tables, 13 supplemental figures, and 1 appendix

**\*Corresponding author:**

Zulvikar Syambani Ulhaq

Department of Biochemistry, Faculty of Medicine and Health Sciences, Maulana Malik Ibrahim State Islamic University of Malang, Batu, East Java, 65151, Indonesia.

Email: [zulhaq@kedokteran.uin-malang.ac.id](mailto:zulhaq@kedokteran.uin-malang.ac.id)

**Supplemental Table S1.** Characteristics of individual studies for the association between IL-6-174 G/C polymorphism and ocular disease

| No.                                        | Study, year                          | Country | Gender (f/m)                                         | Age <sup>a</sup>                                  | Genotype distribution |     |    |         |     |     | P <sub>HWE</sub> <sup>b</sup> |
|--------------------------------------------|--------------------------------------|---------|------------------------------------------------------|---------------------------------------------------|-----------------------|-----|----|---------|-----|-----|-------------------------------|
|                                            |                                      |         |                                                      |                                                   | Case                  |     |    | Control |     |     |                               |
|                                            |                                      |         |                                                      |                                                   | GG                    | GC  | CC | GG      | GC  | CC  |                               |
| <b>Glaucoma</b>                            |                                      |         |                                                      |                                                   |                       |     |    |         |     |     |                               |
| 1                                          | Lin et al, 2014                      | China   | NTG: 123/117<br>Control: 140/122                     | NTG: 63.2 ± 10.2<br>Control: 61.3 ± 11.4          | 231                   | 18  | 0  | 241     | 21  | 0   | 0.499                         |
| 2                                          | Wang et al, 2017                     | Taiwan  | NTG: NA<br>Control: NA                               | NA                                                | 108                   | 20  | 0  | 94      | 34  | 0   | 0.668                         |
| 3                                          | Wu et al, 2016                       | China   | POAG: 89/131<br>Control: 102/146                     | POAG: 58.09 ± 12.065<br>Control: 9.37 ± 11.92     | 219                   | 1   | 0  | 245     | 1   | 0   | 0.975                         |
| 4                                          | Zimmermann et al, 2013               | Austria | POAG: 111/80<br>Control: 191 (nd)                    | POAG: 71.5 ± 9.8<br>Control: 70.9 ± 9.6           | 63                    | 98  | 30 | 67      | 87  | 37  | 0.362                         |
| <b>Retinopathy</b>                         |                                      |         |                                                      |                                                   |                       |     |    |         |     |     |                               |
| 5                                          | Goverdhan et al, 2008                | UK      | AMD: 312/166<br>Control: 306/249                     | AMD: 78.8 ± 7.9<br>Control: 69.0 ± 9.7            | 156                   | 223 | 83 | 178     | 270 | 105 | 0.884                         |
| 6                                          | Lu et al, 2016                       | China   | PDR: 215 (nd)<br>Control: 207 (nd)                   | PDR: 58.3 ± 2.7<br>Control: 60.6 ± 3.9            | 64                    | 118 | 33 | 78      | 87  | 42  | 0.553                         |
| 7                                          | Masood et al, 2007                   | UK      | CMO+Control = 54<br>(nd)                             | NA                                                | 9                     | 5   | 8  | 18      |     |     | NA                            |
| 8                                          | Myśliwska et al, 2009                | Poland  | DR: 106/114<br>Control: 80/90                        | DR: 16.1 ± 1.7/ 18.8 ± 2.1<br>Control: 16.9 ± 5.2 | 12                    | 24  | 0  | 51      | 68  | 51  | 0.009                         |
| 9                                          | Paine et al, 2012                    | India   | PDR: 133/120<br>Control: 118/112                     | PDR: 52 ± 15.0<br>Control: 54 ± 2.0               | 138                   | 103 | 12 | 140     | 92  | 8   | 0.125                         |
| 10                                         | Sanabria Ruiz-Colmenares et al, 2006 | Spain   | RD+PVR: 21/37<br>Control: 14/32                      | RD+PVR: 62.1/ 58.1<br>Control: 36.9               | 28                    | 19  | 11 | 16      | 26  | 4   | 0.148                         |
| <b>Ocular and Intraocular inflammation</b> |                                      |         |                                                      |                                                   |                       |     |    |         |     |     |                               |
| 11                                         | Anvari et al, 2009                   | Iran    | Graves' ophthalmology: 34/16<br>Control: 140 (nd)    | NA                                                | 29                    | 17  | 28 | 42      | 93  | 4   | 0.000                         |
| 12                                         | Bednarczuk et al, 2004               | Poland  | Graves' ophthalmology: 108 (nd)<br>Control: 186 (nd) | Graves' ophthalmology: 21/37<br>Control: 14/32    | 35                    | 55  | 21 | 58      | 101 | 27  | 0.110                         |

| No.                               | Study, year              | Country   | Gender (f/m)                                              | Age <sup>a</sup>                                                                | Genotype distribution |     |    |         |     |     | P <sub>HWE</sub> <sup>b</sup> |
|-----------------------------------|--------------------------|-----------|-----------------------------------------------------------|---------------------------------------------------------------------------------|-----------------------|-----|----|---------|-----|-----|-------------------------------|
|                                   |                          |           |                                                           |                                                                                 | Case                  |     |    | Control |     |     |                               |
|                                   |                          |           |                                                           |                                                                                 | GG                    | GC  | CC | GG      | GC  | CC  |                               |
| 13                                | Carnt et al, 2012        | Australia | Contact lens keratitis:<br>90 (nd)<br>Control: 185 (nd)   | NA                                                                              | 36                    | 48  | 16 | 66      | 85  | 34  | 0.473                         |
| 14                                | Cordeiro et al, 2013     | Brazil    | Toxoplasmic retinochoroiditis:<br>58/39<br>Control: 42/41 | Toxoplasmic retinochoroiditis: 32.2 ± 12.7<br>Control: 34.71 ± 10.45            | 69                    | 22  | 6  | 74      | 4   | 5   | 0.000                         |
| 15                                | Dilek et al, 2009        | Turkey    | Ocular Behcet's disease: 97 (nd)<br>Control: 122 (nd)     | NA                                                                              | 54                    | 39  | 4  | 75      | 37  | 10  | 0.091                         |
| 16                                | Ewald et al, 2015        | Austria   | Uveitis: 97/110<br>Control: 69/128                        | Uveitis: 44.81 ± 14.70/<br>30.82 ± 16.66<br>Control: 35.56 ± 12.10/37.75 ± 4.02 | 59                    | 126 | 33 | 75      | 93  | 29  | 0.984                         |
| 17                                | Gedvilaite et al, 2019   | Lithuania | Optic neuritis: 42/21<br>Control: 480/274                 | Optic neuritis: 34<br>Control: 53                                               | 33                    | 27  | 12 | 170     | 373 | 211 | 0.833                         |
| 18                                | Na et al, 2011           | Korea     | non-Sjogren dry eye:<br>251 (nd)<br>Control: 109 (nd)     | NA                                                                              | 251                   | 0   | 0  | 108     | 1   | 0   | 0.961                         |
| 19                                | Sen et al, 2011          | India     | Eales' disease: 24/97<br>Control: 40/183                  | Eales' disease: 30.6 ± 10.7<br>Control: 32.26 ± 9.6                             | 91                    | 25  | 5  | 135     | 75  | 13  | 0.549                         |
| 20                                | Taalat et al, 2014       | Egypt     | Ocular Behcet's disease: 16/71<br>Control: 96 (nd)        | Ocular Behcet's disease: 34.37 ± 10.36<br>Control: NA                           | 47                    | 8   | 0  | 76      | 21  | 0   | 0.231                         |
| <b>Retinal vascular occlusion</b> |                          |           |                                                           |                                                                                 |                       |     |    |         |     |     |                               |
| 21                                | Steinbrugger et al, 2009 | Austria   | RVO: 228/170<br>Control: 206/149                          | RVO: 67.1 ± 11.0<br>Control: 68.3 ± 13.8                                        | 130                   | 197 | 71 | 115     | 174 | 66  | 0.989                         |
| 22                                | Weger et al, 2004        | Austria   | RAO: 77/105<br>Control: 135/172                           | RAO: 69.1 ± 11.3<br>Control: 70.9 ± 11.4                                        | 64                    | 99  | 19 | 107     | 139 | 61  | 0.197                         |

| No.                                           | Study, year            | Country | Gender (f/m) | Age <sup>a</sup> | Genotype distribution |    |    |         |    |    | P <sub>HWE</sub> <sup>b</sup> |
|-----------------------------------------------|------------------------|---------|--------------|------------------|-----------------------|----|----|---------|----|----|-------------------------------|
|                                               |                        |         |              |                  | Case                  |    |    | Control |    |    |                               |
|                                               |                        |         |              |                  | GG                    | GC | CC | GG      | GC | CC |                               |
| <b>Congenital eye disorders</b>               |                        |         |              |                  |                       |    |    |         |    |    |                               |
| <b>Hereditary stromal corneal dystrophies</b> |                        |         |              |                  |                       |    |    |         |    |    |                               |
| 23                                            | Kucherenko et al, 2013 | Kyiv    | NA           | NA               | 12                    | 29 | 30 | 30      | 39 | 19 | 0.350                         |

<sup>a</sup>Age was expressed as mean or mean  $\pm$  SD, or otherwise indicated, <sup>b</sup>P for Hardy–Weinberg equilibrium (HWE) test in controls.

AMD, age-related macular degeneration; CMO, cystoid macular oedema; DR, diabetic retinopathy; NTG, normal tension glaucoma, NA, not available; ND, not define; POAG, primary open-angle glaucoma; PDR, proliferative diabetic retinopathy; PVR, proliferative vitreoretinopathy; RAO, retinal artery occlusion; RD, retinal detachment; RVO, retinal vein occlusion.

**Supplemental Table S2.** Meta-analysis for the association between IL-6-174 G/C polymorphism and ocular disease

| Genetic model                     | Group                                      | Number of studies | Test of association <sup>a</sup> |              |       |        | Test of heterogeneity |                    | P Egger's test |
|-----------------------------------|--------------------------------------------|-------------------|----------------------------------|--------------|-------|--------|-----------------------|--------------------|----------------|
|                                   |                                            |                   | OR                               | 95% CI       | P     | Model  | P                     | I <sup>2</sup> (%) |                |
| Allele model<br>(C vs. G)         | Overall* (1a)                              | 22                | 0.96                             | 0.84 – 1.12  | 0.649 | Random | 0.0001                | 67.83              | 0.686          |
|                                   | Overall** (1b)                             | 19                | 0.94                             | 0.82 – 1.08  | 0.372 | Random | 0.0004                | 60.18              | 0.423          |
|                                   | Glaucoma (2)                               | 4                 | 0.87                             | 0.69 – 1.11  | 0.265 | Fixed  | 0.4082                | 0                  | 0.682          |
|                                   | Retinopathy* (3a)                          | 5                 | 0.97                             | 0.86 – 1.10  | 0.645 | Fixed  | 0.1004                | 48.52              | 0.485          |
|                                   | Retinopathy** (3b)                         | 4                 | 1.01                             | 0.89 – 1.15  | 0.887 | Fixed  | 0.6841                | 0                  | 0.657          |
|                                   | Diabetic retinopathy* (4)                  | 3                 | 0.91                             | 0.61 – 1.34  | 0.627 | Random | 0.0226                | 73.60              | 0.166          |
|                                   | PDR (5)                                    | 2                 | 1.10                             | 0.90 – 1.35  | 0.331 | Fixed  | 0.6873                | 0                  | NA             |
|                                   | Ocular and Intraocular inflammation* (6a)  | 10                | 0.98                             | 0.7 – 1.32   | 0.890 | Random | 0.0001                | 77.59              | 0.719          |
|                                   | Ocular and Intraocular inflammation** (6b) | 8                 | 0.83                             | 0.62 – 1.11  | 0.216 | Random | 0.0009                | 71.64              | 0.296          |
|                                   | Graves' ophthalmology* (7)                 | 2                 | 1.34                             | 0.86 – 2.09  | 0.191 | Random | 0.0926                | 64.65              | NA             |
|                                   | Ocular Behcet's disease (8)                | 2                 | 0.95                             | 0.64 – 1.40  | 0.782 | Random | 0.3218                | 0                  | NA             |
|                                   | Retinal ascular occlusion (9)              | 2                 | 0.92                             | 0.78 – 1.08  | 0.283 | Fixed  | 0.2868                | 11.86              | NA             |
|                                   | Asian** (10)                               | 8                 | 0.88                             | 0.69 – 1.12  | 0.311 | Random | 0.0837                | 44.25              | 0.222          |
|                                   | Caucasian** (11)                           | 10                | 0.98                             | 0.82 – 1.17  | 0.831 | Random | 0.0002                | 71.62              | 0.732          |
| Recessive model<br>(CC vs. GC+GG) | Overall* (1a)                              | 17                | 1.02                             | 0.74 – 1.41  | 0.871 | Random | 0.0001                | 74.19              | 0.679          |
|                                   | Overall** (1b)                             | 14                | 0.91                             | 0.72 – 1.14  | 0.435 | Random | 0.0176                | 49.78              | 0.736          |
|                                   | Glaucoma (2)                               | 4                 | 0.77                             | 0.46 – 1.32  | 0.347 | Fixed  | 1                     | 0                  | 0.001          |
|                                   | Retinopathy* (3a)                          | 5                 | 0.94                             | 0.55 – 1.61  | 0.841 | Random | 0.0412                | 59.81              | 0.797          |
|                                   | Retinopathy** (3b)                         | 4                 | 0.94                             | 0.73 – 1.21  | 0.632 | Fixed  | 0.2200                | 32.05              | 0.299          |
|                                   | Diabetic retinopathy* (4)                  | 3                 | 0.64                             | 0.21 – 1.98  | 0.439 | Random | 0.0324                | 70.84              | 0.638          |
|                                   | PDR (5)                                    | 2                 | 0.84                             | 0.54 – 1.30  | 0.435 | Fixed  | 0.1837                | 43.43              | NA             |
|                                   | Ocular and Intraocular inflammation* (6a)  | 8                 | 1.16                             | 0.61 – 2.22  | 0.642 | Random | 0.0001                | 80.67              | 0.710          |
|                                   | Ocular and Intraocular inflammation** (6b) | 6                 | 0.85                             | 0.64 – 1.13  | 0.281 | Fixed  | 0.2937                | 18.44              | 0.603          |
|                                   | Graves' ophthalmology* (7)                 | 2                 | 5.10                             | 0.36 – 72.26 | 0.227 | Random | 0.0001                | 94.30              | NA             |
|                                   | Ocular Behcet's disease (8)                | 2                 | 0.48                             | 0.15 – 1.59  | 0.230 | Fixed  | 1                     | NA                 | NA             |
|                                   | Retinal ascular occlusion (9)              | 2                 | 0.69                             | 0.35 – 1.37  | 0.289 | Random | 0.0378                | 76.82              | NA             |
|                                   | Asian** (10)                               | 4                 | 0.77                             | 0.52 – 1.13  | 0.189 | Fixed  | 0.4671                | 0                  | 0.874          |
|                                   | Caucasian** (11)                           | 10                | 0.95                             | 0.72 – 1.25  | 0.737 | Random | 0.0071                | 60.21              | 0.474          |

| Genetic model                        | Group                                      | Number of studies | Test of association <sup>a</sup> |             |        | Test of heterogeneity |        | P Egger's test |                    |
|--------------------------------------|--------------------------------------------|-------------------|----------------------------------|-------------|--------|-----------------------|--------|----------------|--------------------|
|                                      |                                            |                   | OR                               | 95% CI      | P      | Model                 | P      |                | I <sup>2</sup> (%) |
| Dominant model<br>(CC+GC vs. GG)     | Overall* (1a)                              | 22                | 0.95                             | 0.78 – 1.15 | 0.631  | Random                | 0.0001 | 65.37          | 0.616              |
|                                      | Overall** (1b)                             | 19                | 0.93                             | 0.76 – 1.13 | 0.490  | Random                | 0.0001 | 64.24          | 0.394              |
|                                      | Glaucoma (2)                               | 4                 | 0.87                             | 0.64 – 1.18 | 0.374  | Fixed                 | 0.2585 | 25.52          | 0.804              |
|                                      | Retinopathy* (3a)                          | 5                 | 1.03                             | 0.86 – 1.24 | 0.678  | Fixed                 | 0.2120 | 31.42          | 0.636              |
|                                      | Retinopathy** (3b)                         | 4                 | 1.04                             | 0.87 – 1.25 | 0.602  | Fixed                 | 0.1340 | 46.23          | 0.791              |
|                                      | Diabetic retinopathy* (4)                  | 3                 | 1.22                             | 0.95 – 1.57 | 0.123  | Fixed                 | 0.4852 | 0              | 0.535              |
|                                      | PDR (5)                                    | 2                 | 1.27                             | 0.97 – 1.66 | 0.076  | Fixed                 | 0.4653 | 0              | NA                 |
|                                      | Ocular and Intraocular inflammation* (6a)  | 10                | 0.88                             | 0.58 – 1.34 | 0.562  | Random                | 0.0001 | 78.89          | 0.804              |
|                                      | Ocular and Intraocular inflammation** (6b) | 8                 | 0.79                             | 0.50 – 1.23 | 0.303  | Random                | 0.0001 | 77.81          | 0.461              |
|                                      | Graves' ophthalmology* (7)                 | 2                 | 0.84                             | 0.57 – 1.23 | 0.364  | Fixed                 | 0.3366 | 0              | NA                 |
|                                      | Ocular Behcet's disease (8)                | 2                 | 1.05                             | 0.66 – 1.66 | 0.230  | Fixed                 | 1      | NA             | NA                 |
| Retinal ascular occlusion (9)        | 2                                          | 0.99              | 0.78 – 1.25                      | 0.916       | Fixed  | 0.9954                | 0      | NA             |                    |
| Asian** (10)                         | 8                                          | 0.89              | 0.63 – 1.27                      | 0.544       | Random | 0.0133                | 60.50  | 0.355          |                    |
| Caucasian** (11)                     | 10                                         | 0.97              | 0.74 – 1.26                      | 0.833       | Random | 0.0002                | 71.53  | 0.993          |                    |
| Overdominant model<br>(GC vs. CC+GG) | Overall* (1a)                              | 22                | 0.95                             | 0.75 – 1.20 | 0.678  | Random                | 0.0001 | 77.75          | 0.394              |
|                                      | Overall** (1b)                             | 19                | 0.97                             | 0.82 – 1.16 | 0.762  | Random                | 0.0008 | 57.98          | 0.085              |
|                                      | Glaucoma (2)                               | 4                 | 0.95                             | 0.71 – 1.28 | 0.738  | Fixed                 | 0.1225 | 48.15          | 0.852              |
|                                      | Retinopathy* (3a)                          | 5                 | 1.17                             | 0.77 – 1.80 | 0.464  | Random                | 0.0008 | 79.01          | 0.838              |
|                                      | Retinopathy** (3b)                         | 4                 | 1.01                             | 0.68 – 1.51 | 0.943  | Random                | 0.0062 | 75.76          | 0.621              |
|                                      | Diabetic retinopathy* (4)                  | 3                 | 1.62                             | 1.00 – 2.61 | 0.047  | Random                | 0.0438 | 68.04          | 0.366              |
|                                      | PDR (5)                                    | 2                 | 1.34                             | 1.03 – 1.75 | 0.028  | Fixed                 | 0.1208 | 58.45          | NA                 |
|                                      | Ocular and Intraocular inflammation* (6a)  | 10                | 0.82                             | 0.50 – 1.36 | 0.446  | Random                | 0.0001 | 85.19          | 0.687              |
|                                      | Ocular and Intraocular inflammation** (6b) | 8                 | 0.88                             | 0.62 – 1.25 | 0.503  | Random                | 0.0058 | 64.84          | 0.275              |
|                                      | Graves' ophthalmology* (7)                 | 2                 | 0.35                             | 0.07 – 1.91 | 0.228  | Random                | 0.0001 | 94.39          | NA                 |
|                                      | Ocular Behcet's disease (8)                | 2                 | 1.04                             | 0.43 – 2.55 | 0.923  | Random                | 0.0871 | 65.84          | NA                 |
| Retinal ascular occlusion (9)        | 2                                          | 1.16              | 0.93 – 1.46                      | 0.193       | Fixed  | 0.1454                | 52.82  | NA             |                    |
| Asian** (10)                         | 8                                          | 0.93              | 0.63 – 1.39                      | 0.752       | Random | 0.0028                | 67.78  | 0.353          |                    |
| Caucasian** (11)                     | 10                                         | 1.00              | 0.82 – 1.22                      | 0.940       | Random | 0.0191                | 54.58  | 0.228          |                    |

| Genetic model                     | Group                                      | Number of studies | Test of association <sup>a</sup> |              |        |        | Test of heterogeneity |                    | P Egger's test |
|-----------------------------------|--------------------------------------------|-------------------|----------------------------------|--------------|--------|--------|-----------------------|--------------------|----------------|
|                                   |                                            |                   | OR                               | 95% CI       | P      | Model  | P                     | I <sup>2</sup> (%) |                |
| Homozygous model<br>(CC vs. GG)   | Overall* (1a)                              | 17                | 1.02                             | 0.74 – 1.41  | 0.913  | Random | 0.0001                | 69.40              | 0.778          |
|                                   | Overall** (1b)                             | 14                | 0.93                             | 0.71 – 1.23  | 0.619  | Random | 0.0036                | 57.84              | 0.805          |
|                                   | Glaucoma (2)                               | 4                 | 0.86                             | 0.48 – 1.56  | 0.624  | Fixed  | 1                     | 0                  | 0.462          |
|                                   | Retinopathy* (3a)                          | 5                 | 0.96                             | 0.72 – 1.26  | 0.753  | Fixed  | 0.172                 | 37.38              | 0.683          |
|                                   | Retinopathy** (3a)                         | 4                 | 0.99                             | 0.75 – 1.31  | 0.922  | Fixed  | 0.6624                | 0                  | 0.055          |
|                                   | Diabetic retinopathy* (4)                  | 3                 | 0.81                             | 0.28 – 2.33  | 0.696  | Random | 0.0578                | 64.93              | 0.493          |
|                                   | PDR (5)                                    | 2                 | 1.09                             | 0.67 – 1.76  | 0.738  | Fixed  | 0.4019                | 0                  | NA             |
|                                   | Ocular and Intraocular inflammation* (6a)  | 8                 | 1.05                             | 0.55 – 2.01  | 0.880  | Random | 0.0001                | 78.07              | 0.786          |
|                                   | Ocular and Intraocular inflammation** (6b) | 6                 | 0.75                             | 0.43 – 1.30  | 0.320  | Random | 0.0136                | 65.11              | 0.736          |
|                                   | Graves' ophthalmology* (7)                 | 2                 | 3.43                             | 0.46 – 25.84 | 0.231  | Random | 0.0028                | 88.85              | NA             |
|                                   | Ocular Behcet's disease (8)                | 2                 | 0.56                             | 0.17 – 1.86  | 0.341  | Fixed  | 1                     | NA                 | NA             |
| Retinal ascular occlusion (9)     | 2                                          | 0.78              | 0.55 – 1.10                      | 0.159        | Fixed  | 0.1066 | 61.59                 | NA                 |                |
| Asian** (10)                      | 4                                          | 0.91              | 0.60 – 1.37                      | 0.661        | Fixed  | 0.4586 | 0                     | 0.616              |                |
| Caucasian** (11)                  | 10                                         | 0.95              | 0.67 – 1.35                      | 0.793        | Random | 0.0009 | 68.13                 | 0.550              |                |
| Heterozygous model<br>(GC vs. GG) | Overall* (1a)                              | 22                | 0.95                             | 0.76 – 1.19  | 0.650  | Random | 0.0001                | 71.14              | 0.520          |
|                                   | Overall** (1b)                             | 19                | 0.94                             | 0.78 – 1.16  | 0.610  | Random | 0.0001                | 62.66              | 0.248          |
|                                   | Glaucoma (2)                               | 4                 | 0.90                             | 0.65 – 1.23  | 0.494  | Fixed  | 0.1882                | 37.31              | 0.795          |
|                                   | Retinopathy* (3a)                          | 5                 | 1.09                             | 0.78 – 1.52  | 0.625  | Random | 0.0375                | 60.70              | 0.896          |
|                                   | Retinopathy** (3b)                         | 4                 | 1.03                             | 0.71 – 1.51  | 0.862  | Random | 0.0235                | 68.36              | 0.681          |
|                                   | Diabetic retinopathy* (4)                  | 3                 | 1.35                             | 1.04 – 1.75  | 0.026  | Fixed  | 0.4127                | 0                  | 0.710          |
|                                   | PDR (5)                                    | 2                 | 1.33                             | 1.01 – 1.76  | 0.045  | Fixed  | 0.1937                | 40.79              | NA             |
|                                   | Ocular and Intraocular inflammation* (6a)  | 10                | 0.84                             | 0.51 – 1.37  | 0.480  | Random | 0.0001                | 82.42              | 0.775          |
|                                   | Ocular and Intraocular inflammation** (6a) | 8                 | 0.81                             | 0.52 – 1.27  | 0.375  | Random | 0.0002                | 75.70              | 0.386          |
|                                   | Graves' ophthalmology* (7)                 | 2                 | 0.50                             | 0.15 – 1.66  | 0.257  | Random | 0.0063                | 86.58              | NA             |
|                                   | Ocular Behcet's disease (8)                | 2                 | 1.02                             | 0.44 – 2.35  | 0.964  | Random | 0.1089                | 61.09              | NA             |
| Retinal ascular occlusion (9)     | 2                                          | 1.07              | 0.83 – 1.38                      | 0.590        | Fixed  | 0.5115 | 0                     | NA                 |                |
| Asian** (10)                      | 8                                          | 0.92              | 0.62 – 1.36                      | 0.691        | Random | 0.0049 | 65.60                 | 0.403              |                |
| Caucasian** (11)                  | 10                                         | 0.98              | 0.76 – 1.26                      | 0.876        | Random | 0.0015 | 66.33                 | 0.652              |                |

| Genetic model                 | Group                                      | Number of studies | Test of association <sup>a</sup> |               |       |        | Test of heterogeneity |                    | P Egger's test |
|-------------------------------|--------------------------------------------|-------------------|----------------------------------|---------------|-------|--------|-----------------------|--------------------|----------------|
|                               |                                            |                   | OR                               | 95% CI        | P     | Model  | P                     | I <sup>2</sup> (%) |                |
| GC vs. CC                     | Overall* (1a)                              | 22                | 1.02                             | 0.92 – 1.13   | 0.670 | Fixed  | 0.7570                | 0                  | 0.685          |
|                               | Overall** (1b)                             | 19                | 1.03                             | 0.92 – 1.14   | 0.568 | Fixed  | 1                     | 0                  | 0.348          |
|                               | Glaucoma (2)                               | 4                 | 1.06                             | 0.63 – 1.78   | 0.706 | Fixed  | 0.9960                | 0                  | 0.312          |
|                               | Retinopathy* (3a)                          | 5                 | 1.06                             | 0.84 – 1.33   | 0.515 | Fixed  | 0.4330                | 0                  | 0.743          |
|                               | Retinopathy** (3b)                         | 4                 | 1.02                             | 0.77 – 1.34   | 0.829 | Fixed  | 0.7440                | 0                  | 0.470          |
|                               | Diabetic retinopathy* (4)                  | 3                 | 1.15                             | 0.67 – 1.97   | 0.268 | Fixed  | 0.3070                | 15.41              | 0.330          |
|                               | PDR (5)                                    | 2                 | 1.07                             | 0.19 – 5.97   | 0.625 | Fixed  | 0.5210                | 0                  | NA             |
|                               | Ocular and Intraocular inflammation* (6a)  | 10                | 0.96                             | 0.78 – 1.18   | 0.637 | Fixed  | 0.3880                | 5.81               | 0.962          |
|                               | Ocular and Intraocular inflammation** (6b) | 8                 | 1.03                             | 0.82 – 1.29   | 0.794 | Fixed  | 1                     | 0                  | 0.888          |
|                               | Graves' ophthalmology* (7)                 | 2                 | 0.62                             | 0.00 – 130.98 | 0.257 | Random | 0.0030                | 78.82              | NA             |
|                               | Ocular Behcet's disease (8)                | 2                 | 1.12                             | 0.03 – 36.96  | 0.688 | Fixed  | 0.8310                | 0                  | NA             |
| Retinal ascular occlusion (9) | 2                                          | 1.08              | 0.27 – 4.27                      | 0.459         | Fixed | 0.4330 | 0                     | NA                 |                |
| Asian** (10)                  | 8                                          | 1.06              | 0.82 – 1.36                      | 0.604         | Fixed | 0.9990 | 0                     | 0.656              |                |
| Caucasian** (11)              | 10                                         | 1.02              | 0.89 – 1.17                      | 0.713         | Fixed | 0.9540 | 0                     | 0.176              |                |

<sup>a</sup>If the P value for Q-statistic was < 0.10 or the I<sup>2</sup> value ≥ 50% random-effect model was used, otherwise fixed-effect model was adopted. OR, odds ratio; CI, confidence interval; HWE, Hardy–Weinberg equilibrium; NA, not available; PDR, proliferative diabetic retinopathy. \*all relevant articles were included; \*\*articles that deviate from the HWE were excluded.



**Supplemental Table S3.** Summary of the studies for IL-6 levels in the intraocular fluid (aqueous and vitreous humor) between patients with ocular disease and the control subjects

| No.                                             | Study, year                  | Country    | Age <sup>a</sup>                                        | Case |                             | Control |                             |
|-------------------------------------------------|------------------------------|------------|---------------------------------------------------------|------|-----------------------------|---------|-----------------------------|
|                                                 |                              |            |                                                         | n    | IL-6 (pg/mL, mean $\pm$ SD) | n       | IL-6 (pg/mL, mean $\pm$ SD) |
| <b>Glaucoma</b>                                 |                              |            |                                                         |      |                             |         |                             |
| <b>1. Primary open-angle glaucoma (POAG)</b>    |                              |            |                                                         |      |                             |         |                             |
| 1                                               | Borkenstein et al, 2013      | Austria    | POAG: 76.4 $\pm$ 8.9<br>Control: 77.3 $\pm$ 9.4         | 25   | 9.3 $\pm$ 23.7              | 29      | 55.3 $\pm$ 94.4             |
| 2                                               | Chua et al, 2012*            | Singapore  | POAG: 69.9 $\pm$ 7.6<br>Control: 66.5 $\pm$ 11.8        | 26   | 8.425 $\pm$ 7.0             | 23      | 4.615 $\pm$ 3.5             |
| 3                                               | Engel et al, 2014 (a)        | Germany    | POAG: 65.5 $\pm$ 8.6<br>Control: 74.0 $\pm$ 10.3        | 13   | 14.71 $\pm$ 14.33           | 12      | 143.26 $\pm$ 168.70         |
| 4                                               | Engel et al, 2014 (b)        | Germany    | POAG+S: 71.7 $\pm$ 8.8<br>Control: 74.0 $\pm$ 10.3      | 19   | 182.50 $\pm$ 309.13         | 12      | 143.26 $\pm$ 168.70         |
| 5                                               | Freedman and Iserovich, 2013 | USA        | POAG: 74<br>Control: 63                                 | 23   | 94.0 $\pm$ 48.0             | 13      | 19.0 $\pm$ 16.0             |
| 6                                               | Ghanem et al, 2011           | Egypt      | POAG: 61.51 $\pm$ 4.91<br>Control: 60.35 $\pm$ 4.71     | 30   | 85.1 $\pm$ 45.5             | 35      | 34.6 $\pm$ 12.4             |
| 7                                               | Inoue-Mochita et al, 2018    | Japan      | POAG: 62.4 $\pm$ 11.2<br>Control: 80.5 $\pm$ 5.1        | 22   | 15.9 $\pm$ 54.7             | 17      | 34.6 $\pm$ 44.8             |
| 8                                               | Khalef et al, 2017 (a)       | Egypt      | POAG: 65<br>Control: 63                                 | 30   | 15.1 $\pm$ 1.5              | 15      | 64.3 $\pm$ 22.1             |
| 9                                               | Kutchev et al, 2010*         | USA        | POAG: 71.3 $\pm$ 9.9<br>Control: 68.0 $\pm$ 7.3         | 20   | 4.3 $\pm$ 3.5               | 29      | 21.85 $\pm$ 20.5            |
| 10                                              | Niu, 2018 (a)                | China      | POAG: 50.15 $\pm$ 19.12<br>Control: 54.58 $\pm$ 12.28   | 58   | 318.93 $\pm$ 45.71          | 56      | 227.53 $\pm$ 38.28          |
| 11                                              | Ohira et al, 2015 (a)        | Japan      | POAG: 68.9 $\pm$ 10.9<br>Control: 78.3 $\pm$ 6.7        | 36   | 10.0 $\pm$ 22.6             | 68      | 35.6 $\pm$ 109.5            |
| 12                                              | Sorkhabi et al, 2010         | Iran       | POAG: 71.1 $\pm$ 6.3<br>Control: 70.8 $\pm$ 6.5         | 20   | 10.84 $\pm$ 3.37            | 25      | 5.79 $\pm$ 2.63             |
| 13                                              | Takai et al, 2012 (a)        | Japan      | POAG: 73.4 $\pm$ 11.5<br>Control: 75.2 $\pm$ 5.3        | 20   | 15.1 $\pm$ 19.1             | 21      | 64.3 $\pm$ 112.2            |
| 14                                              | Ten Berge et al, 2019*       | Netherland | POAG: 71 $\pm$ 18.25<br>Control: 57.25 $\pm$ 16.5       | 28   | 50.75 $\pm$ 47.75           | 22      | 39.0 $\pm$ 37.5             |
| 15                                              | Zenkel et al, 2010 (a)       | Germany    | POAG: 69.5 $\pm$ 5.9<br>Control: 75.1 $\pm$ 4.8         | 14   | 59.0 $\pm$ 39.0             | 14      | 52.0 $\pm$ 34.0             |
| <b>2. Primary angle-closure glaucoma (PACG)</b> |                              |            |                                                         |      |                             |         |                             |
| 16                                              | Du et al, 2016*              | China      | PACG/Control: 63.80 $\pm$ 6.76                          | 18   | 520.24 $\pm$ 867.5          | 18      | 0.35 $\pm$ 0.455            |
| 17                                              | Duvesh et al, 2017*          | India      | PACG: 60.9<br>Control: 60.7                             | 19   | 347.89 $\pm$ 332.92         | 14      | 58.44 $\pm$ 31.16           |
| 18                                              | Liu et al, 2017              | China      | PACG: 62.1 $\pm$ 6.5<br>Control: 70.2 $\pm$ 7.7         | 20   | 269.8 $\pm$ 648.2           | 15      | 8.2 $\pm$ 9.1               |
| 19                                              | Wang et al, 2018             | China      | PACG: 57.3 $\pm$ 10.8<br>Control: 74.0 $\pm$ 5.5        | 40   | 1.7 $\pm$ 3.6               | 24      | 5.6 $\pm$ 28.9              |
| <b>3. Secondary glaucoma</b>                    |                              |            |                                                         |      |                             |         |                             |
| 20                                              | Khalef et al, 2017 (b)       | Egypt      | PEXG: 67<br>Control: 63                                 | 30   | 23 $\pm$ 1.4                | 15      | 64.3 $\pm$ 22.1             |
| 21                                              | Kovacs et al, 2015           | USA        | NVG: 68.5 $\pm$ 9.5<br>Control: 70.1 $\pm$ 9.9          | 12   | 2858.4 $\pm$ 4111.6         | 29      | 17.3 $\pm$ 19.7             |
| 22                                              | Li et al, 2012* (a)          | Singapore  | PSS, CMV-: 48.4 $\pm$ 13.2<br>Control: 66.3 $\pm$ 14.99 | 39   | 381 $\pm$ 373.5             | 23      | 4.6 $\pm$ 3.5               |
| 23                                              | Li et al, 2012* (b)          | Singapore  | PSS, CMV+: 49.7 $\pm$ 14.3<br>Control: 66.3 $\pm$ 14.99 | 14   | 102.3 $\pm$ 95.75           | 23      | 4.6 $\pm$ 3.5               |

| No.                                     | Study, year                         | Country        | Age <sup>a</sup>                                                                                           | Case |                         | Control |                         |
|-----------------------------------------|-------------------------------------|----------------|------------------------------------------------------------------------------------------------------------|------|-------------------------|---------|-------------------------|
|                                         |                                     |                |                                                                                                            | n    | IL-6 (pg/mL, mean ± SD) | n       | IL-6 (pg/mL, mean ± SD) |
| 24                                      | Liu et al, 2017 (a)                 | China          | Secondary glaucoma post silicone oil tamponade: 49.7 ± 14.3<br>Control: 66.3 ± 14.99<br>NVG: 53.74 ± 18.21 | 19   | 351.1 ± 28.4            | 39      | 254.4 ± 26.8            |
| 25                                      | Niu, 2018 (b)                       | China          | Control: 54.58 ± 12.28                                                                                     | 64   | 670.15 ± 72.61          | 56      | 227.53 ± 38.28          |
| 26                                      | Ohira et al, 2015 (b)               | Japan          | UG: 60.1 ± 14.8<br>Control: 78.3 ± 6.7                                                                     | 39   | 171.1 ± 317.8           | 68      | 35.6 ± 109.5            |
| 27                                      | Rusnak et al, 2015*                 | Czech Republic | PDR+NVG: NA<br>Control: NA                                                                                 | 11   | 2689.7 ± 2490.02        | 50      | 51.48 ± 48.29           |
| 28                                      | Sarenac Vulovic et al, 2015 (a)     | Serbia         | PEXG: 77.2 ± 3.9<br>Control: 63.4 ± 4.2                                                                    | 30   | 424.86 ± 72.98          | 30      | 143.82 ± 22.41          |
| 29                                      | Takai et al, 2012 (b)               | Japan          | PEXG: 79.4 ± 4.5<br>Control: 75.2 ± 5.3                                                                    | 23   | 105.1 ± 124.2           | 21      | 64.3 ± 112.2            |
| 30                                      | Zenkel et al, 2010 (b)              | Germany        | PEXG: 76.7 ± 7.8<br>Control: 75.1 ± 4.8                                                                    | 14   | 50.0 ± 36.1             | 14      | 52.0 ± 34.0             |
| <b>Pseudoexfoliation (PEX) syndrome</b> |                                     |                |                                                                                                            |      |                         |         |                         |
| 31                                      | Garweg et al, 2017 (a)              | Switzerland    | Early PEX: 81.19<br>Control: 68.32                                                                         | 33   | 2.2 ± 0.8               | 20      | 4.1 ± 2.7               |
| 32                                      | Garweg et al, 2017 (b)              | Switzerland    | Late PEX: 79.30<br>Control: 68.32                                                                          | 30   | 3.1 ± 1.5               | 20      | 4.1 ± 2.7               |
| 33                                      | Garweg et al, 2017 (c)              | Switzerland    | Late PEX+Luxation: 84.24<br>Control: 68.32                                                                 | 10   | 118.6 ± 104.9           | 20      | 4.1 ± 2.7               |
| 34                                      | Sarenac Vulovic et al, 2015 (b)     | Serbia         | Early PEX: 73.4 ± 6.5<br>Control: 63.4 ± 4.2                                                               | 30   | 627.05 ± 65.69          | 30      | 143.82 ± 22.41          |
| 35                                      | Sarenac Vulovic et al, 2015 (c)     | Serbia         | Late PEX: 73.4 ± 6.5<br>Control: 63.4 ± 4.2                                                                | 30   | 162.86 ± 38.37          | 30      | 143.82 ± 22.41          |
| 36                                      | Zenkel et al, 2010 (c)              | Germany        | Early PEX: 75.8 ± 8.1<br>Control: 75.1 ± 4.8                                                               | 14   | 186.0 ± 99.0            | 14      | 52.0 ± 34.0             |
| 37                                      | Zenkel et al, 2010 (d)              | Germany        | Late PEX: 75.5 ± 7.8<br>Control: 75.1 ± 4.8                                                                | 14   | 57.0 ± 32.0             | 14      | 52.0 ± 34.0             |
| <b>Ocular inflammation</b>              |                                     |                |                                                                                                            |      |                         |         |                         |
| <b>1. Surface ocular inflammation</b>   |                                     |                |                                                                                                            |      |                         |         |                         |
| 38                                      | Aketa et al, 2017                   | Japan          | Ocular surface disease: 62.4 ± 13.7<br>Control: 75.6 ± 7.0<br>Fungal keratitis: 49.30 ± 17.02              | 14   | 55.3 ± 14.7             | 30      | 42.7 ± 1.5              |
| 39                                      | Zhang et al, 2018                   | China          | Control: 24.88 ± 12.12                                                                                     | 10   | 6179.71 ± 1015.726      | 8       | 6.22 ± 7.55             |
| <b>2. Intraocular inflammation</b>      |                                     |                |                                                                                                            |      |                         |         |                         |
| <b>2a. Uveitis<sup>a</sup></b>          |                                     |                |                                                                                                            |      |                         |         |                         |
| 40                                      | Banerjee et al, 2007* (a)           | USA            | Uveitis: NA<br>Control: NA                                                                                 | 8    | 145 ± 1004.75           | 8       | 6 ± 6.25                |
| 41                                      | Hernández Garfella et al, 2015      | Spain          | Uveitis: 47.83 ± 11.37<br>Control: 72.16 ± 5.76                                                            | 6    | 109.8 ± 88.1            | 12      | 333.38 ± 274.83         |
| 42                                      | Petrinović-Doresić, et al 1999* (c) | Croatia        | Exogenous uveitis: 54.25 ± 13.25<br>Control: 69.3 ± 5.25                                                   | 14   | 2081.95 ± 1197.2        | 10      | 88.43 ± 63.33           |

| No.                     | Study, year                         | Country    | Age <sup>a</sup>                                                                  | Case |                         | Control |                         |
|-------------------------|-------------------------------------|------------|-----------------------------------------------------------------------------------|------|-------------------------|---------|-------------------------|
|                         |                                     |            |                                                                                   | n    | IL-6 (pg/mL, mean ± SD) | n       | IL-6 (pg/mL, mean ± SD) |
| 43                      | Sijssens et al, 2007 (a)            | Netherland | Uveitis: 9.6<br>Control: 3.3                                                      | 25   | 106 ± 3454.75           | 6       | 6.0 ± 1.5               |
| 44                      | Sijssens et al, 2007* (b)           | Netherland | Uveitis: 9.41 ± 3.26<br>Control: NA                                               | 25   | 3509.25 ± 3454.75       | 6       | 4.5 ± 1.5               |
| 45                      | van Kooij et al, 2006*              | Netherland | Uveitis: 50<br>Control: 66                                                        | 31   | 3783.5 ± 3445.5         | 11      | 87 ± 52                 |
| 46                      | Wakefield et al, 1995               | USA        | Uveitis: 45.8<br>Control: 55.3                                                    | 10   | 135000 ± 2000           | 7       | 0.00 ± 0.00             |
| <b>2b. Infectious</b>   |                                     |            |                                                                                   |      |                         |         |                         |
| 47                      | Ang et al, 2012* (a)                | Singapore  | TAU: 41.1 ± 20.9<br>Control: 66.3 ± 15.0<br>Herpes viral uveitis:                 | 10   | 470.4 ± 276.8           | 23      | 3.4 ± 0.6               |
| 48                      | Curnow et al, 2005* (c)             | UK         | 40.2<br>Control: 73.3                                                             | 5    | 8082 ± 5796.5           | 12      | 324 ± 279.5             |
| 49                      | Murray et al, 1990 (a)              | Netherland | TU: 57.9 ± 14.4<br>Control: 75.1 ± 4.8<br>Endophthalmitis:                        | 8    | 19.23 ± 50.08           | 13      | 0.00 ± 0.00             |
| 50                      | Sauer et al, 2018*                  | France     | 73.2 ± 9.9<br>Control: 71.9 ± 12<br>Resolved herpetic uveitic:                    | 46   | 12662.5 ± 5177.5        | 60      | 55.75 ± 24.25           |
| 51                      | Zenkel et al, 2010 (e)              | Germany    | 57.9 ± 14.4<br>Control: 75.1 ± 4.8                                                | 14   | 193.0 ± 144.0           | 14      | 52.0 ± 34.0             |
| <b>2c. Inflammatory</b> |                                     |            |                                                                                   |      |                         |         |                         |
| 52                      | Ang et al, 2012* (b)                | Singapore  | IU: 55.8 ± 13.7<br>Control: 66.3 ± 15.0<br>Ocular behcet's disease:               | 15   | 21.8 ± 6.1              | 23      | 3.4 ± 0.6               |
| 53                      | Bae and Lee, 2012                   | Korea      | 39.3 ± 11.9<br>Control: NA<br>Inflammatory cataract secondary to                  | 7    | 212.84 ± 150.30         | 23      | 16.59 ± 31.42           |
| 54                      | Chen et al, 2014 (a)                | China      | VKH: 47.10 ± 9.78<br>Control: 49.90 ± 10.59<br>Inflammatory cataract secondary to | 10   | 22.96 ± 6.68            | 10      | 9.31 ± 6.10             |
| 55                      | Chen et al, 2014 (b)                | China      | Behcet's disease: 41.11 ± 7.22<br>Control: 49.90 ± 10.59                          | 9    | 28.34 ± 17.8            | 10      | 9.31 ± 6.10             |
| 56                      | Curnow et al, 2005* (a)             | UK         | IU: 40.2<br>Control: 73.3<br>Behcet's uveitis:                                    | 23   | 230054 ± 199997.5       | 12      | 324 ± 279.5             |
| 57                      | Curnow et al, 2005* (d)             | UK         | 40.2<br>Control: 73.3                                                             | 4    | 10129 ± 3155            | 12      | 324 ± 279.5             |
| 58                      | Murugeswari et al, 2008*            | India      | ED: 29.3 ± 6.1<br>Control: 61.8 ± 8.1                                             | 10   | 400.95 ± 300            | 10      | 0.00 ± 0.00             |
| 59                      | Murugeswari et al, 2014             | India      | ED: 31 ± 10<br>Control: 60.4 ± 8.2<br>Sarcoid uveitis:                            | 5    | 74.48 ± 86.05           | 5       | 0.00 ± 0.00             |
| 60                      | Nagata et al, 2012                  | Japan      | 66.8 ± 2.2<br>Control: 69.5 ± 3.1<br>HLA-B27 <sup>+</sup> anterior uveitis:       | 19   | 736 ± 276.5             | 5       | 13.8 ± 4.2              |
| 61                      | Petrinović-Doresić, et al 1999* (a) | Croatia    | 57.9 ± 14.4<br>Control: 69.3 ± 5.25                                               | 10   | 1023.9 ± 634.55         | 10      | 88.43 ± 63.33           |

| No.                                                 | Study, year                         | Country    | Age <sup>a</sup>                                                            | Case |                         | Control |                         |
|-----------------------------------------------------|-------------------------------------|------------|-----------------------------------------------------------------------------|------|-------------------------|---------|-------------------------|
|                                                     |                                     |            |                                                                             | n    | IL-6 (pg/mL, mean ± SD) | n       | IL-6 (pg/mL, mean ± SD) |
| 62                                                  | Petrinović-Doresić, et al 1999* (b) | Croatia    | Endogenous idiopathic anterior uveitis: 67.1 ± 11.5<br>Control: 69.3 ± 5.25 | 13   | 157.1 ± 134.65          | 10      | 88.43 ± 63.33           |
| 63                                                  | Valentincic et al, 2011*            | Netherland | IU: 36<br>Control: 40                                                       | 36   | 6.6 ± 3.75              | 10      | 4.33 ± 1.38             |
| <b>2d. Pseudo-uveitis</b>                           |                                     |            |                                                                             |      |                         |         |                         |
| 64                                                  | Aketa et al, 2017 (a)               | Japan      | Iris damage: 62.4 ± 13.7<br>Control: 75.6 ± 7.0                             | 14   | 1696 ± 805              | 30      | 6.4 ± 0.9               |
| 65                                                  | Banerjee et al, 2007* (b)           | USA        | LIU: NA<br>Control: NA                                                      | 15   | 5000 ± 7926.25          | 8       | 6 ± 6.25                |
| 66                                                  | Nagarkatti-Gude et al, 2012         | Netherland | Uveal melanoma: 57.9 ± 2.6<br>Control: NA                                   | 33   | 107.89 ± 66.25          | 9       | 38.53 ± 28.46           |
| <b>2e. Ophthalmologic entities</b>                  |                                     |            |                                                                             |      |                         |         |                         |
| 67                                                  | Curnow et al, 2005* (b)             | UK         | FHC: 40.2<br>Control: 73.3                                                  | 5    | 706.75 ± 631.75         | 12      | 324 ± 279.5             |
| 68                                                  | Kuiper et al, 2011*                 | Netherland | BSCR: 61 ± 13<br>Control: 73 ± 12                                           | 16   | 83.9 ± 73.05            | 11      | 7.1 ± 3.5               |
| 69                                                  | Murray et al, 1990 (b)              | Netherland | FHC: 57.9 ± 14.4<br>Control: 75.1 ± 4.8                                     | 16   | 543 ± 1775              | 13      | 0.00 ± 0.00             |
| 70                                                  | Perez et al, 2004*                  | USA        | Pars planitis: NA<br>Control: NA                                            | 23   | 61.64 ± 43.25           | 8       | 10.6 ± 7                |
| <b>Diabetic retinopathy (DR)</b>                    |                                     |            |                                                                             |      |                         |         |                         |
| <b>1. DR<sup>a</sup></b>                            |                                     |            |                                                                             |      |                         |         |                         |
| 71                                                  | Boss et al, 2017                    | USA        | DR: 67.8<br>Control: 61.5                                                   | 22   | 212.5 ± 179.6           | 28      | 43.3 ± 84.7             |
| 72                                                  | Chen et al, 2017                    | China      | DR: 60.7 ± 7.6<br>Control: 61.1 ± 7.4                                       | 101  | 40.64 ± 16.52           | 51      | 23.00 ± 14.42           |
| 73                                                  | Chernykh et al, 2015                | Russia     | DR: 50.5 ± 3.2<br>Control: 53.5 ± 2.6                                       | 38   | 64.2 ± 14.6             | 25      | 32.8 ± 8.7              |
| 74                                                  | Cheung et al, 2012*                 | Singapore  | DR: 67.4 ± 10.7<br>Control: 64.9 ± 17.5                                     | 27   | 505.2 ± 497             | 24      | 8.1 ± 7                 |
| 75                                                  | Dong et al, 2013*                   | China      | DR: 68.92 ± 8.12<br>Control: 65.71 ± 7.35                                   | 56   | 96.5 ± 62.75            | 68      | 65.75 ± 55.75           |
| 76                                                  | Feng et al, 2018 (a)                | China      | 5 yr DR: 58.5 ± 8.9<br>Control: 58.4 ± 5.3                                  | 20   | 86.324 ± 1.54           | 20      | 18.221 ± 1.45           |
| 77                                                  | Feng et al, 2018 (b)                | China      | 10 yr DR: 59.3 ± 7.2<br>Control: 58.6 ± 7.5                                 | 20   | 31.480 ± 1.35           | 20      | 16.080 ± 0.79           |
| 78                                                  | Funatsu et al, 2001                 | Japan      | DR: 67.4<br>Control: 72.8                                                   | 44   | 82.9 ± 93.7             | 16      | 13.6 ± 9.82             |
| 79                                                  | Gustavsson et al, 2012* (a)         | Sweden     | DR: 53.75 ± 14.25<br>Control: 63 ± 10.5                                     | 26   | 1129.5 ± 1105           | 27      | 435.25 ± 344            |
| 80                                                  | Oh et al, 2010                      | Korea      | DR: NA<br>Control: NA                                                       | 38   | 15.48 ± 34.36           | 16      | 23.57 ± 39.10           |
| 81                                                  | Sin et al, 2013                     | Korea      | DR+DMO: NA<br>Control: NA                                                   | 60   | 93.23 ± 110.44          | 10      | 2.083 ± 1.67            |
| 82                                                  | Suzuki et al, 2011                  | Japan      | DR: 57.6 ± 13.6<br>Control: 70.2 ± 7.3                                      | 76   | 1512.24 ± 2314.35       | 10      | 188.24 ± 167.78         |
| 83                                                  | Yuuki et al, 2001                   | Japan      | DVR: NA<br>Control: NA                                                      | 47   | 64.7 ± 12.8             | 22      | 12.8 ± 4.5              |
| <b>1a. Proliferative diabetic retinopathy (PDR)</b> |                                     |            |                                                                             |      |                         |         |                         |
| 84                                                  | Abu el Asrar et al, 1992            | Egypt      | PDR: 51<br>Control: NA                                                      | 13   | 43.3 ± 15.7             | 15      | 0.00 ± 0.00             |

| No. | Study, year                                    | Country        | Age <sup>a</sup>                           | Case |                         | Control |                         |
|-----|------------------------------------------------|----------------|--------------------------------------------|------|-------------------------|---------|-------------------------|
|     |                                                |                |                                            | n    | IL-6 (pg/mL, mean ± SD) | n       | IL-6 (pg/mL, mean ± SD) |
| 85  | Adamiec-Mroczeck and Oficjalska-Młyńczak, 2008 | Poland         | PDR: 63.97 ± 9.0<br>Control: 63.00 ± 14.58 | 19   | 78.76 ± 34.14           | 15      | 7.74 ± 6.94             |
| 86  | Banerjee et al, 2007*                          | USA            | PDR: NA<br>Control: NA                     | 10   | 32 ± 171.5              | 8       | 6 ± 6.25                |
| 87  | Bromberg-White et al, 2013                     | USA            | PDR: 71 ± 7<br>Control: 58 ± 11            | 40   | 45.2 ± 73.68            | 29      | 6.9 ± 16.19             |
| 88  | Canataroglu et al, 2005                        | Turkey         | PDR: 56.1<br>Control: 41.1                 | 14   | 53.44 ± 53.08           | 15      | 0.45 ± 0.79             |
| 89  | Feng et al, 2018 (c)                           | China          | 5 yr PDR: NA<br>Control: 58.4 ± 5.3        | 9    | 91.434 ± 2.12           | 20      | 18.221 ± 1.45           |
| 90  | Feng et al, 2018 (d)                           | China          | 10 yr PDR: NA<br>Control: 58.6 ± 7.5       | 10   | 35.987 ± 0.17           | 20      | 16.080 ± 0.79           |
| 91  | Kauffmann et al, 1994                          | Netherland     | PDR: 56.3 ± 3.9<br>Control: 63 ± 6.9       | 17   | 58 ± 93                 | 11      | 40 ± 68                 |
| 92  | Koskela et al, 2013                            | Finland        | PDR: 59.4 ± 14.3<br>Control: 66.6 ± 9.3    | 36   | 272.6 ± 956.1           | 16      | 4.0 ± 6.1               |
| 93  | Kovacs et al, 2015 (a)                         | USA            | PDR: 65.0 ± 13.6<br>Control: 70.1 ± 9.9    | 29   | 170.3 ± 370.5           | 29      | 17.3 ± 19.7             |
| 94  | Loukovaara et al, 2017                         | Finland        | PDR: 45.1 ± 3.1<br>Control: 64.27 ± 1.87   | 23   | 64.1 ± 59.1             | 15      | 167.3 ± 490.3           |
| 95  | Mocan et al, 2006                              | Turkey         | PDR: 59 ± 11<br>Control: 54 ± 15           | 8    | 755 ± 177               | 8       | 93 ± 151                |
| 96  | Murugeswari et al, 2008* (a)                   | India          | PDR: 54.9 ± 8.9<br>Control: 61.8 ± 8.1     | 25   | 451.48 ± 411.48         | 10      | 0.00 ± 0.00             |
| 97  | Murugeswari et al, 2014 (a)                    | India          | PDR: 54.2 ± 7.8<br>Control: 60.4 ± 8.2     | 10   | 115.67 ± 174.12         | 5       | 0.00 ± 0.00             |
| 98  | Nakamura et al, 2003                           | Japan          | PDR: 54.89 ± 12.1<br>Control: 61.69 ± 11.7 | 62   | 276.19 ± 13.9           | 50      | 96.79 ± 9.3             |
| 99  | Rusnak et al, 2015* (a)                        | Czech Republic | PDR: NA<br>Control: NA                     | 41   | 1163.94 ± 1143.35       | 50      | 51.48 ± 48.29           |
| 100 | Rusnak et al, 2015* (b)                        | Czech Republic | PDR+VB: NA<br>Control: NA                  | 11   | 88.23 ± 73.94           | 50      | 51.48 ± 48.29           |
| 101 | Schoenberger et al, 2012                       | USA            | PDR: 56 ± 10<br>Control: 69 ± 6            | 13   | 22.75 ± 24.5            | 13      | 4.25 ± 8.6              |
| 102 | Shimura et al, 2009                            | Japan          | PDR+PRP/control: 64.4 ± 5.9                | 14   | 520.3 ± 258.2           | 14      | 390.7 ± 150.5           |
| 103 | Song et al, 2014 (a)                           | Korea          | PDR: 49.2 ± 5.8<br>Control: 50.3 ± 4.6     | 12   | 34.69 ± 20.23           | 12      | 68.89 ± 207             |
| 104 | Srividya et al, 2018                           | India          | PDR: NA<br>Control: NA                     | 7    | 55.20 ± 21.72           | 6       | 4.52 ± 1.37             |
| 105 | Takahashi et al, 2016                          | Japan          | PDR: NA<br>Control: NA                     | 55   | 918.0 ± 1703.0          | 14      | 77.3 ± 278.0            |
| 106 | Tsai et al, 2018                               | Germany        | PDR: 63.1 ± 12.2<br>Control: 74.6 ± 8.7    | 17   | 50.40 ± 22.76           | 17      | 42.29 ± 10.94           |
| 107 | Wu et al, 2017 (a)                             | China          | PDR: 67<br>Control: 72                     | 14   | 39.86 ± 28.79           | 10      | 7.10 ± 41.89            |
| 108 | Xu et al, 2015                                 | China          | PDR: 52.12 ± 1.47<br>Control: 52.14 ± 2.06 | 34   | 973.2 ± 115.4           | 37      | 504.6 ± 59.66           |
| 109 | Yoshida et al, 2015                            | Japan          | PDR: 56.8 ± 10.5<br>Control: NA            | 36   | 23.59 ± 3.05            | 57      | 2.71 ± 1.43             |
| 110 | Yoshimura et al, 2009*                         | Japan          | PDR: 55.8 ± 12.5<br>Control: 66.4 ± 7.8    | 147  | 2330.05 ± 2150          | 83      | 65.25 ± 44.2            |

| No.                                                      | Study                           | Country | Age <sup>a</sup>                               | Case |                         | Control |                         |
|----------------------------------------------------------|---------------------------------|---------|------------------------------------------------|------|-------------------------|---------|-------------------------|
|                                                          |                                 |         |                                                | n    | IL-6 (pg/mL, mean ± SD) | n       | IL-6 (pg/mL, mean ± SD) |
| 111                                                      | Zeng et al, 2019* (a)           | China   | PDR+VH: 56.28 ± 8.73<br>Control: 58.40 ± 2.03  | 20   | 19.9 ± 16.36            | 21      | 8.2 ± 7.36              |
| 112                                                      | Zeng et al, 2019* (b)           | China   | PDR+TRD: 55.63 ± 7.64<br>Control: 58.40 ± 2.03 | 19   | 39.05 ± 57.48           | 21      | 8.2 ± 7.36              |
| 113                                                      | Zhou et al, 2012*               | China   | PDR: 62.79 ± 8.97<br>Control: 60.12 ± 9.58     | 62   | 453.36 ± 284.93         | 20      | 13.07 ± 12.82           |
| <b>1b. Non-proliferative diabetic retinopathy (NPDR)</b> |                                 |         |                                                |      |                         |         |                         |
| 114                                                      | Feng et al, 2018 (e)            | China   | 5 yr NPDR: NA<br>Control: 58.4 ± 5.3           | 10   | 81.838 ± 2.33           | 20      | 18.221 ± 1.45           |
| 115                                                      | Feng et al, 2018 (f)            | China   | 10 yr NPDR: NA<br>Control: 58.6 ± 7.5          | 10   | 27.190 ± 0.37           | 20      | 16.080 ± 0.79           |
| 116                                                      | Mastropasqua et al, 2018        | Italy   | NPDR+DMO: 63.4 ± 7.3<br>Control: NA            | 20   | 9.65 ± 5.67             | 20      | 3.39 ± 1.27             |
| 117                                                      | Song et al, 2014 (b)            | Korea   | NPDR: 49.2 ± 5.8<br>Control: 50.3 ± 4.6        | 12   | 14.66 ± 19.84           | 12      | 68.89 ± 207.00          |
| 118                                                      | Wu et al, 2017 (b)              | China   | NPDR: 66<br>Control: 72                        | 15   | 17.33 ± 9.72            | 10      | 7.10 ± 4.19             |
| <b>Macular oedema (MO)</b>                               |                                 |         |                                                |      |                         |         |                         |
| <b>1. Diabetic macular oedema (DMO)</b>                  |                                 |         |                                                |      |                         |         |                         |
| 119                                                      | Bandyopadhyay et al, 2018* (a)  | India   | DRT: 59.29 ± 4.70<br>Control: 60.56 ± 6.81     | 17   | 34.48 ± 8.73            | 16      | 20.68 ± 4.83            |
| 120                                                      | Bandyopadhyay et al, 2018* (b)  | India   | CMO: 61.2 ± 6.46<br>Control: 60.56 ± 6.81      | 20   | 34.35 ± 8.43            | 16      | 20.68 ± 4.83            |
| 121                                                      | Bandyopadhyay et al, 2018* (c)  | India   | SRD: 62.6 ± 6.19<br>Control: 60.56 ± 6.81      | 15   | 56.2 ± 15.0             | 16      | 20.68 ± 4.83            |
| 122                                                      | Bayomy and Elgouhary, 2018* (a) | Egypt   | Focal DMO: 53.2 ± 2.6<br>Control: 52.5 ± 3.2   | 16   | 33.18 ± 8.3             | 17      | 18.4 ± 4.45             |
| 123                                                      | Bayomy and Elgouhary, 2018* (b) | Egypt   | Diffuse DMO: 51.5 ± 3.3<br>Control: 52.5 ± 3.2 | 12   | 47.28 ± 11.58           | 17      | 18.4 ± 4.45             |
| 124                                                      | Chen et al, 2016*               | China   | DMO: NA<br>Control: NA                         | 58   | 44.33 ± 12.95           | 47      | 42 ± 11.45              |
| 125                                                      | Dong et al, 2015* (a)           | China   | DMO: 67.6 ± 8.06<br>Control: 64.8 ± 6.33       | 34   | 104.75 ± 90.5           | 82      | 66.4 ± 56.5             |
| 126                                                      | Dong et al, 2015* (b)           | China   | DMO: 68.92 ± 8.12<br>Control: 65.71 ± 7.35     | 56   | 94.65 ± 87.5            | 68      | 65.75 ± 55.75           |
| 127                                                      | Funatsu et al, 2002 (a)*        | Japan   | Focal DMO/Control: 62.5 ± 9.8<br>Diffuse       | 18   | 113.15 ± 79.50          | 28      | 42.79 ± 30.2            |
| 128                                                      | Funatsu et al, 2002 (b)*        | Japan   | MO+CMO/Control: 62.5 ± 9.8                     | 8    | 132.6 ± 70              | 28      | 42.79 ± 30.2            |
| 129                                                      | Funatsu et al, 2003*            | Japan   | DMO: 64.2 ± 16.8<br>Control: 62.8 ± 13.6       | 26   | 290.65 ± 187.6          | 12      | 11.36 ± 4.60            |
| 130                                                      | Funatsu et al, 2009*            | Japan   | DMO: 61.2 ± 7.2<br>Control: 61.7 ± 6.5         | 53   | 306.55 ± 201.35         | 15      | 11.17 ± 4.8             |
| 131                                                      | Funk et al, 2010                | Austria | DMO: 67.9 ± 10.1<br>Control: 69.9 ± 3.5        | 10   | 46.47 ± 52.6            | 10      | 15.4 ± 30               |
| 132                                                      | Jonas et al, 2012               | Germany | DMO: 70.9 ± 9.3<br>Control: 74.8 ± 10.8        | 23   | 77.6 ± 136              | 22      | 7.48 ± 14.8             |
| 133                                                      | Kim et al, 2014 (a)             | Korea   | DRT: 61.8 ± 6.9<br>Control: 61.3 ± 6.4         | 27   | 69.22 ± 51.22           | 10      | 2.08 ± 1.67             |

| No.                                                                                                       | Study, year                | Country    | Age <sup>a</sup>                                           | Case |                         | Control |                         |
|-----------------------------------------------------------------------------------------------------------|----------------------------|------------|------------------------------------------------------------|------|-------------------------|---------|-------------------------|
|                                                                                                           |                            |            |                                                            | n    | IL-6 (pg/mL, mean ± SD) | n       | IL-6 (pg/mL, mean ± SD) |
| 134                                                                                                       | Kim et al, 2014 (b)        | Korea      | CMO: 60.1 ± 11.1<br>Control: 61.3 ± 6.4                    | 18   | 114.31 ± 31.42          | 10      | 2.08 ± 1.67             |
| 135                                                                                                       | Kim et al, 2014 (c)        | Korea      | SRD: 58.1 ± 13.3<br>Control: 61.3 ± 6.4                    | 15   | 36.01 ± 26.19           | 10      | 2.08 ± 1.67             |
| 136                                                                                                       | Kim et al, 2014 (d)        | Korea      | Combined: 57.3 ± 13.1<br>Control: 61.3 ± 6.4               | 16   | 98.09 ± 34.66           | 10      | 2.08 ± 1.67             |
| 137                                                                                                       | Kim et al, 2015* (a)       | Korea      | DRT: 66.5 ± 10.3<br>Control: 66.6 ± 8.0                    | 19   | 38.97 ± 10.72           | 12      | 16.35 ± 2.5             |
| 138                                                                                                       | Kim et al, 2015* (b)       | Korea      | CMO: 62.4 ± 7.9<br>Control: 66.6 ± 8.0                     | 17   | 24.32 ± 7.77            | 12      | 16.35 ± 2.5             |
| 139                                                                                                       | Kim et al, 2015* (c)       | Korea      | SRD: 65.0 ± 10.2<br>Control: 66.6 ± 8.0                    | 14   | 51.57 ± 7.47            | 12      | 16.35 ± 2.5             |
| 140                                                                                                       | Lee et al, 2012            | Korea      | DMO: 54.8 ± 12.3<br>Control: 66.9 ± 7.3                    | 18   | 66.8 ± 70.4             | 16      | 28.8 ± 39.2             |
| 141                                                                                                       | Noma et al, 2017*          | Japan      | DMO: 64.3 ± 10.3<br>Control: 66.7 ± 4.7                    | 37   | 14.28 ± 6.27            | 13      | 2.87 ± 1.90             |
| 142                                                                                                       | Roh et al, 2009 (a)        | Korea      | CSMO1: 58.7 ± 6.6<br>Control: 63.6 ± 10.1                  | 9    | 167.3 ± 292.4           | 11      | 26.4 ± 36.5             |
| 143                                                                                                       | Roh et al, 2009 (b)        | Korea      | CSMO2: 66.5 ± 7.5<br>Control: 63.6 ± 10.1                  | 8    | 94.9 ± 70.9             | 11      | 26.4 ± 36.5             |
| 144                                                                                                       | Sohn et al, 2011* (a)      | Korea      | DMO: 54.45 ± 10.22<br>Control: 63.33 ± 14.02               | 11   | 10.1 ± 38.1             | 6       | 3.5 ± 20.28             |
| 145                                                                                                       | Sohn et al, 2011* (b)      | Korea      | DMO: 54.45 ± 10.22<br>Control: 63.33 ± 14.02               | 11   | 13.8 ± 43.55            | 6       | 3.5 ± 20.28             |
| 146                                                                                                       | Sonoda et al, 2013         | Japan      | DMO: 62.6 ± 8.4<br>Control: 63.5 ± 7.3                     | 15   | 131.7 ± 71.6            | 12      | 84.9 ± 88.5             |
| 147                                                                                                       | Srividya et al, 2018 (a)   | India      | DMO: NA<br>Control: NA                                     | 11   | 12.08 ± 3.33            | 6       | 4.52 ± 1.37             |
| 148                                                                                                       | Wen et al, 2015            | China      | DMO: 57.9 ± 11.76<br>Control: 58.9 ± 4.66                  | 11   | 1.65 ± 0.10             | 15      | 1.17 ± 0.17             |
| 149                                                                                                       | Yoshida et al, 2015 (a)    | Japan      | DMO: NA<br>Control: NA                                     | 12   | 28.24 ± 3.48            | 24      | 33.52 ± 4.11            |
| 150                                                                                                       | Yoshimura et al, 2009* (a) | Japan      | DMO: 63.0 ± 8.6<br>Control: 66.4 ± 7.8                     | 92   | 382.5 ± 280.5           | 83      | 65.25 ± 44.2            |
| 151                                                                                                       | Yu et al, 2018 (a)*        | Korea      | DMO: 54.45 ± 10.22<br>Control: 63.33 ± 14.02               | 12   | 46.05 ± 23.3            | 6       | 34.79 ± 23.91           |
| 152                                                                                                       | Yu et al, 2018 (b)*        | Korea      | DMO: 54.45 ± 10.22<br>Control: 63.33 ± 14.02               | 12   | 31.18 ± 16.93           | 6       | 34.79 ± 23.91           |
| <b>2. Non-diabetic macular oedema (Non-DMO) or MO not associated with etinal vascular occlusion (RVO)</b> |                            |            |                                                            |      |                         |         |                         |
| 153                                                                                                       | Chu et al, 2013*           | China      | Non-DMO: 73.6 ± 7.43<br>Control: 70.8 ± 8.47               | 23   | 19 ± 10.5               | 23      | 13 ± 6.5                |
| 154                                                                                                       | van Kooij et al, 2006* (a) | Netherland | CMO: 57<br>Control: 43                                     | 57   | 3642 ± 3438             | 11      | 87 ± 52                 |
| <b>Retinal vascular occlusion</b>                                                                         |                            |            |                                                            |      |                         |         |                         |
| <b>1. Retinal vein occlusion (RVO)<sup>b</sup></b>                                                        |                            |            |                                                            |      |                         |         |                         |
| 155                                                                                                       | Feng et al, 2013 (a)       | China      | RVO: 55.28 ± 18.56/57.73 ± 11.35<br>Control: 74.00 ± 12.17 | 28   | 0.96 ± 0.23             | 10      | 0.41 ± 0.08             |

| No.                                              | Study, year                    | Country | Age <sup>a</sup>                                         | Case |                         | Control |                         |
|--------------------------------------------------|--------------------------------|---------|----------------------------------------------------------|------|-------------------------|---------|-------------------------|
|                                                  |                                |         |                                                          | n    | IL-6 (pg/mL, mean ± SD) | n       | IL-6 (pg/mL, mean ± SD) |
| 156                                              | Jung et al, 2014               | Korea   | RVO: 58.6 ± 23.0<br>Control: 59.2 ± 6.3                  | 41   | 12.4 ± 25.2             | 25      | 0.5 ± 1.0               |
| 157                                              | Takahashi et al, 2016 (a)      | Japan   | RVO: NA<br>Control: NA                                   | 10   | 2116.5 ± 5464.0         | 14      | 77.3 ± 278.0            |
| <b>1a. Central retinal vein occlusion (CRVO)</b> |                                |         |                                                          |      |                         |         |                         |
| 158                                              | Chen et al, 1999 (a)           | Taiwan  | CRVO: 63.7 ± 2.7<br>Control: 70.9 ± 3.3                  | 5    | 15.6 ± 0.9              | 6       | 26.4 ± 21.8             |
| 159                                              | Chen et al, 1999 (b)           | Taiwan  | CRVO+NVI: 67.8 ± 5.4<br>Control: 70.9 ± 3.3              | 10   | 1532 ± 221.1            | 6       | 26.4 ± 21.8             |
| 160                                              | Chen et al, 1999 (c)           | Taiwan  | CRVO+regressed<br>NVI: 67.8 ± 5.4<br>Control: 70.9 ± 3.3 | 9    | 234.3 ± 154.6           | 6       | 26.4 ± 21.8             |
| 161                                              | Ehlken et al, 2015             | Germany | CRVO: 74.6 ± 9.7<br>Control: 69.5 ± 9.8                  | 13   | 43 ± 38                 | 13      | 4 ± 3                   |
| 162                                              | Feng et al, 2013 (b)           | China   | CRVO: 55.28 ± 18.56<br>Control: 74.00 ± 12.17            | 18   | 0.96 ± 0.24             | 10      | 0.41 ± 0.08             |
| 163                                              | Funk et al, 2009* (a)          | Austria | CRVO: 58.2 ± 11.5<br>Control: 66.2 ± 5.3                 | 8    | 83.2 ± 66.2             | 13      | 2.1 ± 2.7               |
| 164                                              | Koss et al, 2012 (a)           | Germany | CRVO: 62.9 ± 5.6<br>Control: 63.9 ± 5.82                 | 35   | 64.7 ± 115.8            | 14      | 6.2 ± 3.4               |
| 165                                              | Koss et al, 2012 (b)           | Germany | H-CRVO: 62.9 ± 5.6<br>Control: 63.9 ± 5.82               | 16   | 59.9 ± 97.5             | 14      | 6.2 ± 3.4               |
| 166                                              | Koss et al, 2013               | Germany | CRVO: 71.1 ± 11.7<br>Control: 66.2 ± 7.9                 | 35   | 64.7 ± 115.8            | 28      | 6.2 ± 3.4               |
| 167                                              | Noma et al, 2009*              | Japan   | CRVO+MO: 69.7 ± 9.4<br>Control: 65.1 ± 6.5               | 27   | 63.68 ± 25.43           | 16      | 1.12 ± 0.20             |
| 168                                              | Noma et al, 2010*              | Japan   | CRVO+MO: 70.3 ± 9.7<br>Control: 68.0 ± 6.2               | 16   | 65.79 ± 41.17           | 8       | 2.32 ± 0.76             |
| 169                                              | Noma et al, 2012* (a)          | Japan   | CRVO+SRD: 69 ± 9<br>Control: 68.0 ± 6.2                  | 10   | 93.55 ± 33.05           | 8       | 2.48 ± 0.41             |
| 170                                              | Noma et al, 2012* (b)          | Japan   | CRVO+CMO: 70 ± 9<br>Control: 68.0 ± 6.2                  | 10   | 9.26 ± 3.34             | 8       | 2.48 ± 0.41             |
| 171                                              | Noma et al, 2013* (a)          | Japan   | I-CRVO+MO: 71.2 ± 6.9<br>Control: 68.1 ± 4.9             | 15   | 57.35 ± 20.65           | 17      | 0.92 ± 0.36             |
| 172                                              | Noma et al, 2013* (b)          | Japan   | NI-CRVO+MO: 71.2 ± 6.9<br>Control: 68.1 ± 4.9            | 6    | 18.45 ± 8.70            | 17      | 0.92 ± 0.36             |
| 173                                              | Noma et al, 2015*              | Japan   | CRVO+MO: 72.2 ± 10.7<br>Control: 67.9 ± 3.2              | 38   | 15.8 ± 5.4              | 15      | 1.59 ± 0.80             |
| 174                                              | Rezar-Dreindl et al, 2016* (a) | Austria | CRVO: 70.4 ± 9.8<br>Control: NA                          | 15   | 14.25 ± 12.45           | 15      | 72.95 ± 72.95           |
| 175                                              | Shchuko et al, 2015 (a)        | Russia  | CRVO: 60.7 ± 7.5<br>Control: 60 ± 6.1                    | 18   | 285.73 ± 232.51         | 20      | 52.19 ± 34.55           |
| 176                                              | Suzuki et al, 2011             | Japan   | CRVO: 67.2 ± 15.1<br>Control: 70.2 ± 7.3                 | 23   | 3427.40 ± 5429.39       | 10      | 188.24 ± 167.78         |
| 177                                              | Wen et al, 2015 (a)            | China   | CRVO+MO: 57.91 ± 14.8<br>Control: 58.9 ± 4.66            | 20   | 1.86 ± 0.12             | 15      | 1.17 ± 0.17             |



| No.                                             | Study, year                    | Country | Age <sup>a</sup>                                 | Case |                         | Control |                         |
|-------------------------------------------------|--------------------------------|---------|--------------------------------------------------|------|-------------------------|---------|-------------------------|
|                                                 |                                |         |                                                  | n    | IL-6 (pg/mL, mean ± SD) | n       | IL-6 (pg/mL, mean ± SD) |
| 178                                             | Yoshimura et al, 2009* (b)     | Japan   | CRVO: 71.6 ± 10.8<br>Control: 66.4 ± 7.8         | 13   | 3275 ± 2768.25          | 83      | 65.25 ± 44.2            |
| <b>1b. Branch retinal vein occlusion (BRVO)</b> |                                |         |                                                  |      |                         |         |                         |
| 179                                             | Feng et al, 2013 (c)           | China   | BRVO: 57.73 ± 11.35<br>Control: 74.00 ± 12.17    | 11   | 0.96 ± 0.20             | 10      | 0.41 ± 0.08             |
| 180                                             | Funk et al, 2009* (b)          | Austria | BRVO: 62.5 ± 7.9<br>Control: 66.2 ± 5.3          | 5    | 20.5 ± 21.9             | 13      | 2.1 ± 2.7               |
| 181                                             | Kaneda et al, 2011             | Japan   | BRVO: 67.1 ± 1.8<br>Control: 71.4 ± 1.8          | 38   | 18.6 ± 2.6              | 28      | 10.3 ± 1.4              |
| 182                                             | Koss et al, 2012 (c)           | Germany | BRVO: 62.9 ± 5.6<br>Control: 63.9 ± 5.82         | 43   | 23.2 ± 48.8             | 14      | 6.2 ± 3.4               |
| 183                                             | Lee et al, 2012 (a)            | Korea   | BRVO+MO: 61.3 ± 11.3<br>Control: 66.9 ± 7.3      | 12   | 17.7 ± 26.9             | 16      | 28.8 ± 39.2             |
| 184                                             | Lim, 2011                      | Korea   | BRVO: 66.5 ± 11.1<br>Control: 67.7 ± 6.7         | 46   | 7.5 ± 5.6               | 10      | 2.0 ± 1.3               |
| 185                                             | Noma et al, 2005*              | Japan   | BRVO+MO: 64.5 ± 9.9<br>Control: 67.7 ± 6.7       | 19   | 9.7 ± 5.85              | 7       | 2.4 ± 0.13              |
| 186                                             | Noma et al, 2006*              | Japan   | BRVO+MO: 64.3 ± 10.4<br>Control: 64.4 ± 6.7      | 25   | 69.29 ± 47.76           | 14      | 1.64 ± 0.85             |
| 187                                             | Noma et al, 2013* (c)          | Japan   | BRVO+MO: 69.2 ± 9.6<br>Control: 68.8 ± 8.4       | 39   | 13.98 ± 5.87            | 21      | 0.92 ± 0.17             |
| 188                                             | Noma et al, 2014* (a)          | Japan   | BRVO+MO: 71.2 ± 7.8<br>Control: 68.9 ± 6.0       | 28   | 11.98 ± 4.27            | 17      | 0.96 ± 0.14             |
| 189                                             | Noma et al, 2014* (b)          | Japan   | BRVO+MO: 67.4 ± 11.0<br>Control: 65.0 ± 4.9      | 41   | 8.82 ± 1.88             | 9       | 3.53 ± 1.95             |
| 190                                             | Noma et al, 2016*              | Japan   | BRVO: 69.6 ± 11.9/<br>64.1 ± 7.4<br>Control: NA  | 38   | 4.33 ± 1.92             | 12      | 1.0 ± 0.47              |
| 191                                             | Park and Ahn, 2009             | Korea   | BRVO: 57.2 ± 7.9<br>Control: 62.6 ± 9.5          | 18   | 38 ± 31                 | 10      | 2.3 ± 1.6               |
| 192                                             | Pfister et al, 2013            | Germany | BRVO: 69.7 ± 12.9<br>Control: 66.2 ± 7.9         | 43   | 23.3 ± 48.8             | 28      | 6.2 ± 3.4               |
| 193                                             | Rezar-Dreindl et al, 2016* (b) | Austria | BRVO: 67.9 ± 12.1<br>Control: NA                 | 25   | 13.4 ± 13.4             | 15      | 72.95 ± 72.95           |
| 194                                             | Shchuko et al, 2015 (b)        | Russia  | BRVO: 60.7 ± 7.5<br>Control: 60 ± 6.1            | 26   | 65.82 ± 97.46           | 20      | 52.19 ± 34.55           |
| 195                                             | Shimura et al, 2008            | Japan   | BRVO+MO: 62.88 ± 5.59<br>Control: 63.9 ± 5.82    | 60   | 108.6 ± 79.5            | 12      | 11.8 ± 2.85             |
| 196                                             | Sohn et al, 2014* (a)          | Korea   | BRVO+MO (1): 59 ± 9<br>Control: 67.75 ± 8.25     | 12   | 23.97 ± 11.65           | 6       | 4.23 ± 0.56             |
| 197                                             | Sohn et al, 2014* (b)          | Korea   | BRVO+MO (2): 61.5 ± 8.5<br>Control: 67.75 ± 8.25 | 12   | 15.80 ± 9.62            | 6       | 4.23 ± 0.56             |
| 198                                             | Yoshimura et al, 2009* (c)     | Japan   | BRVO: 69.7 ± 10.7<br>Control: 66.4 ± 7.8         | 30   | 121.8 ± 74              | 83      | 65.25 ± 44.2            |

| No.                                           | Study, year                   | Country     | Age <sup>a</sup>                                                   | Case |                         | Control |                         |
|-----------------------------------------------|-------------------------------|-------------|--------------------------------------------------------------------|------|-------------------------|---------|-------------------------|
|                                               |                               |             |                                                                    | n    | IL-6 (pg/mL, mean ± SD) | n       | IL-6 (pg/mL, mean ± SD) |
| <b>2. Retinal artery occlusion (RAO)</b>      |                               |             |                                                                    |      |                         |         |                         |
| 199                                           | Kramer et al, 2005            | Israel      | RAO: 67.1 ± 1.8<br>Control: 71.4 ± 1.8                             | 8    | 2.6 ± 4.3               | 7       | 28.7 ± 36.0             |
| <b>Age-related macular degeneration (AMD)</b> |                               |             |                                                                    |      |                         |         |                         |
| <b>1. AMD<sup>a</sup></b>                     |                               |             |                                                                    |      |                         |         |                         |
| 200                                           | Agawa et al, 2014             | Japan       | AMD: 71.2 ± 8.1<br>Control: 67.8 ± 12.2                            | 37   | 8.4 ± 15.5              | 28      | 174.2 ± 225.9           |
| 201                                           | Chalam et al, 2014            | USA         | AMD: 73.7 ± 8.6<br>Control: 72.8 ± 7.0                             | 30   | 17.1 ± 21.3             | 30      | 5.1 ± 2.2               |
| 202                                           | Feng et al, 2018              | China       | AMD: 68.78 ± 8.23<br>Control: 76.12 ± 5.30                         | 18   | 49.51 ± 119.18          | 8       | 70.71 ± 91.50           |
| 203                                           | Mimura et al, 2019*           | Japan       | AMD: 75.7 ± 5.4<br>Control: 77.1 ± 8.1                             | 13   | 50.98 ± 24.03           | 14      | 17.48 ± 6.33            |
| 204                                           | Motohashi et al, 2017         | Japan       | AMD: 76.3 ± 5.5<br>Control: 73.7 ± 4.9                             | 30   | 17.4 ± 47.7             | 10      | 1.42 ± 2.14             |
| 205                                           | Ten Berge et al, 2019* (a)    | Netherlands | AMD: 82.5 ± 6.5<br>Control: 57.25 ± 16.5                           | 12   | 33.25 ± 25.75           | 22      | 39 ± 37.5               |
| <b>2. Dry AMD</b>                             |                               |             |                                                                    |      |                         |         |                         |
| 206                                           | Kramer et al, 2012 (a)        | Israel      | Moderate AMD: 79 ± 8<br>Control: 75 ± 8<br>Dry AMD: 83.5 ± 6.9     | 16   | 637 ± 1010              | 18      | 351 ± 516               |
| 207                                           | Spindler et al, 2018 (a)      | Switzerland | Control: 74.7 ± 5.6                                                | 25   | 3.4 ± 1.8               | 20      | 4.7 ± 7.1               |
| <b>3. Wet AMD</b>                             |                               |             |                                                                    |      |                         |         |                         |
| 208                                           | Fauser et al, 2015            | Germany     | Wet AMD: 81 ± 7<br>Control: 79 ± 7                                 | 17   | 53 ± 168                | 17      | 5 ± 12                  |
| 209                                           | Jonas et al, 2012 (a)         | Germany     | Wet AMD: 80.8 ± 6.4<br>Control: 77.0 ± 9.9<br>Advanced AMD: 79 ± 8 | 18   | 154 ± 327.25            | 20      | 6.42 ± 17.28            |
| 210                                           | Kramer et al, 2012 (b)        | Israel      | Control: 75 ± 8                                                    | 16   | 886 ± 1201              | 18      | 351 ± 516               |
| 211                                           | Miao et al, 2012              | China       | Wet AMD: 68.6 ± 12<br>Control: 62.4 ± 14.5                         | 17   | 3.6 ± 1.8               | 14      | 4.47 ± 2.07             |
| 212                                           | Rezar-Dreindl et al, 2016 (a) | Austria     | Wet AMD (1): 77 ± 7.1<br>Control: NA                               | 20   | 3.5 ± 8.9               | 15      | 1.4 ± 1.0               |
| 213                                           | Rezar-Dreindl et al, 2016 (b) | Austria     | Wet AMD (2): 75 ± 7.5<br>Control: NA                               | 20   | 1.8 ± 5.4               | 15      | 1.4 ± 1.0               |
| 214                                           | Sakurada et al, 2015          | Japan       | Wet AMD: 74.6 ± 9.6<br>Control: 73.0 ± 6.3                         | 18   | 10.9 ± 13.8             | 20      | 9.9 ± 12.6              |
| 215                                           | Sato et al, 2018              | Japan       | Wet AMD: 69.0 ± 10.2<br>Control: 73.7 ± 9.43                       | 21   | 6.51 ± 5.24             | 17      | 78.2 ± 100              |
| 216                                           | Spindler et al, 2018 (b)      | Switzerland | Treated wet AMD: 84.9 ± 5.1<br>Control: 74.7 ± 5.6                 | 19   | 17.1 ± 21.3             | 20      | 4.7 ± 7.1               |
| 217                                           | Terao et al, 2018*            | Japan       | Wet AMD: 73.08 ± 1.83<br>Control: 73.5 ± 4                         | 18   | 7.43 ± 2.17             | 11      | 3.29 ± 0.36             |

| No.                                               | Study, year                 | Country     | Age <sup>a</sup>                                         | Case |                         | Control |                         |
|---------------------------------------------------|-----------------------------|-------------|----------------------------------------------------------|------|-------------------------|---------|-------------------------|
|                                                   |                             |             |                                                          | n    | IL-6 (pg/mL, mean ± SD) | n       | IL-6 (pg/mL, mean ± SD) |
| <b>Choroidal neovascularization (CNV)</b>         |                             |             |                                                          |      |                         |         |                         |
| 218                                               | Fan et al, 2018             | China       | Idiopathic CNV:<br>33.25 ± 8.69                          | 32   | 3.49 ± 2.41             | 9       | 4.43 ± 1.77             |
| 219                                               | Miao et al, 2012 (a)        | China       | Control: NA<br>Idiopathic CNV:<br>33.7±10.4              | 7    | 3.1 ± 1.5               | 14      | 4.47 ± 2.07             |
| 220                                               | Miao et al, 2012 (b)        | China       | Control: 62.4 ± 14.5<br>CNV (Pathologic Myopia): 49.4±10 | 10   | 4.9 ± 2.0               | 14      | 4.47 ± 2.07             |
| 221                                               | Roh et al, 2009 (c)         | Korea       | Control: 62.4 ± 14.5<br>Naive CNV (AMD):<br>66.0 ± 16.2  | 19   | 14.5 ± 13.1             | 10      | 20.9 ± 30.5             |
| 222                                               | Roh et al, 2009 (d)         | Korea       | Control: 66.0 ± 7.5<br>Reccurent CNV (AMD): 71.4 ± 5.1   | 14   | 46.9 ± 59.5             | 10      | 20.9 ± 30.5             |
| 223                                               | Roh et al, 2009 (e)         | Korea       | Control: 66.0 ± 7.5<br>Regressed CNV (AMD): 64.5 ± 5.9   | 17   | 46.4 ± 70.5             | 10      | 20.9 ± 30.5             |
| 224                                               | Roh et al, 2010             | Korea       | Control: 66.0 ± 7.5<br>CNV (AMD): 66.0 ± 6.2             | 10   | 73.5 ± 172.1            | 9       | 9.5 ± 14.6              |
|                                                   |                             |             | Control: 63.4 ± 7.0                                      |      |                         |         |                         |
| <b>Pachychoroid spectrum diseases</b>             |                             |             |                                                          |      |                         |         |                         |
| <b>1. Central serous chorioretinopathy (CSC)</b>  |                             |             |                                                          |      |                         |         |                         |
| 225                                               | Jung et al, 2014            | Korea       | CSC: 48.77 ± 7.71                                        | 39   | 0.32 ± 0.79             | 25      | 0.46 ± 0.59             |
| 226                                               | Shin and Lim, 2011          | Korea       | Control: NA<br>CSC: 46.4 ± 8.7                           | 20   | 1.6 ± 0.5               | 20      | 2.1 ± 1.4               |
|                                                   |                             |             | Control: 49.8 ± 10.7                                     |      |                         |         |                         |
| <b>2. Pachychoroid neovascularopathy (PNV)</b>    |                             |             |                                                          |      |                         |         |                         |
| 227                                               | Feng et al, 2018            | China       | PNV: 73.43 ± 8.01                                        | 7    | 191.14 ± 315.93         | 8       | 70.71 ± 91.50           |
| 228                                               | Terao et al, 2018*          | Japan       | Control: 76.12 ± 5.30<br>PNV: 67.7 ± 3.95                | 18   | 4.71 ± 2.72             | 11      | 3.29 ± 0.36             |
|                                                   |                             |             | Control: 73.5 ± 4                                        |      |                         |         |                         |
| <b>3. Polypoidal choroidal vasculopathy (PCV)</b> |                             |             |                                                          |      |                         |         |                         |
| 229                                               | Hu et al, 2016 (a)          | Australia   | Refractory PCV:<br>62.59 ± 7.92                          | 41   | 8.59 ± 12.94            | 44      | 10.02 ± 8.93            |
| 230                                               | Hu et al, 2016 (b)          | Australia   | Control: 73.0 ± 6.3<br>Stable PCV: 62.56 ± 9.67          | 39   | 5.74 ± 7.77             | 44      | 10.02 ± 8.93            |
| 231                                               | Sakurada et al, 2015        | Japan       | Control: 73.0 ± 6.3<br>PCV: 72.6 ± 9.2                   | 22   | 13.0 ± 43.4             | 20      | 9.9 ± 12.6              |
|                                                   |                             |             | Control: 73.0 ± 6.3                                      |      |                         |         |                         |
| <b>Retinal detachment (RD)</b>                    |                             |             |                                                          |      |                         |         |                         |
| 232                                               | Asensio-Sánchez et al, 2015 | Spain       | RD: 64.8 ± 11.4                                          | 20   | 122.4 ± 16              | 20      | 46 ± 23                 |
| 233                                               | Garweg et al, 2019          | Switzerland | Control: 68.7 ± 11.7<br>RD: 59.0 14.6/66.9 ± 12.0        | 71   | 121.9 ± 343.5           | 26      | 9.5 ± 20.2              |
| 234                                               | Kunikata et al, 2013        | Japan       | Control: 66.7 ± 9.1<br>RRD: NA                           | 19   | 261 ± 674               | 17      | 21 ± 23                 |
| 235                                               | Takahashi et al, 2016       | Japan       | Control: NA<br>RRD: 61.2 ± 9.3                           | 28   | 517.0 ± 1931.5          | 14      | 77.3 ± 278.0            |
| 236                                               | Yoshimura et al, 2009*      | Japan       | Control: NA<br>RRD: 61.4 ± 10.5                          | 63   | 4203.55 ± 3837.75       | 83      | 65.25 ± 44.2            |
|                                                   |                             |             | Control: 66.4 ± 7.8                                      |      |                         |         |                         |

| No.                                          | Study, year                      | Country     | Age <sup>a</sup>                                              | Case |                         | Control |                         |
|----------------------------------------------|----------------------------------|-------------|---------------------------------------------------------------|------|-------------------------|---------|-------------------------|
|                                              |                                  |             |                                                               | n    | IL-6 (pg/mL, mean ± SD) | n       | IL-6 (pg/mL, mean ± SD) |
| <b>Proliferative vitreoretinopathy (PVR)</b> |                                  |             |                                                               |      |                         |         |                         |
| 237                                          | Benerje et al, 2007*             | USA         | PVR: NA<br>Control: NA                                        | 8    | 975 ± 3545.5            | 8       | 6 ± 6.25                |
| 238                                          | Canataroglu et al, 2005 (a)      | Turkey      | PVR: 47<br>Control: 41.1                                      | 10   | 99.96 ± 138.67          | 15      | 0.45 ± 0.79             |
| 239                                          | Canataroglu et al, 2005 (b)      | Turkey      | Traumatic PVR: 26.2<br>Control: 41.1                          | 10   | 236.20 ± 107.11         | 15      | 0.45 ± 0.79             |
| 240                                          | Kauffmann et al, 1994            | Netherland  | PVR: 60.2 ± 3.4<br>Control: 63 ± 6.9                          | 15   | 1147 ± 1832             | 11      | 40 ± 68                 |
| 241                                          | Yamamoto et al, 2003             | Japan       | PVR: NA<br>Control: NA                                        | 9    | 888.6 ± 1012.4          | 8       | 28.1 ± 17.1             |
| <b>Retinopathy of prematurity (ROP)</b>      |                                  |             |                                                               |      |                         |         |                         |
| 242                                          | Sato et al, 2009* (a)            | Japan       | Active ROP: NA<br>Control: NA                                 | 12   | 97.7 ± 35.2             | 6       | 1.35 ± 1.0              |
| 243                                          | Sato et al, 2009* (b)            | Japan       | Inactive ROP: NA<br>Control: NA                               | 15   | 188.33 ± 132.18         | 6       | 1.35 ± 1.0              |
| <b>Coats' disease</b>                        |                                  |             |                                                               |      |                         |         |                         |
| 244                                          | Feng et al, 2017* (a)            | China       | Coats' disease (child): 6.45 ± 1.97<br>Control: 3.50 ± 0.96   | 12   | 28.17 ± 15.44           | 6       | 6.60 ± 2.12             |
| 245                                          | Feng et al, 2017* (b)            | China       | Coats' disease (adult): 32.75 ± 9.36<br>Control: 62.59 ± 4.19 | 8    | 58.96 ± 46.57           | 10      | 7.64 ± 4.64             |
| <b>Retinitis pigmentosa (RP)</b>             |                                  |             |                                                               |      |                         |         |                         |
| 246                                          | Ten Berge et al, 2019*           | Netherland  | RP: 53.25 ± 15.25<br>Control: 57.25 ± 16.5                    | 25   | 37.25 ± 34.75           | 22      | 39 ± 37.5               |
| 247                                          | Yoshida et al, 2013              | Japan       | RP: 64.7 ± 12.2<br>Control: 67.4 ± 7.5                        | 14   | 21.1 ± 14.0             | 20      | 3.4 ± 0.00              |
| <b>Epiretinal membrane (ERM)</b>             |                                  |             |                                                               |      |                         |         |                         |
| 248                                          | Takahashi et al, 2016            | Japan       | ERM: NA<br>Control: NA                                        | 9    | 112.0 ± 303.75          | 14      | 77.3 ± 278.0            |
| 249                                          | Zandi et al, 2016                | Switzerland | ERM: 73 ± 8.5<br>Control: 71 ± 8.2                            | 31   | 5.33 ± 3.30             | 30      | 0.80 ± 1.55             |
| <b>Others</b>                                |                                  |             |                                                               |      |                         |         |                         |
| 250                                          | Jakobsson et al, 2015            | Sweden      | Pseudophakia: 71.9 ± 8.43<br>Control: 68.3 ± 7.31             | 40   | 18.9 ± 20.5             | 33      | 18.4 ± 19.0             |
| 251                                          | Sauer et al., 2016               | France      | Congenital cataract: 3.8 months<br>Control: 72                | 18   | 655.1 ± 356.5           | 20      | 67.0 ± 54.2             |
| 252                                          | Suzuki et al, 2019               | Japan       | PBK: 73.8 ± 10.5<br>Control: 75.9 ± 7.6                       | 62   | 2127 ± 495              | 33      | 85 ± 69                 |
| 253                                          | Zhu et al, 2016 (a) <sup>c</sup> | China       | HMC: 61.83 ± 8.69<br>Control: 63.35 ± 9.26                    | 45   | 6.23 ± 1.50             | 35      | 19.78 ± 22.75           |
| 254                                          | Zhu et al, 2016 (b) <sup>c</sup> | China       | HMC: 61.83 ± 8.69<br>Control: 63.35 ± 9.26                    | 15   | 6.77 ± 4.01             | 15      | 0.00 ± 0.00             |

<sup>a</sup>Age was expressed as mean or mean ± SD; <sup>b</sup>Did not stratify based on clinical classification or etiology; <sup>c</sup>quantified with both methods. \* Indicate the mean and SD were estimated from median, range, and the size of the sample as previously described<sup>1,2</sup>. BSCR, birdshot chorioretinopathy/birdshot uveitis/HLA-A29 uveitis; CMO, cystoid macular oedema; CMV, cytomegalovirus; CSMO, clinically significant macular oedema; DRT, diffuse retinal thickening; DVR, diabetic vitreoretinopathy; ED, Eales disease; FHC, fuchs' heterochromic cyclitis; H-CRVO, hemi-central retinal vein occlusion; HLA, human leukocyte antigen; HMC, high myopia cataract; I-CRVO, ischemic-central retinal vein occlusion; IU, Idiopathic uveitis; LIU, lens-induced uveitis; NA, not available; NI-CRVO, non-ischemic-central retinal vein occlusion; NVG, neovascular glaucoma; NVI, iris neovascularization; PBK, pseudophakic bullous keratopathy; PEXG, pseudoexfoliative glaucoma; PRP, pan-retinal photocoagulation; PSS, posner-schlossman

syndrome; RRD, rhegmatogenous retinal detachment; SRD, serous retinal detachment; TAU, tuberculosis associated uveitis, TRD, tractional retinal detachment, TU, toxoplasma uveitis; UG, uveitic glaucoma; VB, vitreous bleeding; VH, vitreous hemorrhage.

**Supplemental Table S4.** Meta-analysis for the association between intraocular IL-6 levels and ocular disease stratified by the type of disease

| No. | Group                          | No. of study | Subjects | Method <sup>a</sup> | Effect estimate<br>SMD [95% CI] | Heterogeneity |                       | Assoc.<br>(P) | P<br>Egger's<br>test |
|-----|--------------------------------|--------------|----------|---------------------|---------------------------------|---------------|-----------------------|---------------|----------------------|
|     |                                |              |          |                     |                                 | P             | I <sup>2</sup><br>(%) |               |                      |
| 1   | Overall                        | 254          | 11014    | Random              | 1.41 [1.24, 1.58]               | <0.00001      | 92                    | <0.00001      | 0.000                |
| 2   | Glaucoma                       | 30           | 1606     | Random              | 0.80 [0.26, 1.35]               | <0.00001      | 95                    | 0.004         | 0.169                |
| 2a  | POAG                           | 15           | 775      | Random              | 0.15 [-0.48, 0.78]              | <0.00001      | 94                    | 0.64          | 0.228                |
| 2b  | PACG                           | 4            | 168      | Random              | 0.52 [-0.09, 1.14]              | 0.01          | 72                    | 0.09          | 0.066                |
| 2c  | Secondary glaucoma             | 11           | 663      | Random              | 1.84 [0.59, 3.09]               | <0.00001      | 97                    | 0.004         | 0.164                |
| 3   | PEX syndrome                   | 7            | 309      | Random              | 1.56 [0.19, 2.93]               | <0.00001      | 96                    | 0.03          | 0.051                |
| 4   | Ocular inflammation            | 33           | 892      | Random              | 1.75 [1.25, 2.25]               | <0.00001      | 87                    | <0.00001      | 0.004                |
| 4a  | Surface ocular inflammation    | 2            | 62       | Random              | 4.43 [-1.66, 10.52]             | <0.00001      | 94                    | 0.15          | NA                   |
| 4b  | Intraocular inflammation       | 31           | 899      | Random              | 1.62 [1.15, 2.09]               | <0.00001      | 86                    | <0.00001      | 0.003                |
| 4b1 | Uveitis*                       | 7            | 179      | Random              | 0.67 [-0.45, 1.79]              | <0.00001      | 87                    | 0.24          | 0.063                |
| 4b2 | Infectious                     | 5            | 213      | Random              | 2.22 [0.94, 3.49]               | <0.00001      | 90                    | 0.0007        | 0.595                |
| 4b3 | Inflammatory                   | 12           | 301      | Random              | 2.03 [1.35, 2.72]               | <0.00001      | 79                    | <0.00001      | 0.002                |
| 4b4 | Pseudo-uveitis                 | 3            | 110      | Random              | 1.81 [0.17, 3.45]               | <0.0001       | 90                    | 0.03          | 0.415                |
| 4b5 | Ophthalmologic entities        | 4            | 96       | Random              | 1.05 [0.59, 1.51]               | 0.62          | 0                     | <0.00001      | 0.384                |
| 5   | Diabetic retinopathy           | 48           | 2568     | Random              | 2.21 [1.74, 2.69]               | <0.00001      | 95                    | <0.00001      | 0.000                |
| 5a  | DR*                            | 13           | 901      | Random              | 1.97 [1.17, 2.76]               | <0.00001      | 95                    | <0.00001      | 0.001                |
| 5b  | PDR                            | 30           | 1518     | Random              | 2.17 [1.55, 2.78]               | <0.00001      | 95                    | <0.00001      | 0.000                |
| 5c  | NPDR                           | 5            | 149      | Random              | 5.55 [2.67, 8.42]               | <0.00001      | 96                    | 0.0002        | 0.025                |
| 6   | Macular oedema                 | 36           | 1510     | Random              | 1.48 [1.14, 1.82]               | <0.00001      | 86                    | <0.00001      | 0.000                |
| 6a  | DMO                            | 34           | 196      | Random              | 1.52 [1.16, 1.89]               | <0.00001      | 87                    | <0.00001      | 0.000                |
| 6b  | Non-DMO                        | 2            | 114      | Random              | 0.87 [0.42, 1.31]               | 0.0001        | 0                     | 0.34          | NA                   |
| 7   | Retinal vascular occlusion     | 45           | 1782     | Random              | 1.68 [1.29, 2.07]               | <0.00001      | 90                    | <0.00001      | 0.000                |
| 7a  | RVO                            | 3            | 128      | Random              | 1.22 [0.03, 2.41]               | 0.0006        | 87                    | 0.04          | 0.453                |
| 7b  | CRVO                           | 21           | 723      | Random              | 1.99 [1.37, 2.61]               | <0.00001      | 90                    | <0.00001      | 0.008                |
| 7c  | BRVO                           | 20           | 916      | Random              | 1.58 [1.00, 2.15]               | <0.00001      | 90                    | <0.00001      | 0.006                |
| 8   | AMD                            | 18           | 682      | Random              | 0.29 [-0.07, 0.65]              | <0.00001      | 80                    | 0.11          | 0.021                |
| 8a  | AMD*                           | 6            | 252      | Random              | 0.33 [-0.47, 1.14]              | <0.00001      | 88                    | 0.42          | 0.285                |
| 8b  | Dry AMD                        | 2            | 79       | Random              | 0.02 [-0.58, 0.62]              | <0.00001      | 44                    | 0.94          | NA                   |
| 8c  | Wet AMD                        | 10           | 351      | Random              | 0.33 [-0.13, 0.79]              | <0.00001      | 77                    | 0.16          | 0.110                |
| 9   | CNV                            | 7            | 209      | Random              | 0.07 [-0.29, 0.43]              | 0.16          | 35                    | 0.72          | 0.729                |
| 10  | Pachychoroid spectrum diseases | 7            | 358      | Random              | -0.11 [-0.39, 0.16]             | 0.14          | 38                    | 0.42          | 0.99                 |
| 11  | RD                             | 5            | 361      | Random              | 1.23 [0.31, 2.15]               | <0.00001      | 92                    | 0.008         | 0.144                |
| 12  | PVR                            | 5            | 109      | Random              | 1.27 [0.42, 2.11]               | 0.005         | 73                    | 0.003         | 0.063                |
| 13  | ROP                            | 2            | 32       | Random              | 2.27 [0.68, 3.86]               | 0.10          | 62                    | 0.005         | NA                   |
| 14  | Coats' disease                 | 2            | 36       | Random              | 1.59 [0.79, 2.38]               | 0.98          | 0                     | <0.0001       | NA                   |
| 15  | RP                             | 2            | 81       | Random              | 0.92 [-1.02, 2.86]              | 0.0001        | 93                    | 0.35          | NA                   |
| 16  | ERM                            | 2            | 84       | Random              | 0.95 [-0.63, 2.53]              | 0.002         | 89                    | 0.24          | NA                   |
| 17  | Others                         | 5            | 326      | Random              | 1.77 [-0.17, 3.72]              | <0.00001      | 98                    | 0.07          | 0.052                |

Assoc., test of association. \*Did not stratify based on clinical classification or etiology. AMD, age-related macular degeneration; BRVO, branch retinal vein occlusion; CNV, choroidal neovascularization; CRVO, central retinal vein occlusion; DMO, diabetic macular oedema; DR, diabetic retinopathy; ERM, epiretinal membrane; NPDR, non-proliferative diabetic retinopathy; PACG, primary angle-closure glaucoma; PDR, proliferative diabetic retinopathy; PEX, pseudoexfoliation syndrome; POAG, primary open-angle glaucoma; PVR, proliferative vitreoretinopathy; RD, retinal detachment; ROP, retinopathy of prematurity; RP, retinitis pigmentosa; RVO, retinal vein occlusion.

**Supplemental Table S5.** Meta-analysis for the association between intraocular IL-6 levels and ocular disease stratified by ethnicity, type of sample, and quantification method.

| Contrast              | Group                                     | No. of study | Method | Effect estimate SMD [95% CI] | Heterogeneity |                    | Assoc. (P) |
|-----------------------|-------------------------------------------|--------------|--------|------------------------------|---------------|--------------------|------------|
|                       |                                           |              |        |                              | P             | I <sup>2</sup> (%) |            |
| Ethnicity             | Asian                                     | 164          | Random | 1.72 [1.49, 1.95]            | 0.000         | 94                 | <0.001     |
|                       | Caucasian                                 | 85           | Random | 0.94 [0.70, 1.18]            | 0.000         | 89                 | <0.001     |
|                       | Middle eastern                            | 5            | Random | 0.03 [-2.59, 2.65]           | 0.000         | 98                 | 0.981      |
| Type of sample        | Aqueous humor                             | 180          | Random | 1.30 [1.10, 1.51]            | 0.000         | 92                 | <0.001     |
|                       | Vitreous humor                            | 74           | Random | 1.68 [1.38, 1.97]            | 0.000         | 92                 | <0.001     |
|                       | ELISA                                     | 80           | Random | 2.48 [2.03, 2.94]            | 0.000         | 95                 | <0.001     |
| Quantification method | Multiplex bead immunoassay or immunoarray | 174          | Random | 1.04 [0.87, 1.21]            | 0.000         | 90                 | <0.001     |

Assoc., test of association. ELISA, enzyme-linked immunosorbent assay.

**Supplemental Table S6.** Meta-regression analysis with the aid of year of publication, type of disease, type of sample, quantification method, ethnicity, and sample size on IL-6 levels in ocular disease

| Variable              | Method | Coefficients | 95% CI          | P-value |
|-----------------------|--------|--------------|-----------------|---------|
| Year of publication   | Random | -0.004       | [-0.053, 0.046] | 0.883   |
| Type of disease       | Random | 0.810        | [0.092, 1.527]  | 0.027   |
| Type of sample        | Random | 0.275        | [-0.305, 0.854] | 0.353   |
| Quantification method | Random | 1.388        | [0.826, 1.951]  | <0.001  |
| Ethnicity             | Random | 1.019        | [0.573, 1.464]  | 0.004   |
| Sample size           | Random | 0.003        | [-0.006, 0.012] | 0.515   |

- Type of disease: 1-Glaucoma; 2-PEX (pseudoexfoliation) syndrome; 3-Ocular inflammation; 4-Diabetic retinopathy; 5-Macular oedema; 6-Vascular occlusion; 7-AMD (age-related macular degeneration); 8-CNV (choroidal neovascularization); 9- Pachychoroid spectrum diseases; 10-RD (retinal detachment); 11-PVR (proliferative vitreoretinopathy); 12-ROP (retinopathy of prematurity); 13- Coats' disease; 14-RP (retinitis pigmentosa); 15-ERM (epiretinal membrane); 16-Others.
- Type of sample: 1-Aqueous humor; 2-Vitreous humor.
- Quantification method: 1-ELISA (enzyme-linked immunosorbent assay) ; 2-Multiplex bead immunoassay or immunoarray.
- Ethnicity: 1-Asian; 2-Caucasian; 3-Middle Eastern.

**Supplemental Table S7.** Network meta-analysis for DMO pattern based on optical coherence tomography (OCT)

| DRT                  |  | CMO                  |  | SRD                 |  | Control |  |
|----------------------|--|----------------------|--|---------------------|--|---------|--|
| 0.17 [-1.22 – 1.55]  |  |                      |  |                     |  |         |  |
| -0.75 [-2.33 – 0.82] |  | -0.89 [-4.31 – 2.54] |  |                     |  |         |  |
| 3.74 [1.30 – 6.18]*  |  | 2.36 [0.92 – 3.80]*  |  | 1.97 [1.43 – 2.51]* |  |         |  |

\*P < 0.05. CMO, cystoid macular oedema; DRT, diffuse retinal thickening; SRD, serous retinal detachment.

## Meta-analysis to estimate IL-6 levels in tears of patient with surface ocular diseases

A literature search was conducted from PubMed, Scopus and Web of Science databases up to December 2019 using the following keywords and their combination such as “IL-6 or interleukin-6”, “cytokine”, “inflammation”, and “surface eye disease/ophthalmology”. For study selection, data extraction and statistical analysis see the method section of this article. A total of 140 relevant studies were initially screened. After reviewing the titles, abstract, duplications and availability full-text of abstract, 29 articles were excluded. One hundred ten studies were further evaluated, 80 were excluded (unable to extract the data (n=21), not a case-control study (n=29), not related with surface ocular disease (n=14), review and animal model (n=4), other methods, measuring other than IL-6, collecting sample other than tears (n=9). Therefore, 34 studies were included in this meta-analysis (**Supplemental Table S8**). IL-6 levels in tears of patients with surface ocular disease displayed a significant increase compared to the control subjects (SMD = 2.07, 95% CI = 1.67 – 2.48, P < 0.00001, **Supplemental Fig. S9**). Although publication bias existed (PEgger’s test < 0.05) and the trim and fill method was used, the results remain identical.

**Supplemental Table S8.** Summary of the studies for the IL-6 levels in tears between patients with surface ocular disease and the control subjects

| No. | Study, year                      | Country   | Age <sup>a</sup>                  | Case |                         | Control |                         |                   |     |                                        |   |              |   |              |
|-----|----------------------------------|-----------|-----------------------------------|------|-------------------------|---------|-------------------------|-------------------|-----|----------------------------------------|---|--------------|---|--------------|
|     |                                  |           |                                   | n    | IL-6 (pg/mL, mean ± SD) | n       | IL-6 (pg/mL, mean ± SD) |                   |     |                                        |   |              |   |              |
| 1   | Acere et al, 2008                | Chile     | CCh: 62 ± 7.1                     | 25   | 51.78 ± 81.53           | 18      | 8.15 ± 2.73             |                   |     |                                        |   |              |   |              |
|     |                                  |           | Control: 40 ± 12.21               |      |                         |         |                         |                   |     |                                        |   |              |   |              |
|     |                                  |           | Blepharitis: 44 ± 9.8             |      |                         |         |                         |                   |     |                                        |   |              |   |              |
|     |                                  |           | Control: 40 ± 12.21               |      |                         |         |                         |                   |     |                                        |   |              |   |              |
| 2   | Benitez-del-Castillo et al, 2018 | Spain     | DED: 52 ± 15                      | 30   | 18.0 ± 6.4              | 36      | 12.1 ± 8.6              |                   |     |                                        |   |              |   |              |
|     |                                  |           | Control: 50 ± 12                  |      |                         |         |                         |                   |     |                                        |   |              |   |              |
|     |                                  |           | 3                                 |      |                         |         |                         | Chao et al, 2018* | USA | Asymptomatic CL/Control: between 18-40 | 9 | 17.3 ± 1.025 | 9 | 16.1 ± 1.025 |
|     |                                  |           |                                   |      |                         |         |                         |                   |     | Asymptomatic CL (a): 25.67 ± 7.75      |   |              |   |              |
| 4   | Yüksel Elgin et al, 2015         | Turkey    | Control: 25.75 ± 8.24             | 9    | 2643.7 ± 259.49         | 9       | 2634.49 ± 251.99        |                   |     |                                        |   |              |   |              |
|     |                                  |           | Asymptomatic CL (b): 24.78 ± 5.95 |      |                         |         |                         |                   |     |                                        |   |              |   |              |
|     |                                  |           | Control: 25.75 ± 8.24             |      |                         |         |                         |                   |     |                                        |   |              |   |              |
| 5   | Erdogan-Poyraz et al, 2009       | Turkey    | CCh1-3: 63.4 ± 6.9                | 16   | 14.9 ± 2.3              | 10      | 13.9 ± 1.1              |                   |     |                                        |   |              |   |              |
|     |                                  |           | Control: 63.1 ± 6.3               |      |                         |         |                         |                   |     |                                        |   |              |   |              |
|     |                                  |           | 21                                |      |                         |         |                         | 32.4 ± 14.0       | 10  | 13.9 ± 1.1                             |   |              |   |              |
| 6   | Fodor et al, 2006                | Hungary   | Bacterial conjunctivitis          | 11   | 366 ± 296               | 52      | 110 ± 142               |                   |     |                                        |   |              |   |              |
|     |                                  |           | Corneal foreign body              |      |                         |         |                         |                   |     |                                        |   |              |   |              |
|     |                                  |           | 7                                 |      |                         |         |                         | 109 ± 72          | 52  | 110 ± 142                              |   |              |   |              |
| 7   | Gonzalez-Perez et al, 2012       | Spain     | Asymptomatic CL (a): 25.4 ± 65.04 | 28   | 2.6 ± 0.6               | 32      | 2.2 ± 0.5               |                   |     |                                        |   |              |   |              |
|     |                                  |           | Control: 26.72 ± 5.12             |      |                         |         |                         |                   |     |                                        |   |              |   |              |
|     |                                  |           | Asymptomatic CL (b): 27.00 ± 7.38 |      |                         |         |                         |                   |     |                                        |   |              |   |              |
| 8   | Jackson et al, 2016              | Australia | Control: 26.72 ± 5.12             | 32   | 4.7 ± 1.2               | 32      | 2.2 ± 0.5               |                   |     |                                        |   |              |   |              |
|     |                                  |           | DED: 43.4 ± 2.0                   |      |                         |         |                         |                   |     |                                        |   |              |   |              |
|     |                                  |           | Control: 40.6 ± 3.6               |      |                         |         |                         |                   |     |                                        |   |              |   |              |
| 9   | Jun et al, 2011                  | USA       | VKC: 43                           | 18   | 282.7 ± 467.7           | 11      | 89.5 ± 83.5             |                   |     |                                        |   |              |   |              |
|     |                                  |           | Control: 33                       |      |                         |         |                         |                   |     |                                        |   |              |   |              |
| 10  | Jung et al, 2016                 | Korea     | MGD: 69.8 ± 10.4                  | 15   | 87.53 ± 41.46           | 35      | 47.94 ± 31.07           |                   |     |                                        |   |              |   |              |
|     |                                  |           | Control: 65.8 ± 9.93              |      |                         |         |                         |                   |     |                                        |   |              |   |              |



| No. | Study, year             | Country | Age <sup>a</sup>                                                                             | Case |                         | Control |                         |
|-----|-------------------------|---------|----------------------------------------------------------------------------------------------|------|-------------------------|---------|-------------------------|
|     |                         |         |                                                                                              | n    | IL-6 (pg/mL, mean ± SD) | n       | IL-6 (pg/mL, mean ± SD) |
| 11  | Lam et al, 2009         | USA     | DTS: 55.2 ± 16.4<br>Control: 45 ± 17.3                                                       | 30   | 238.0 ± 278.2           | 14      | 26.5 ± 21.8             |
| 12  | Landsend et al, 2018    | Norway  | Aniridia+MGD: 34.9 ± 18.7<br>Control: range 31.2 ± 13.9                                      | 35   | 6.5 ± 6.6               | 21      | 1.7 ± 1.8               |
| 13  | Lee et al, 2013         | Korea   | (SS) DED: 55.9 ± 9.96<br>Control: 52.8 ± 13.19                                               | 40   | 19220 ± 20110           | 35      | 6970 ± 6730             |
| 14  | Lema and Durán, 2005*   | Spain   | (Non-SS) DED: 55.4 ± 12.44<br>Control: 52.8 ± 13.19                                          | 40   | 12120 ± 13540           | 35      | 6970 ± 6730             |
| 15  | Lema et al, 2009*       | Spain   | KC: 22.4 ± 6.5<br>Control: 22.6 ± 6.6                                                        | 28   | 29.0 ± 1.5              | 20      | 9.5 ± 0.775             |
| 16  | Leonardi et al, 1998    | Italy   | KC: 27.1 ± 8.1<br>Control: 22.6 ± 6.6                                                        | 30   | 22.8 ± 0.5              | 20      | 9.5 ± 0.775             |
| 17  | Massingale et al, 2009  | USA     | Subclinical KC: 27.1 ± 8.1<br>Control: 22.6 ± 6.6                                            | 30   | 22.1 ± 0.425            | 20      | 9.5 ± 0.775             |
| 18  | Matsumura et al, 2017   | Japan   | VKC tarsal: 12.8 ± 1.0<br>Control: NA                                                        | 10   | 28.0 ± 43.9             | 14      | 0.00 ± 0.00             |
| 19  | McDonnell et al, 2017   | USA     | VKC limbal: 12.8 ± 1.0<br>Control: NA                                                        | 9    | 58.5 ± 161.3            | 14      | 0.00 ± 0.00             |
| 20  | Mrugacz et al, 2017     | Poland  | DED: 52.8 ± 10.8<br>Control: 50.3 ± 9.4                                                      | 7    | 1625.7 ± 430.9          | 7       | 632.3 ± 167.9           |
| 21  | Nivenius et al, 2011*   | Sweden  | LDO: 26.9 ± 28.7<br>Control: NA                                                              | 15   | 666 ± 532               | 15      | 28.0 ± 46.3             |
| 22  | Oray and Toker, 2013    | Turkey  | months<br>DED: 63.2 ± 10.5<br>Control: 61.1 ± 11.2                                           | 217  | 147.45 ± 476.145        | 67      | 104.72 ± 290.994        |
| 23  | Pflugfelder et al, 1999 | USA     | DED: 44.21<br>Control: 44.85                                                                 | 32   | 37790 ± 11280           | 34      | 6470 ± 2100             |
| 24  | Saeki et al., 2017      | Japan   | AKC: 46<br>Control: NA                                                                       | 11   | 778 ± 25.5              | 5       | 286 ± 10                |
| 25  | Sakimoto et al, 2014    | Japan   | SAC: NA<br>Control: NA                                                                       | 5    | 613 ± 15.25             | 5       | 286 ± 10                |
| 26  | Santacruz et al, 2015   | Mexico  | VKC/Control: 11.3 ± 4.3<br>(SS)<br>keratoconjunctivitis sicca: 64 ± 8.3<br>Control: 26 ± 3.8 | 21   | 236.2 ± 307.4           | 15      | 106.6 ± 99.4            |
|     |                         |         | SBS: 37.3 ± 16.6<br>Control: 31.2 ± 10.2                                                     | 10   | 3690 ± 3200             | 10      | 290 ± 500               |
|     |                         |         | AC: 28.9 ± 14.5<br>Control: 31.2 ± 10.2                                                      | 22   | 15.8 ± 15.8             | 13      | 8.3 ± 8.3               |
|     |                         |         | AKC: 27.1 ± 13.6<br>Control: 31.2 ± 10.2                                                     | 14   | 11.5 ± 11.1             | 13      | 8.3 ± 8.3               |
|     |                         |         | VKC: 18.0 ± 5.8<br>Control: 31.2 ± 10.2                                                      | 14   | 21.2 ± 22.8             | 13      | 8.3 ± 8.3               |
|     |                         |         | noninfectious corneal ulcer: NA<br>Control: NA                                               | 21   | 48.2 ± 38.3             | 13      | 8.3 ± 8.3               |
|     |                         |         | Fungal keratitis: 49 ± 19<br>Control: 52 ± 19                                                | 16   | 1394 ± 1399             | 12      | 17.5 ± 20.3             |
|     |                         |         |                                                                                              | 14   | 4172 ± 1873             | 48      | 25 ± 17                 |

| No. | Study, year           | Country  | Age <sup>a</sup>                                               | Case |                         | Control |                         |
|-----|-----------------------|----------|----------------------------------------------------------------|------|-------------------------|---------|-------------------------|
|     |                       |          |                                                                | n    | IL-6 (pg/mL, mean ± SD) | n       | IL-6 (pg/mL, mean ± SD) |
|     | Santacruz et al, 2015 |          | Gram-positive bacterial keratitis: 65 ± 19<br>Control: 52 ± 19 | 8    | 758 ± 1166              | 48      | 25 ± 17                 |
|     |                       |          | Gram-negative bacterial keratitis: 51 ± 19<br>Control: 52 ± 19 | 6    | 1596 ± 971              | 48      | 25 ± 17                 |
| 27  | Shetty et al, 2015    | India    | KC: NA<br>Control: NA                                          | 12   | 4050 ± 730              | 10      | 2650 ± 890              |
| 28  | Shetty et al, 2017    | India    | KC: 28.8 ± 2<br>Control: 28.0 ± 3                              | 7    | 2413 ± 489              | 6       | 49 ± 21                 |
| 29  | Sorkhabi et al, 2014  | Iran     | KC: 24.09 ± 6.50<br>Control: 24.43 ± 4.55                      | 42   | 17.49 ± 1.92            | 30      | 13.81 ± 1.71            |
| 30  | Tai et al, 2019*      | Malaysia | ARC: 27.56 ± 14.90<br>Control: 29.75 ± 10.20                   | 25   | 1018.62 ± 373           | 20      | 74.36 ± 82.06           |
| 31  | Tishler et al, 1999   | Israel   | (SS) DED: 55.3 ± 6.3<br>Control: 60.1 ± 9.9                    | 12   | 88.6 ± 16.2             | 12      | 42.1 ± 10.6             |
| 32  | Ujhelyi et al, 2012*  | Hungary  | GO: 43.4 ± 15.2<br>Control: 38.6 ± 13.8                        | 54   | 752.51 ± 35.65          | 24      | 457.9 ± 21.44           |
|     |                       |          | Primary pterygia/control: 52 ± 4                               | 14   | 27.0 ± 8.0              | 37      | 17.0 ± 2.1              |
| 33  | Van Acker et al, 2019 | Belgium  | Reccurent pterygia/control: 52 ± 4                             | 7    | 41.5 ± 13.5             | 37      | 17.0 ± 2.1              |
|     |                       |          | Pinguecula/Control: 52 ± 4                                     | 5    | 30.8 ± 16.0             | 37      | 17.0 ± 2.1              |
|     |                       |          | (SS) DED: NA<br>Control: NA                                    | 20   | 9.46 ± 9.16             | 15      | 3.79 ± 4.31             |
| 34  | Zhao et al, 2018      | China    | (non-SS) DED: NA<br>Control: NA                                | 20   | 6.78 ± 7.63             | 15      | 3.79 ± 4.31             |
|     |                       |          | Evaporative DED/MGD: NA<br>Control: NA                         | 15   | 9.19 ± 9.98             | 15      | 3.79 ± 4.31             |

<sup>a</sup>Age was expressed as mean or mean ± SD. \*Indicate the mean and SD were estimated from median, range, and the size of the sample as previously described<sup>1,2</sup>. AC, allergic conjunctivitis; AKC, atopic keratoconjunctivitis; ARC, allergic rhinoconjunctivitis; CCh, conjunctivochalasis; CL, contact lens; DED, dry eye disease; DTS, dysfunctional tear syndrome; GO, graves' orbitopathy; KC, keratoconus; LDO, lacrimal duct obstruction; MGD, meibomian gland dysfunction; NA, not available; SAC, seasonal allergic conjunctivitis; SBS, sick building syndrome; SS, sjogren syndrome; TAO, thyroid-associated ophthalmopathy/orbitopathy; VKC, vernal keratoconjunctivitis.

**Supplemental Table S9.** Quality assessments of included case-control studies using the Newcastle Ottawa Scale<sup>3</sup>

**A. IL-6-174 G/C polymorphism**

| No. | Study, year                          | Selection |   |   |   | Comparability |       | Exposure |   |   | Total no. of stars |
|-----|--------------------------------------|-----------|---|---|---|---------------|-------|----------|---|---|--------------------|
|     |                                      | 1         | 2 | 3 | 4 | 1 (a)         | 1 (b) | 1 (a)    | 2 | 3 |                    |
| 1   | Lin et al, 2014                      | *         | * | * | * | *             | *     | *        | * | * | 9                  |
| 2   | Wang et al, 2017                     | *         | - | - | - | *             | *     | *        | * | * | 6                  |
| 3   | Wu et al, 2016                       | *         | * | * | * | *             | *     | *        | * | * | 9                  |
| 4   | Zimmermann et al, 2013               | *         | * | * | * | *             | *     | *        | * | * | 9                  |
| 5   | Goverdhan et al, 2008                | *         | * | * | * | *             | *     | *        | * | * | 9                  |
| 6   | Lu et al, 2016                       | *         | * | * | * | *             | *     | *        | * | * | 9                  |
| 7   | Masood et al, 2007                   | *         | * | * | * | *             | *     | *        | * | * | 9                  |
| 8   | Myśliwska et al, 2009                | *         | * | * | * | *             | *     | *        | * | * | 9                  |
| 9   | Paine et al, 2012                    | *         | * | * | * | *             | *     | *        | * | * | 9                  |
| 10  | Sanabria Ruiz-Colmenares et al, 2006 | *         | * | * | * | *             | *     | *        | * | * | 9                  |
| 11  | Anvari et al, 2009                   | *         | * | * | * | *             | -     | *        | * | * | 8                  |
| 12  | Bednarczuk et al, 2004               | *         | * | * | * | *             | *     | *        | * | * | 9                  |
| 13  | Carnt et al, 2012                    | *         | * | * | * | *             | -     | *        | * | * | 8                  |
| 14  | Cordeiro et al, 2013                 | *         | * | * | * | *             | *     | *        | * | * | 9                  |
| 15  | Dilek et al, 2009                    | *         | * | * | * | *             | *     | *        | * | * | 9                  |
| 16  | Ewald et al, 2015                    | *         | * | * | * | *             | -     | *        | * | * | 8                  |
| 17  | Gedvilaite et al, 2019               | *         | * | * | * | *             | *     | *        | * | * | 9                  |
| 18  | Na et al, 2011                       | *         | * | * | * | *             | -     | *        | * | * | 8                  |
| 19  | Sen et al, 2011                      | *         | * | * | * | *             | *     | *        | * | * | 9                  |
| 20  | Taalat et al, 2014                   | *         | * | * | * | *             | *     | *        | * | * | 9                  |
| 21  | Steinbrugger et al, 2009             | *         | * | * | * | *             | *     | *        | * | * | 9                  |
| 22  | Weger et al, 2004                    | *         | * | * | * | *             | *     | *        | * | * | 9                  |
| 23  | Kucherenko et al, 2013               | *         | * | * | * | *             | -     | *        | * | * | 8                  |

"-" means no star was assigned.

**B. IL-6 levels**

| No. | Study, year                  | Selection |   |   |   | Comparability |       | Exposure |   |   | Total no. of stars |
|-----|------------------------------|-----------|---|---|---|---------------|-------|----------|---|---|--------------------|
|     |                              | 1         | 2 | 3 | 4 | 1 (a)         | 1 (b) | 1 (a)    | 2 | 3 |                    |
| 1   | Borkenstein et al, 2013      | *         | * | * | * | *             | *     | *        | * | * | 9                  |
| 2   | Chua et al, 2012             | *         | * | * | * | *             | *     | *        | * | * | 9                  |
| 3   | Engel et al, 2014            | *         | * | * | * | *             | *     | *        | * | * | 9                  |
| 4   | Freedman and Iserovich, 2013 | *         | * | * | * | -             | *     | *        | * | * | 8                  |
| 5   | Ghanem et al, 2011           | *         | * | * | * | *             | *     | *        | * | * | 9                  |
| 6   | Inoue-Mochita et al, 2018    | *         | * | * | * | *             | -     | *        | * | * | 8                  |
| 7   | Khalef et al, 2017           | *         | * | * | * | *             | *     | *        | * | * | 9                  |
| 8   | Kutchev et al, 2010          | *         | * | * | * | *             | *     | *        | * | * | 9                  |
| 9   | Niu, 2018                    | *         | * | * | * | *             | *     | *        | * | * | 9                  |
| 10  | Ohira et al, 2015            | *         | * | * | * | *             | -     | *        | * | * | 8                  |
| 11  | Sorkhabi et al, 2010         | *         | * | * | * | *             | *     | *        | * | * | 9                  |
| 12  | Takai et al, 2012            | *         | * | * | * | *             | -     | *        | * | * | 8                  |
| 13  | Ten Berge et al, 2019        | *         | * | * | * | *             | -     | *        | * | * | 8                  |
| 14  | Zenkel et al, 2010           | *         | * | * | * | *             | *     | *        | * | * | 9                  |
| 15  | Du et al, 2016               | *         | * | - | - | *             | -     | *        | * | * | 6                  |
| 16  | Duvesh et al, 2017           | *         | * | * | * | *             | *     | *        | * | * | 9                  |
| 17  | Liu et al, 2017              | *         | * | * | * | *             | -     | *        | * | * | 8                  |
| 18  | Wang et al, 2018             | *         | * | * | * | *             | -     | *        | * | * | 8                  |
| 19  | Kovacs et al, 2015           | *         | * | * | * | *             | *     | *        | * | * | 9                  |
| 20  | Li et al, 2012               | *         | * | * | * | *             | -     | *        | * | * | 8                  |
| 21  | Liu et al, 2017              | *         | * | * | * | *             | *     | *        | * | * | 9                  |
| 22  | Rusnak et al, 2015           | *         | * | * | * | *             | -     | *        | * | * | 8                  |

| No. | Study, year                                   | Selection |   |   |   | Comparability |       | Exposure |   |   | Total no. of stars |
|-----|-----------------------------------------------|-----------|---|---|---|---------------|-------|----------|---|---|--------------------|
|     |                                               | 1         | 2 | 3 | 4 | 1 (a)         | 1 (b) | 1 (a)    | 2 | 3 |                    |
| 23  | Sarenac V. et al, 2015                        | *         | * | * | * | *             | -     | *        | * | * | 8                  |
| 24  | Garweg et al, 2017                            | *         | * | * | * | *             | -     | *        | * | * | 8                  |
| 25  | Aketa et al, 2017                             | *         | * | * | * | *             | *     | *        | * | * | 9                  |
| 26  | Zhang et al, 2018                             | *         | * | * | * | *             | -     | *        | * | * | 8                  |
| 27  | Banerjee et al, 200                           | *         | * | * | * | *             | -     | *        | * | * | 8                  |
| 28  | Hernández Garfella et al, 2015                | *         | * | * | * | *             | -     | *        | * | * | 8                  |
| 29  | Petrinović-Doresić, et al 1999                | *         | * | * | * | *             | -     | *        | * | * | 8                  |
| 30  | Sijssens et al, 20                            | *         | * | * | * | *             | *     | *        | * | * | 9                  |
| 31  | van Kooij et al, 2006                         | *         | * | * | * | *             | *     | *        | * | * | 9                  |
| 32  | Wakefield et al, 1995                         | *         | * | * | * | *             | -     | *        | * | * | 8                  |
| 33  | Ang et al, 201                                | *         | * | * | * | -             | -     | *        | * | * | 7                  |
| 34  | Curnow et al, 2005                            | *         | * | * | * | *             | -     | *        | * | * | 8                  |
| 35  | Murray et al, 1990                            | *         | * | * | * | *             | -     | *        | * | * | 8                  |
| 36  | Sauer et al, 2018                             | *         | * | * | * | *             | *     | *        | * | * | 9                  |
| 37  | Bae and Lee, 2012                             | *         | * | * | * | *             | -     | *        | * | * | 8                  |
| 38  | Chen et al, 2014                              | *         | * | * | * | *             | *     | *        | * | * | 9                  |
| 39  | Murugeswari et al, 2008                       | *         | * | * | * | *             | -     | *        | * | * | 8                  |
| 40  | Murugeswari et al, 2014                       | *         | * | * | * | *             | -     | *        | * | * | 8                  |
| 41  | Nagata et al, 2012                            | *         | * | * | * | *             | *     | *        | * | * | 9                  |
| 42  | Valentincic et al, 2011                       | *         | * | * | * | *             | *     | *        | * | * | 9                  |
| 43  | Aketa et al, 2017 (a)                         | *         | * | - | * | *             | *     | *        | * | * | 8                  |
| 44  | Nagarkatti-Gude et al, 2012                   | *         | * | * | * | *             | -     | *        | * | * | 8                  |
| 45  | Kuiper et al, 2011                            | *         | * | * | * | *             | -     | *        | * | * | 8                  |
| 46  | Perez et al, 2004                             | *         | * | * | * | *             | *     | *        | * | * | 9                  |
| 47  | Boss et al, 2017                              | *         | * | * | * | *             | *     | *        | * | * | 9                  |
| 48  | Chen et al, 2017                              | *         | * | * | * | *             | *     | *        | * | * | 9                  |
| 49  | Chernykh et al, 2015                          | *         | * | * | * | *             | *     | *        | * | * | 9                  |
| 50  | Cheung et al, 2012                            | *         | * | * | * | *             | *     | *        | * | * | 9                  |
| 51  | Dong et al, 2013                              | *         | * | * | * | *             | *     | *        | * | * | 9                  |
| 52  | Feng et al, 2018                              | *         | * | * | * | *             | *     | *        | * | * | 9                  |
| 53  | Funatsu et al, 2001                           | *         | * | * | * | *             | -     | *        | * | * | 8                  |
| 54  | Gustavsson et al, 2012                        | *         | * | * | * | *             | *     | *        | * | * | 9                  |
| 55  | Oh et al, 2010                                | *         | * | * | * | *             | -     | *        | * | * | 8                  |
| 56  | Sin et al, 2013                               | *         | * | * | * | *             | -     | *        | * | * | 8                  |
| 57  | Suzuki et al, 2011                            | *         | * | * | * | *             | -     | *        | * | * | 8                  |
| 58  | Yuuki et al, 2001                             | *         | * | * | * | *             | -     | *        | * | * | 8                  |
| 59  | Abu el Asrar et al, 1992                      | *         | * | * | * | *             | -     | *        | * | * | 8                  |
| 60  | Adamiec-Mroczek and Oficjalska-Młyńczak, 2008 | *         | * | * | * | *             | *     | *        | * | * | 9                  |
| 61  | Bromberg-White et al, 2013                    | *         | * | * | * | *             | -     | *        | * | * | 8                  |
| 62  | Canataroglu et al, 2005                       | *         | * | * | * | *             | -     | *        | * | * | 8                  |
| 63  | Kauffmann et al, 1994                         | *         | * | - | - | *             | -     | *        | * | * | 6                  |
| 64  | Koskela et al, 2013                           | *         | * | * | * | *             | *     | *        | * | * | 9                  |
| 65  | Loukovaara et al, 2017                        | *         | * | * | * | *             | -     | *        | * | * | 8                  |
| 66  | Mocan et al, 2006                             | *         | * | * | * | *             | *     | *        | * | * | 9                  |
| 67  | Nakamura et al, 2003                          | *         | * | * | * | *             | *     | *        | * | * | 9                  |
| 68  | Schoenberger et al, 2012                      | *         | * | * | * | *             | -     | *        | * | * | 8                  |
| 69  | Shimura et al, 2009                           | *         | * | - | - | *             | -     | *        | * | * | 6                  |
| 70  | Song et al, 2014                              | *         | * | * | * | *             | *     | *        | * | * | 9                  |
| 71  | Srividya et al, 2018                          | *         | * | * | * | *             | -     | *        | * | * | 8                  |
| 72  | Takahashi et al, 2016                         | *         | * | * | * | *             | -     | *        | * | * | 8                  |
| 73  | Tsai et al, 2018                              | *         | * | * | * | *             | *     | *        | * | * | 9                  |

| No. | Study, year                | Selection |   |   |   | Comparability |       | Exposure |   |   | Total no. of stars |
|-----|----------------------------|-----------|---|---|---|---------------|-------|----------|---|---|--------------------|
|     |                            | 1         | 2 | 3 | 4 | 1 (a)         | 1 (b) | 1 (a)    | 2 | 3 |                    |
| 74  | Wu et al, 2017             | *         | * | * | * | *             | -     | *        | * | * | 8                  |
| 75  | Xu et al, 2015             | *         | * | * | * | *             | *     | *        | * | * | 9                  |
| 76  | Yoshida et al, 2015        | *         | * | * | * | *             | -     | *        | * | * | 8                  |
| 77  | Yoshimura et al, 2009      | *         | * | * | * | *             | -     | *        | * | * | 8                  |
| 78  | Zeng et al, 2019           | *         | * | * | * | *             | *     | *        | * | * | 9                  |
| 79  | Zhou et al, 2012           | *         | * | * | * | *             | *     | *        | * | * | 9                  |
| 80  | Mastropasqua et al, 2018   | *         | * | * | * | *             | -     | *        | * | * | 8                  |
| 81  | Bandyopadhyay et al, 2018  | *         | * | * | * | *             | *     | *        | * | * | 9                  |
| 82  | Bayomy and Elgouhary, 2018 | *         | * | * | * | *             | *     | *        | * | * | 9                  |
| 83  | Chen et al, 2016           | *         | * | * | * | *             | *     | *        | * | * | 9                  |
| 84  | Dong et al, 2015           | *         | * | * | * | *             | *     | *        | * | * | 9                  |
| 85  | Funatsu et al, 2002        | *         | * | * | * | *             | -     | *        | * | * | 8                  |
| 86  | Funatsu et al, 2003        | *         | * | * | * | *             | *     | *        | * | * | 9                  |
| 87  | Funatsu et al, 2009        | *         | * | * | * | *             | *     | *        | * | * | 9                  |
| 88  | Funk et al, 2010           | *         | * | * | * | *             | *     | *        | * | * | 9                  |
| 89  | Jonas et al, 2012          | *         | * | * | * | *             | *     | *        | * | * | 9                  |
| 90  | Kim et al, 2014            | *         | * | * | * | *             | *     | *        | * | * | 9                  |
| 91  | Kim et al, 2015            | *         | * | * | * | *             | *     | *        | * | * | 9                  |
| 92  | Lee et al, 2012            | *         | * | * | * | *             | -     | *        | * | * | 8                  |
| 93  | Noma et al, 2017           | *         | * | * | * | *             | *     | *        | * | * | 9                  |
| 94  | Roh et al, 2009            | *         | * | * | * | *             | -     | *        | * | * | 8                  |
| 95  | Sohn et al, 2011           | *         | * | * | * | *             | *     | *        | * | * | 9                  |
| 96  | Sonoda et al, 2013         | *         | * | * | * | *             | -     | *        | * | * | 8                  |
| 97  | Wen et al, 2015            | *         | * | * | * | *             | *     | *        | * | * | 9                  |
| 99  | Yu et al, 2018             | *         | * | * | * | *             | *     | *        | * | * | 9                  |
| 100 | Chu et al, 2013            | *         | * | * | * | *             | *     | *        | * | * | 9                  |
| 101 | Feng et al, 2013           | *         | * | * | * | *             | -     | *        | * | * | 8                  |
| 102 | Jung et al, 2014           | *         | * | * | * | *             | *     | *        | * | * | 9                  |
| 103 | Chen et al, 1999           | *         | * | * | * | *             | *     | *        | * | * | 9                  |
| 104 | Ehiken et al, 2015         | *         | * | * | * | *             | *     | *        | * | * | 9                  |
| 105 | Funk et al, 2009           | *         | * | * | * | *             | *     | *        | * | * | 9                  |
| 106 | Koss et al, 2012           | *         | * | * | * | *             | *     | *        | * | * | 9                  |
| 107 | Koss et al, 2013           | *         | * | * | * | *             | *     | *        | * | * | 9                  |
| 108 | Noma et al, 2009           | *         | * | * | * | *             | *     | *        | * | * | 9                  |
| 109 | Noma et al, 2010           | *         | * | * | * | *             | *     | *        | * | * | 9                  |
| 110 | Noma et al, 2012           | *         | * | * | * | *             | *     | *        | * | * | 9                  |
| 111 | Noma et al, 2013           | *         | * | * | * | *             | *     | *        | * | * | 9                  |
| 112 | Noma et al, 2015           | *         | * | * | * | *             | *     | *        | * | * | 9                  |
| 113 | Rezar-Dreindl et al, 2016  | *         | * | * | * | *             | *     | *        | * | * | 9                  |
| 114 | Shchuko et al, 2015        | *         | * | * | * | *             | *     | *        | * | * | 9                  |
| 115 | Kaneda et al, 2011         | *         | * | * | * | *             | *     | *        | * | * | 9                  |
| 116 | Lim, 2011                  | *         | * | * | * | *             | *     | *        | * | * | 9                  |
| 117 | Noma et al, 2005           | *         | * | * | * | *             | *     | *        | * | * | 9                  |
| 118 | Noma et al, 2006           | *         | * | * | * | *             | *     | *        | * | * | 9                  |
| 119 | Noma et al, 2013 (a)       | *         | * | * | * | *             | *     | *        | * | * | 9                  |
| 120 | Noma et al, 2014           | *         | * | * | * | *             | *     | *        | * | * | 9                  |
| 121 | Noma et al, 2014 (a)       | *         | * | * | * | *             | *     | *        | * | * | 9                  |
| 122 | Noma et al, 2016           | *         | * | * | * | *             | *     | *        | * | * | 9                  |
| 123 | Park and Ahn, 2009         | *         | * | * | * | *             | *     | *        | * | * | 9                  |
| 124 | Pfister et al, 2013        | *         | * | * | * | *             | *     | *        | * | * | 9                  |
| 125 | Shimura et al, 2008        | *         | * | * | * | *             | *     | *        | * | * | 9                  |
| 126 | Sohn et al, 2014           | *         | * | * | * | *             | *     | *        | * | * | 9                  |
| 127 | Kramer et al, 2005         | *         | * | * | * | *             | *     | *        | * | * | 9                  |
| 128 | Agawa et al, 2014          | *         | * | * | * | *             | *     | *        | * | * | 9                  |
| 129 | Chalam et al, 2014         | *         | * | * | * | *             | *     | *        | * | * | 9                  |

| No. | Study, year                 | Selection |   |   |   | Comparability |       | Exposure |   |   | Total no. of stars |
|-----|-----------------------------|-----------|---|---|---|---------------|-------|----------|---|---|--------------------|
|     |                             | 1         | 2 | 3 | 4 | 1 (a)         | 1 (b) | 1 (a)    | 2 | 3 |                    |
| 130 | Feng et al, 2018 (a)        | *         | * | * | * | *             | *     | *        | * | * | 9                  |
| 131 | Mimura et al, 2019          | *         | * | * | * | *             | *     | *        | * | * | 9                  |
| 132 | Motohashi et al, 2017       | *         | * | * | * | *             | *     | *        | * | * | 9                  |
| 133 | Ten Berge et al, 2019       | *         | * | * | * | *             | *     | *        | * | * | 9                  |
| 134 | Spindler et al, 2018        | *         | * | * | * | *             | *     | *        | * | * | 9                  |
| 135 | Fausser et al, 2015         | *         | * | * | * | *             | *     | *        | * | * | 9                  |
| 136 | Jonas et al, 2012           | *         | * | * | * | *             | *     | *        | * | * | 9                  |
| 137 | Miao et al, 2012            | *         | * | * | * | *             | -     | *        | * | * | 8                  |
| 138 | Sakurada et al, 2015        | *         | * | * | * | *             | *     | *        | * | * | 9                  |
| 139 | Sato et al, 2018            | *         | * | * | * | *             | *     | *        | * | * | 9                  |
| 140 | Terao et al, 2018           | *         | * | * | * | *             | *     | *        | * | * | 9                  |
| 141 | Fan et al, 2018             | *         | * | * | * | *             | -     | *        | * | * | 8                  |
| 142 | Roh et al, 2010             | *         | * | * | * | *             | *     | *        | * | * | 9                  |
| 143 | Jung et al, 2014            | *         | * | * | * | *             | *     | *        | * | * | 9                  |
| 144 | Shin and Lim, 2011          | *         | * | * | * | *             | *     | *        | * | * | 9                  |
| 145 | Hu et al, 2016              | *         | * | * | * | *             | *     | *        | * | * | 9                  |
| 146 | Asensio-Sánchez et al, 2015 | *         | * | * | * | *             | *     | *        | * | * | 9                  |
| 147 | Garweg et al, 2019          | *         | * | * | * | *             | *     | *        | * | * | 9                  |
| 148 | Kunikata et al, 2013        | *         | * | * | * | *             | -     | *        | * | * | 8                  |
| 149 | Yamamoto et al, 2003        | *         | * | * | * | *             | -     | *        | * | * | 8                  |
| 150 | Sato et al, 2009            | *         | * | * | * | *             | *     | *        | * | * | 9                  |
| 151 | Feng et al, 2017            | *         | * | * | * | *             | -     | *        | * | * | 8                  |
| 152 | Zandi et al, 2016           | *         | * | * | * | *             | *     | *        | * | * | 9                  |
| 154 | Jakobsson et al, 2015       | *         | * | * | * | *             | *     | *        | * | * | 9                  |
| 155 | Sauer et al., 2016          | *         | * | * | * | *             | -     | *        | * | * | 8                  |
| 156 | Suzuki et al, 2019          | *         | * | * | * | *             | *     | *        | * | * | 9                  |
| 157 | Zhu et al, 2016             | *         | * | * | * | *             | *     | *        | * | * | 9                  |
| 158 | Dong et al, 2015 (a)        | *         | * | * | * | *             | *     | *        | * | * | 9                  |
| 159 | Kramer et al, 2012          | *         | * | * | * | *             | *     | *        | * | * | 9                  |

"-" means no star was assigned

**Supplemental Table S10.** Checklist of items included in our systematic review according to the Preferred Reporting Items for Systematic Reviews and Meta-Analyses (PRISMA) statement recommendations<sup>4</sup>

| Section/topic                      | #  | Checklist item                                                                                                                                                                                                                                                                                              | Reported on page #                            |
|------------------------------------|----|-------------------------------------------------------------------------------------------------------------------------------------------------------------------------------------------------------------------------------------------------------------------------------------------------------------|-----------------------------------------------|
| <b>TITLE</b>                       |    |                                                                                                                                                                                                                                                                                                             |                                               |
| Title                              | 1  | Identify the report as a systematic review, meta-analysis, or both.                                                                                                                                                                                                                                         | 1                                             |
| <b>ABSTRACT</b>                    |    |                                                                                                                                                                                                                                                                                                             |                                               |
| Structured summary                 | 2  | Provide a structured summary including, as applicable: background; objectives; data sources; study eligibility criteria, participants, and interventions; study appraisal and synthesis methods; results; limitations; conclusions and implications of key findings; systematic review registration number. | 2                                             |
| <b>INTRODUCTION</b>                |    |                                                                                                                                                                                                                                                                                                             |                                               |
| Rationale                          | 3  | Describe the rationale for the review in the context of what is already known.                                                                                                                                                                                                                              | 2-4                                           |
| Objectives                         | 4  | Provide an explicit statement of questions being addressed with reference to participants, interventions, comparisons, outcomes, and study design (PICOS).                                                                                                                                                  | 2-4                                           |
| <b>METHODS</b>                     |    |                                                                                                                                                                                                                                                                                                             |                                               |
| Protocol and registration          | 5  | Indicate if a review protocol exists, if and where it can be accessed (e.g., Web address), and, if available, provide registration information including registration number.                                                                                                                               | -                                             |
| Eligibility criteria               | 6  | Specify study characteristics (e.g., PICOS, length of follow-up) and report characteristics (e.g., years considered, language, publication status) used as criteria for eligibility, giving rationale.                                                                                                      | 16-17                                         |
| Information sources                | 7  | Describe all information sources (e.g., databases with dates of coverage, contact with study authors to identify additional studies) in the search and date last searched.                                                                                                                                  | 16-17                                         |
| Search                             | 8  | Present full electronic search strategy for at least one database, including any limits used, such that it could be repeated.                                                                                                                                                                               | Appendix 1<br>(Search strategy)<br>Suppl. p34 |
| Study selection                    | 9  | State the process for selecting studies (i.e., screening, eligibility, included in systematic review, and, if applicable, included in the meta-analysis).                                                                                                                                                   | 16-17                                         |
| Data collection process            | 10 | Describe method of data extraction from reports (e.g., piloted forms, independently, in duplicate) and any processes for obtaining and confirming data from investigators.                                                                                                                                  | 17                                            |
| Data items                         | 11 | List and define all variables for which data were sought (e.g., PICOS, funding sources) and any assumptions and simplifications made.                                                                                                                                                                       | 17                                            |
| Risk of bias in individual studies | 12 | Describe methods used for assessing risk of bias of individual studies (including specification of whether this was done at the study or outcome level), and how this information is to be used in any data synthesis.                                                                                      | 17-18                                         |

| <b>Section/topic</b>          | <b>#</b> | <b>Checklist item</b>                                                                                                                                                                                    | <b>Reported on page #</b>               |
|-------------------------------|----------|----------------------------------------------------------------------------------------------------------------------------------------------------------------------------------------------------------|-----------------------------------------|
| Summary measures              | 13       | State the principal summary measures (e.g., risk ratio, difference in means).                                                                                                                            | 17-18                                   |
| Synthesis of results          | 14       | Describe the methods of handling data and combining results of studies, if done, including measures of consistency (e.g., $I^2$ ) for each meta-analysis.                                                | 17-18                                   |
| Risk of bias across studies   | 15       | Specify any assessment of risk of bias that may affect the cumulative evidence (e.g., publication bias, selective reporting within studies).                                                             | 17-18                                   |
| Additional analyses           | 16       | Describe methods of additional analyses (e.g., sensitivity or subgroup analyses, meta-regression), if done, indicating which were pre-specified.                                                         | 17-18                                   |
| <b>RESULTS</b>                |          |                                                                                                                                                                                                          |                                         |
| Study selection               | 17       | Give numbers of studies screened, assessed for eligibility, and included in the review, with reasons for exclusions at each stage, ideally with a flow diagram.                                          | 4, 5, Fig. 1A, Fig. 1B                  |
| Study characteristics         | 18       | For each study, present characteristics for which data were extracted (e.g., study size, PICOS, follow-up period) and provide the citations.                                                             | Suppl. Table 1 and 3                    |
| Risk of bias within studies   | 19       | Present data on risk of bias of each study and, if available, any outcome level assessment (see item 12).                                                                                                | Suppl. Table 9                          |
| Results of individual studies | 20       | For all outcomes considered (benefits or harms), present, for each study: (a) simple summary data for each intervention group (b) effect estimates and confidence intervals, ideally with a forest plot. | Suppl. Table 2 and 4. Fig. 1C,D, 2-7.   |
| Synthesis of results          | 21       | Present results of each meta-analysis done, including confidence intervals and measures of consistency.                                                                                                  | Suppl. Table 2 and 4. Fig. 1C,D, 2-7.   |
| Risk of bias across studies   | 22       | Present results of any assessment of risk of bias across studies (see Item 15).                                                                                                                          | Suppl. Table 2 and 4                    |
| Additional analysis           | 23       | Give results of additional analyses, if done (e.g., sensitivity or subgroup analyses, meta-regression [see Item 16]).                                                                                    | Suppl. Table 2, 4-6, Suppl. Fig. 2-4, 8 |
| <b>DISCUSSION</b>             |          |                                                                                                                                                                                                          |                                         |
| Summary of evidence           | 24       | Summarize the main findings including the strength of evidence for each main outcome; consider their relevance to key groups (e.g., healthcare providers, users, and policy makers).                     | 11-15                                   |
| Limitations                   | 25       | Discuss limitations at study and outcome level (e.g., risk of bias), and at review-level (e.g., incomplete retrieval of identified research, reporting bias).                                            | 15                                      |
| Conclusions                   | 26       | Provide a general interpretation of the results in the context of other evidence, and implications for future research.                                                                                  | 16                                      |



| Section/topic  | #  | Checklist item                                                                                                                             | Reported on page # |
|----------------|----|--------------------------------------------------------------------------------------------------------------------------------------------|--------------------|
| <b>FUNDING</b> |    |                                                                                                                                            |                    |
| Funding        | 27 | Describe sources of funding for the systematic review and other support (e.g., supply of data); role of funders for the systematic review. | -                  |

**References:**

- [1]. Hozo, S.P., Djulbegovic, B., & Hozo, I. Estimating the mean and variance from the median, range, and the size of a sample. *BMC Med Res Methodol* **5**, 13 (2005).
- [2]. Wan, X., Wang, W., Liu, J., & Tong, T. Estimating the sample mean and standard deviation from the sample size, median, range and/or interquartile range. *BMC Med Res Methodol* **14**, 135 (2014).
- [3]. Wells, G.A., Shea, B., O'Connell, D., Peterson, J., Welch, V., Losos, M., *et al.* The Newcastle-Ottawa Scale (NOS) for assessing the quality of nonrandomized studies in meta-analysis. [http://www.ohri.ca/programs/clinical\\_epidemiology/oxford.asp](http://www.ohri.ca/programs/clinical_epidemiology/oxford.asp) (2011).
- [4]. Moher, D., Liberati, A., Tetzlaff, J., & Altman, D.G., PRISMA Group. Preferred reporting items for systematic reviews and meta-analyses: the PRISMA statement. *PLoS Med* **6**, e1000097 (2009).

## Appendix 1

### Search Strategy

We ran the following search strategy in PubMed until October 2019:

1. “Interleukin-6” [MeSH Terms] OR “Interleukin-6” [All Fields] OR “Interleukin-6” [Title/Abstract]
2. “Polymorphism” [MeSH Terms] OR “Polymorphism” [All Fields] OR “Polymorphism” [Title/Abstract]
3. “Eye disease” [All Fields] OR “Ocular disease” [All Fields] OR “Ophthalmology” [All Fields]
4. “Aqueous” [All Fields] OR “Aqueous” [Title/Abstract]
5. “Vitreous” [All Fields] OR “Vitreous” [Title/Abstract]
6. 1 AND 2 AND 3
7. 1 AND 3
8. 1 AND 4
9. 1 AND 5
10. 1 AND 3 AND 4
11. 1 AND 3 AND 5

## Supplemental Figures

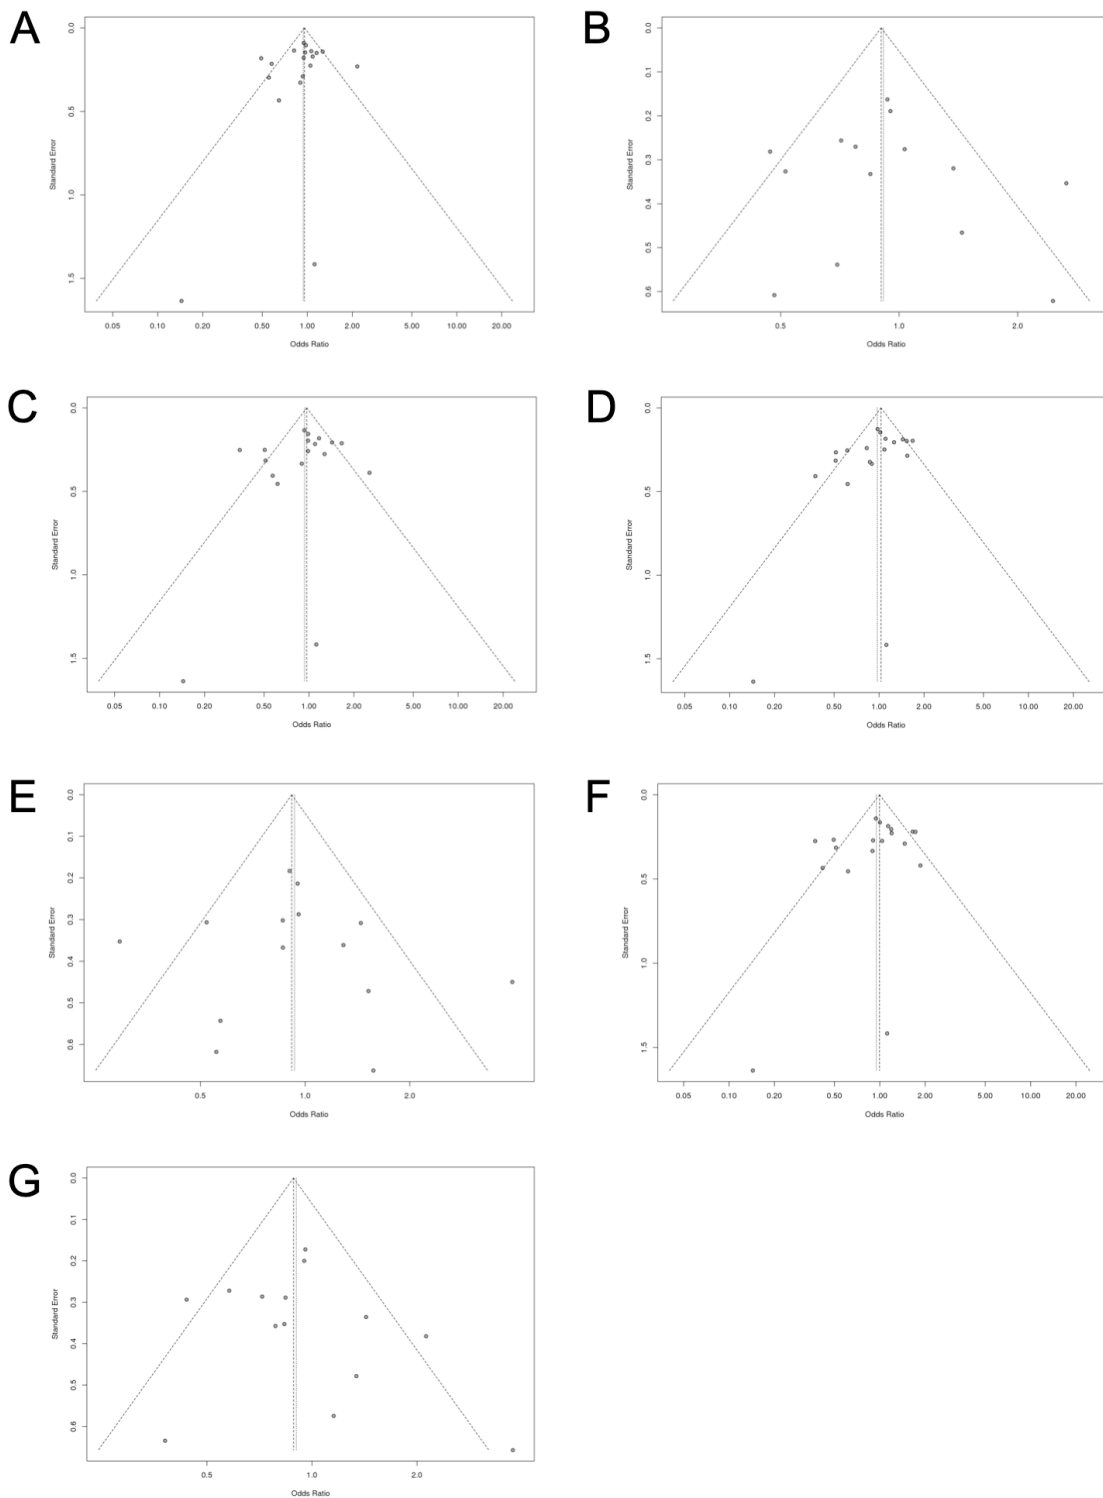

**Supplemental Figure S1.** A funnel plot analysis of publication bias for IL-6-174 G/C polymorphism and ocular disease. **(A)** Allele model (C vs. G); **(B)** Recessive model (CC vs. GC+GG); **(C)** Dominant model (CC+GC vs. GG); **(D)** Overdominant model (GC vs. CC+GG); **(E)** Homozygous model (CC vs. GG); **(F)** Heterozygous model (GC vs. GG); **(G)** GC vs. CC model.

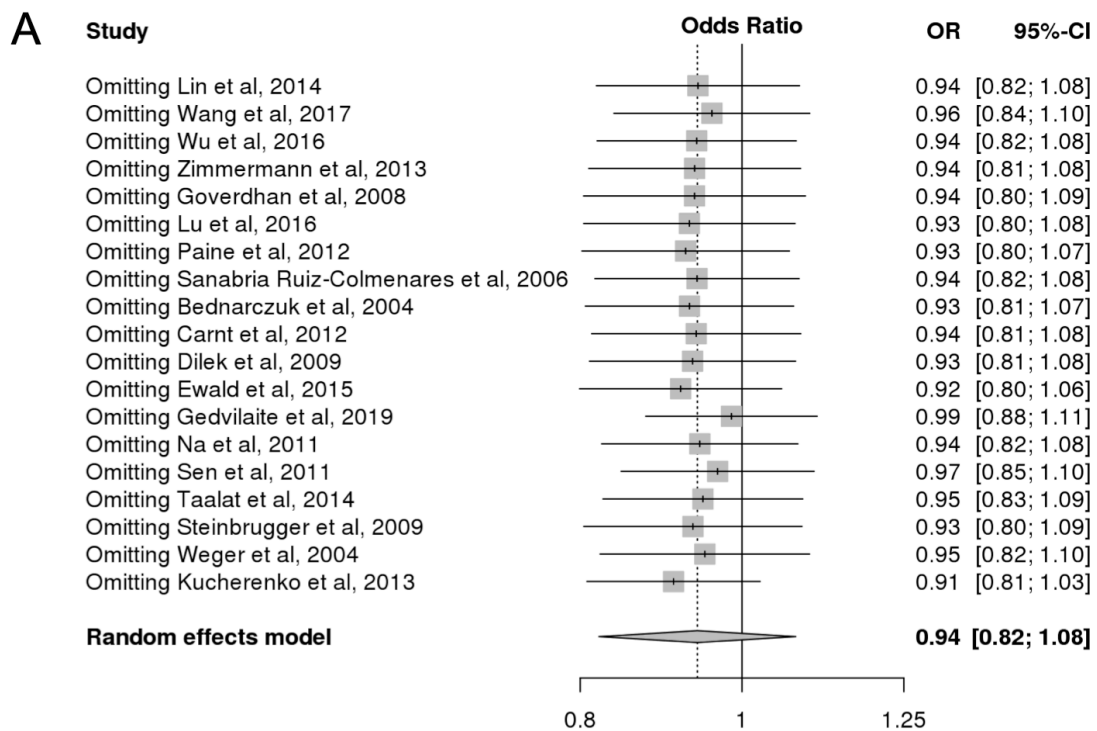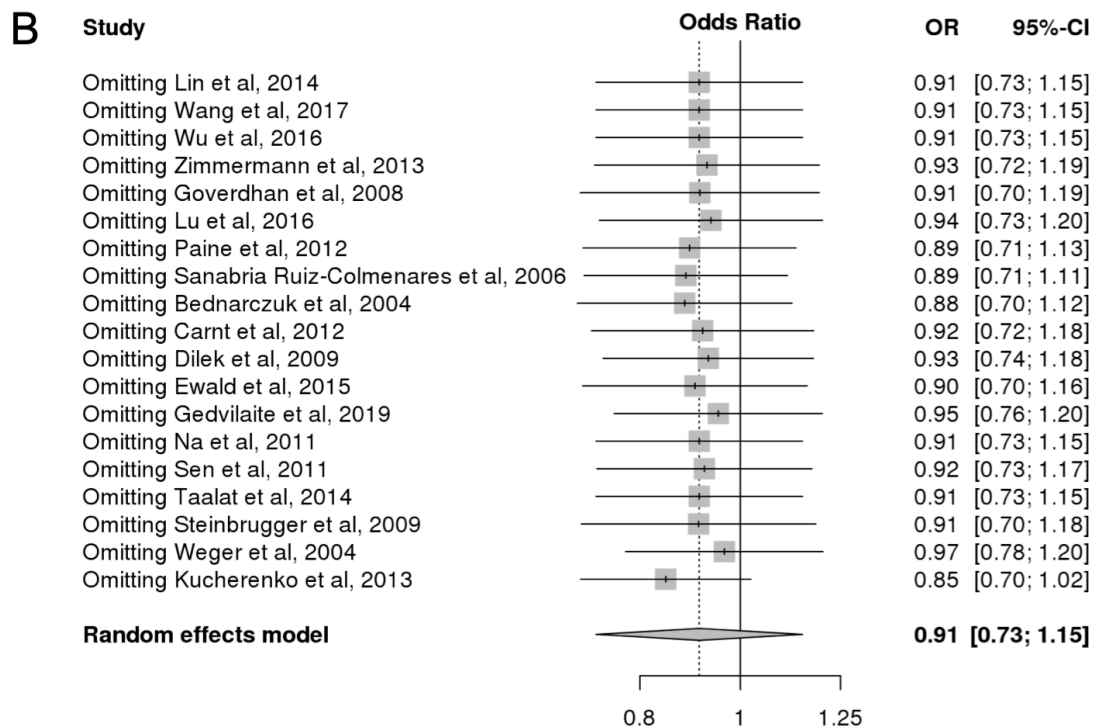

**Supplemental Figure S2.** A sensitivity analysis for IL-6-174 G/C polymorphism and ocular disease. **(A)** Allele model (C vs. G); **(B)** Recessive model (CC vs. GC+GG).

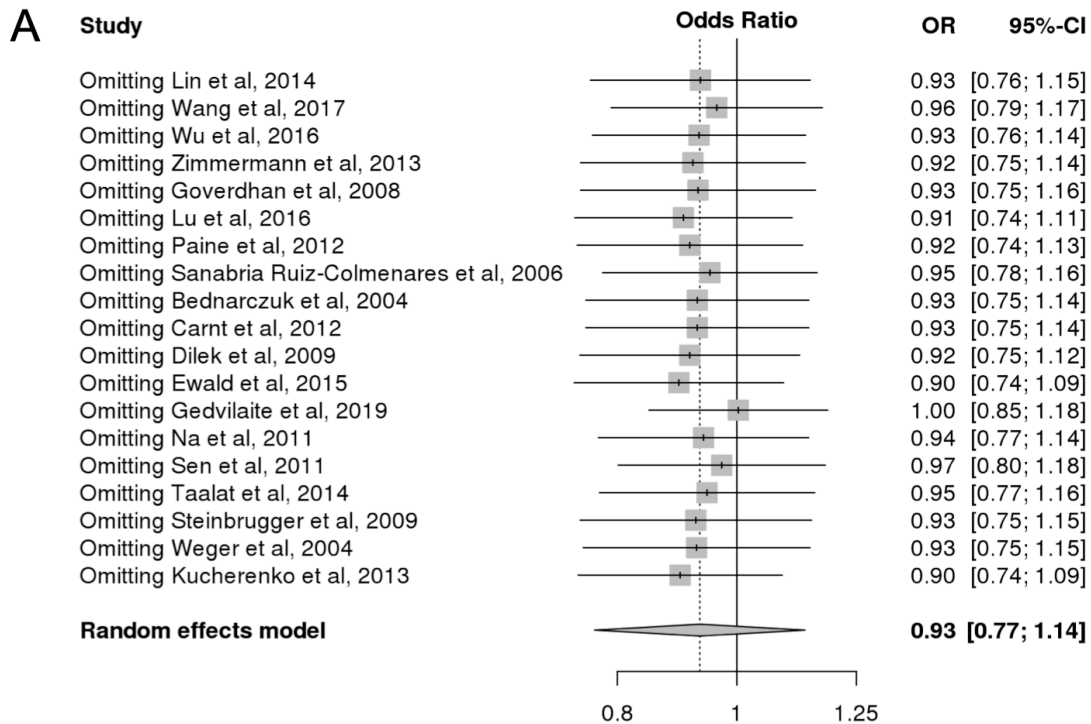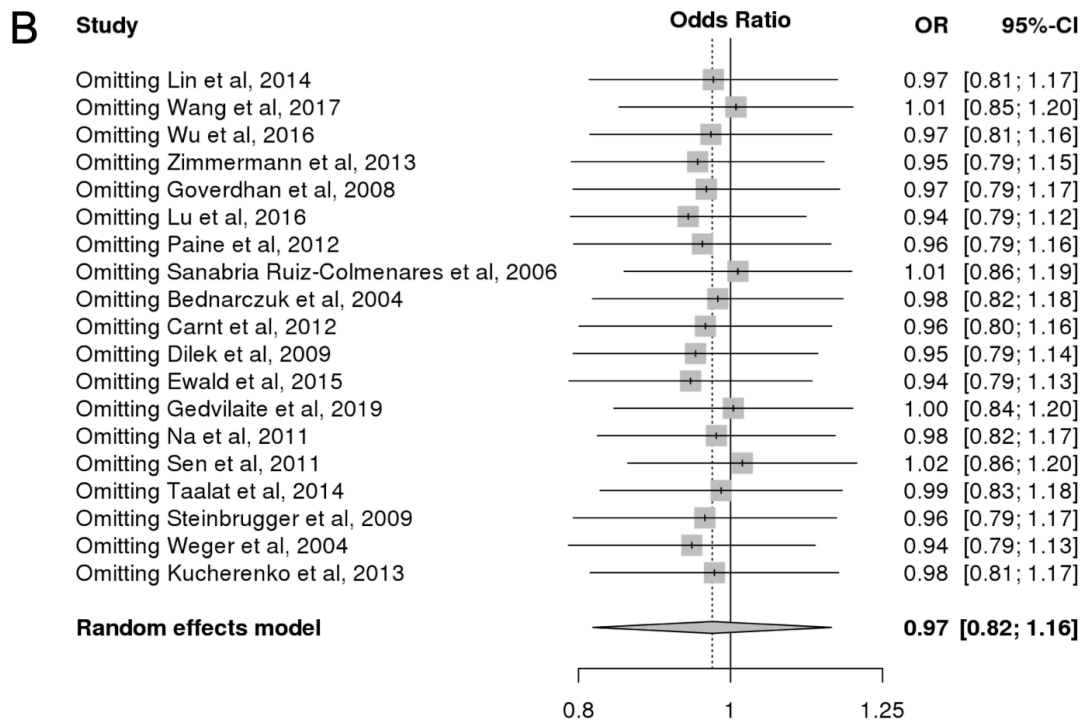

**Supplemental Figure S3.** A sensitivity analysis for IL-6-174 G/C polymorphism and ocular disease. **(A)** Dominant model (CC+GC vs. GG); **(B)** Overdominant model (GC vs. CC+GG).

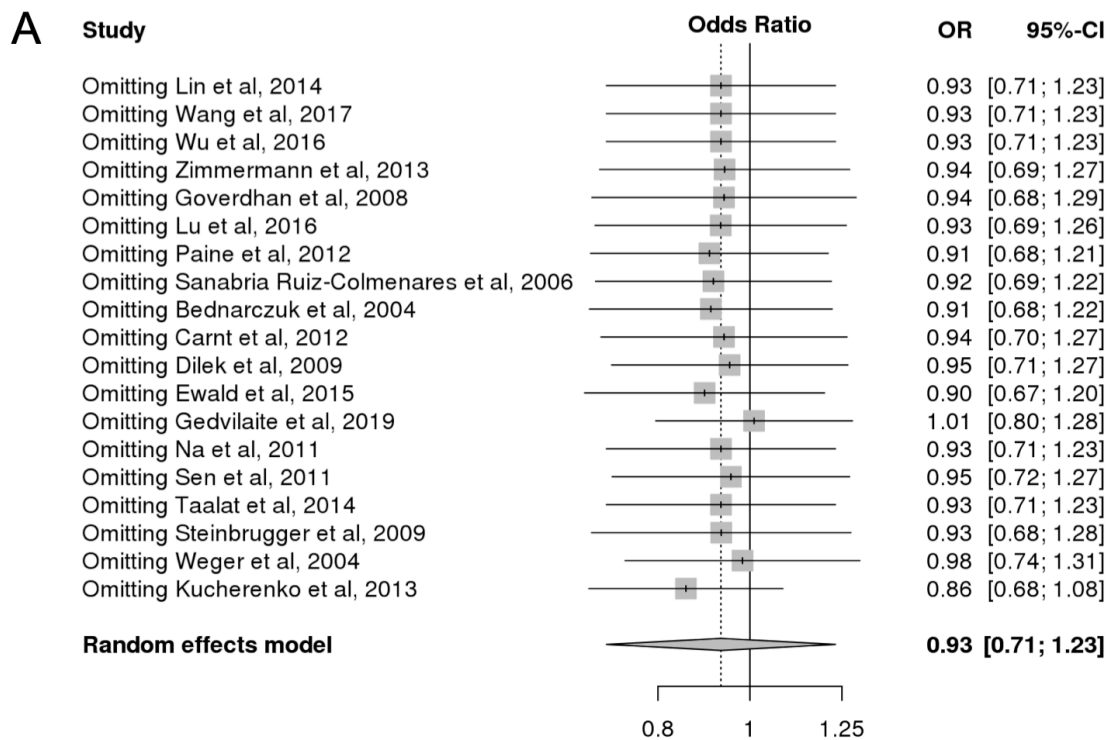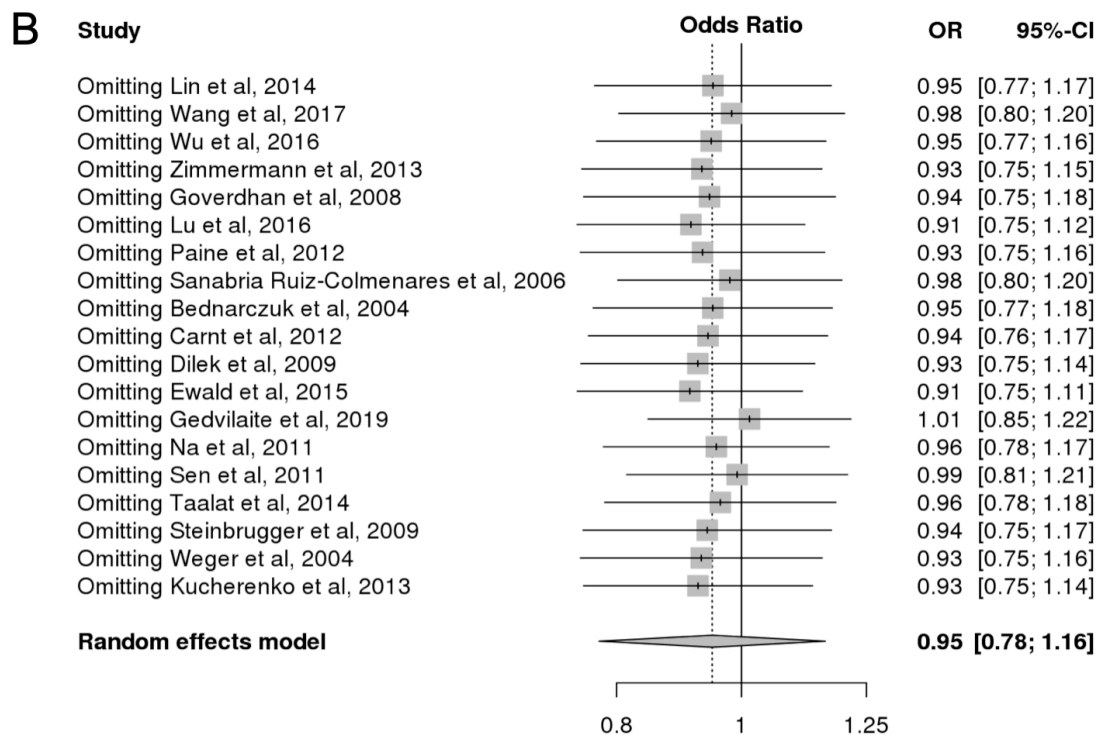

**Supplemental Figure S4.** A sensitivity analysis for IL-6-174 G/C polymorphism and ocular disease. **(A)** Homozygous model (CC vs. GG); **(B)** Heterozygous model (GC vs. GG).

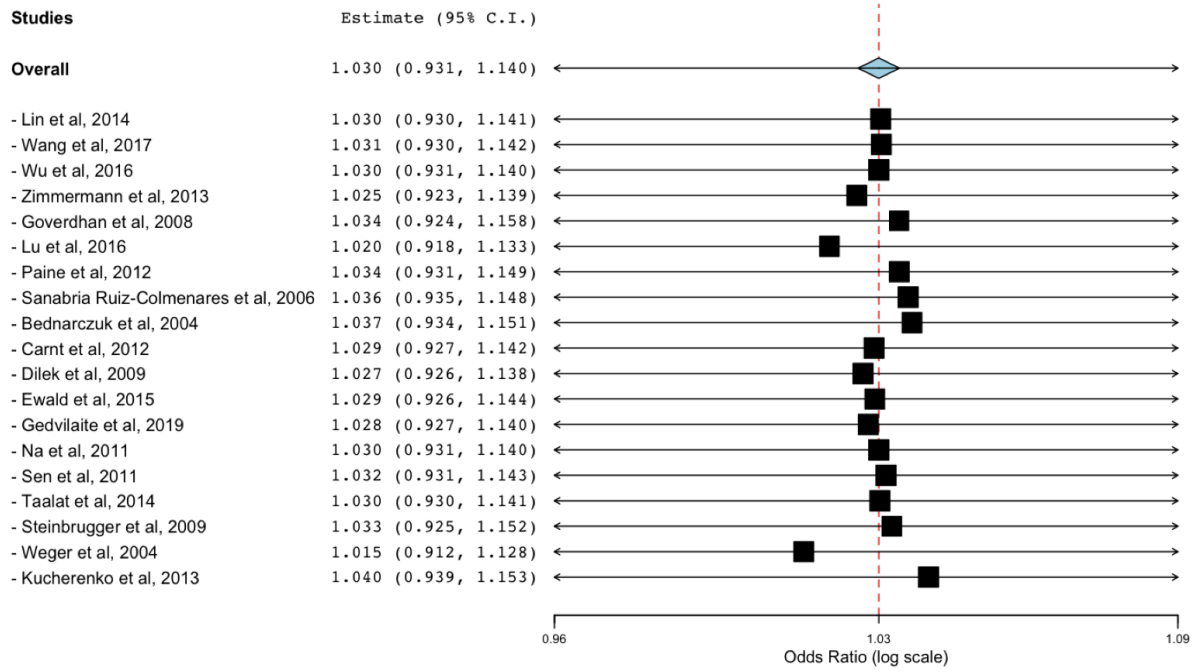

**Supplemental Figure S5.** A sensitivity analysis of IL-6-174 G/C polymorphism and ocular disease for GC vs. CC model.

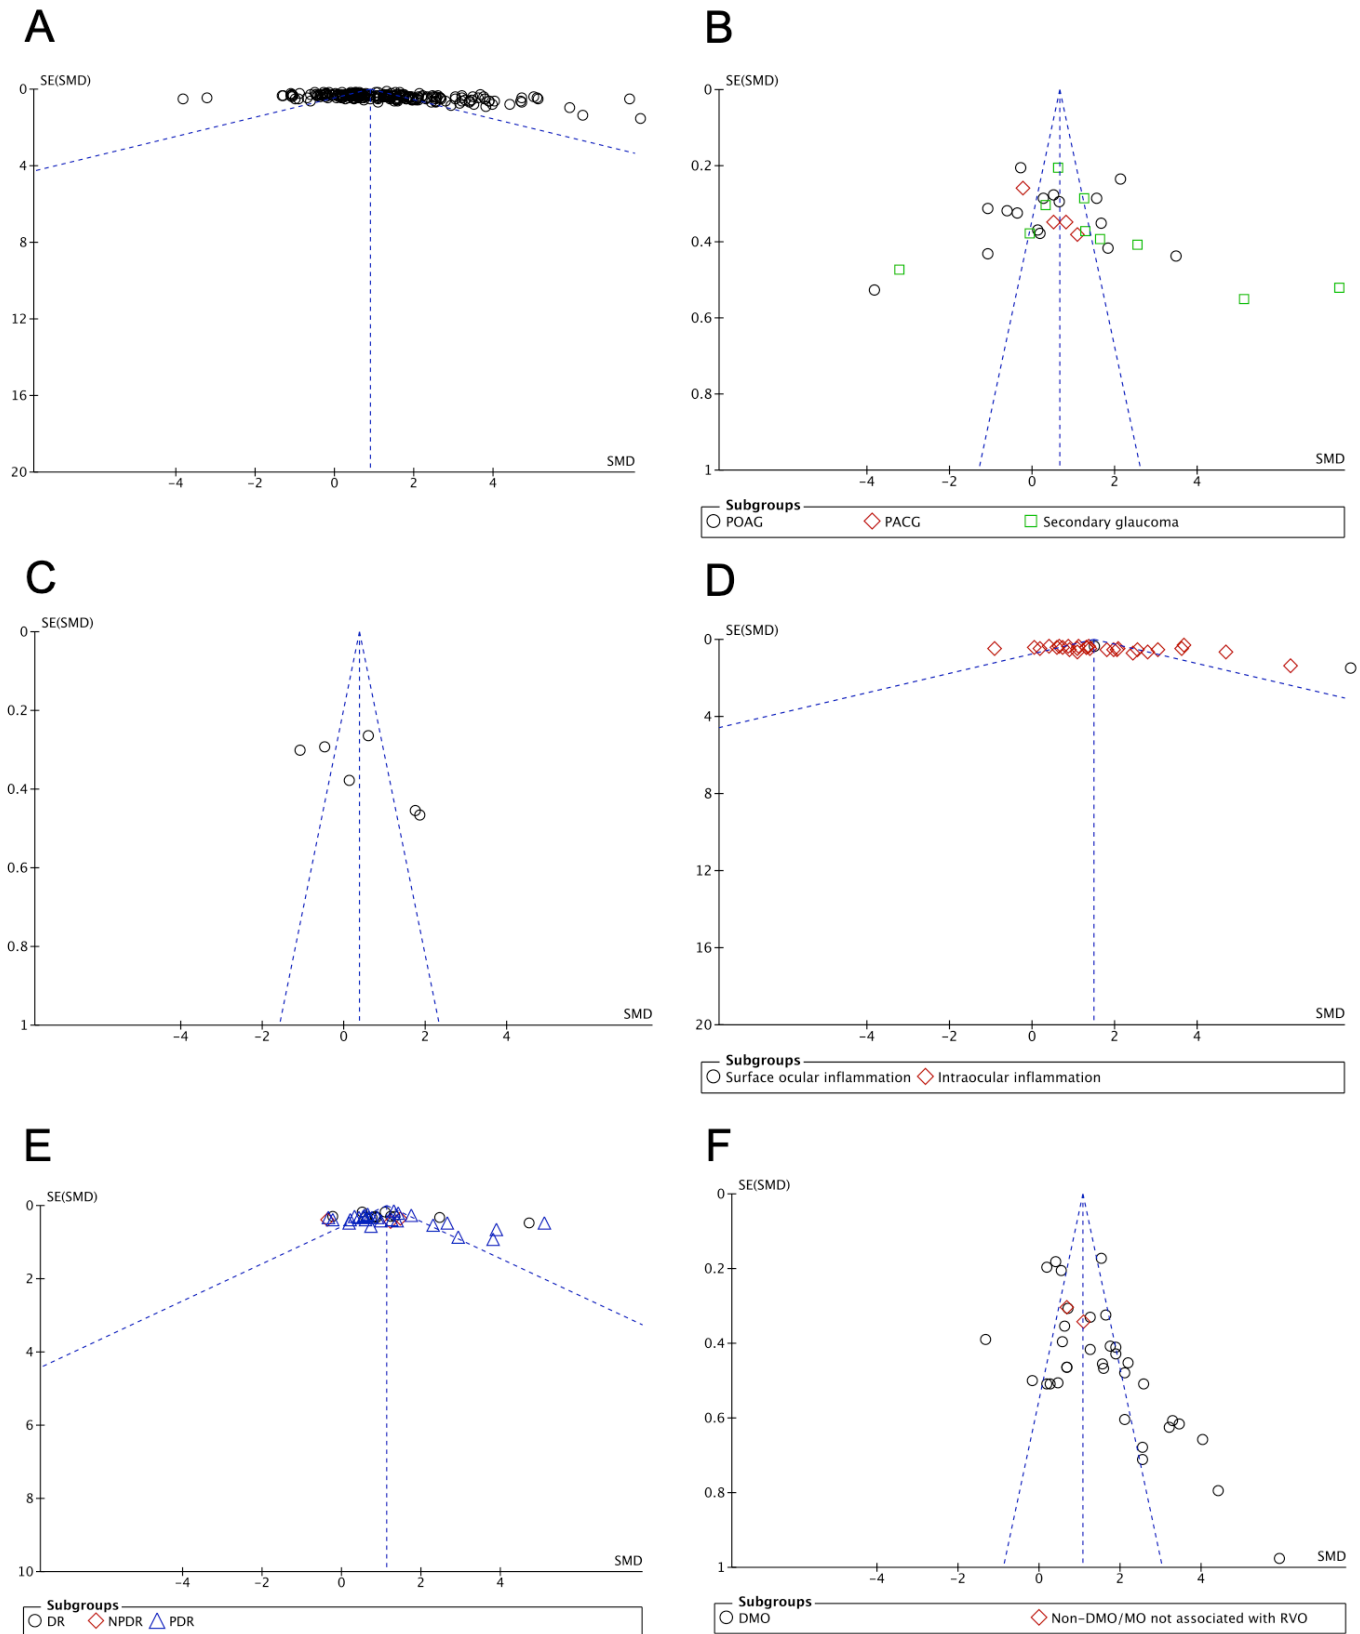

**Supplemental Figure S6.** A funnel plot analysis of publication bias for intraocular IL-6 levels and ocular diseases. (A) Overall; (B) Glaucoma; (C) PEX syndrome; (D) Ocular inflammation; (E) DR; (F) MO.



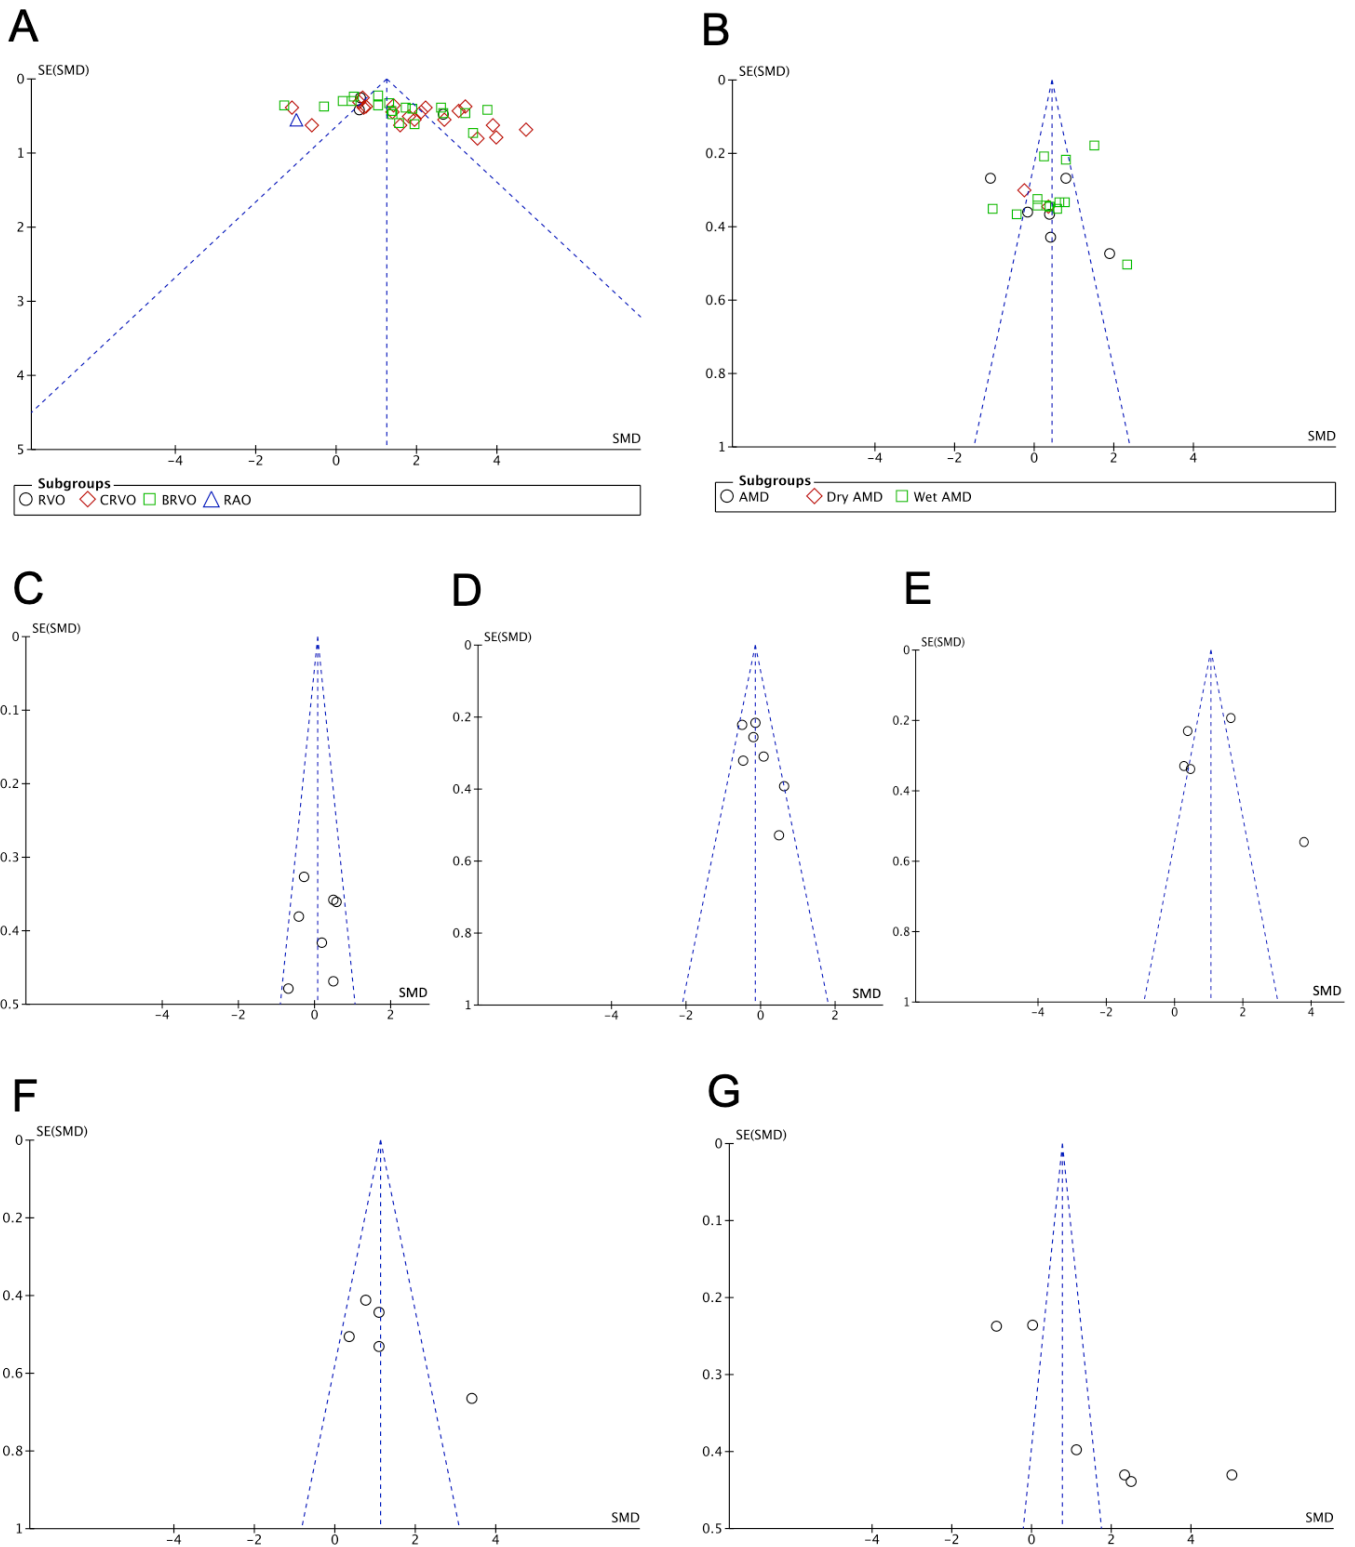

**Supplemental Figure S7.** A funnel plot analysis of publication bias for intraocular IL-6 levels and ocular diseases. (A) Retinal vascular occlusion; (B) AMD; (C) CNV; (D) Pachychoroid spectrum diseases; (E) RD; (F) PVR; (G) Others.

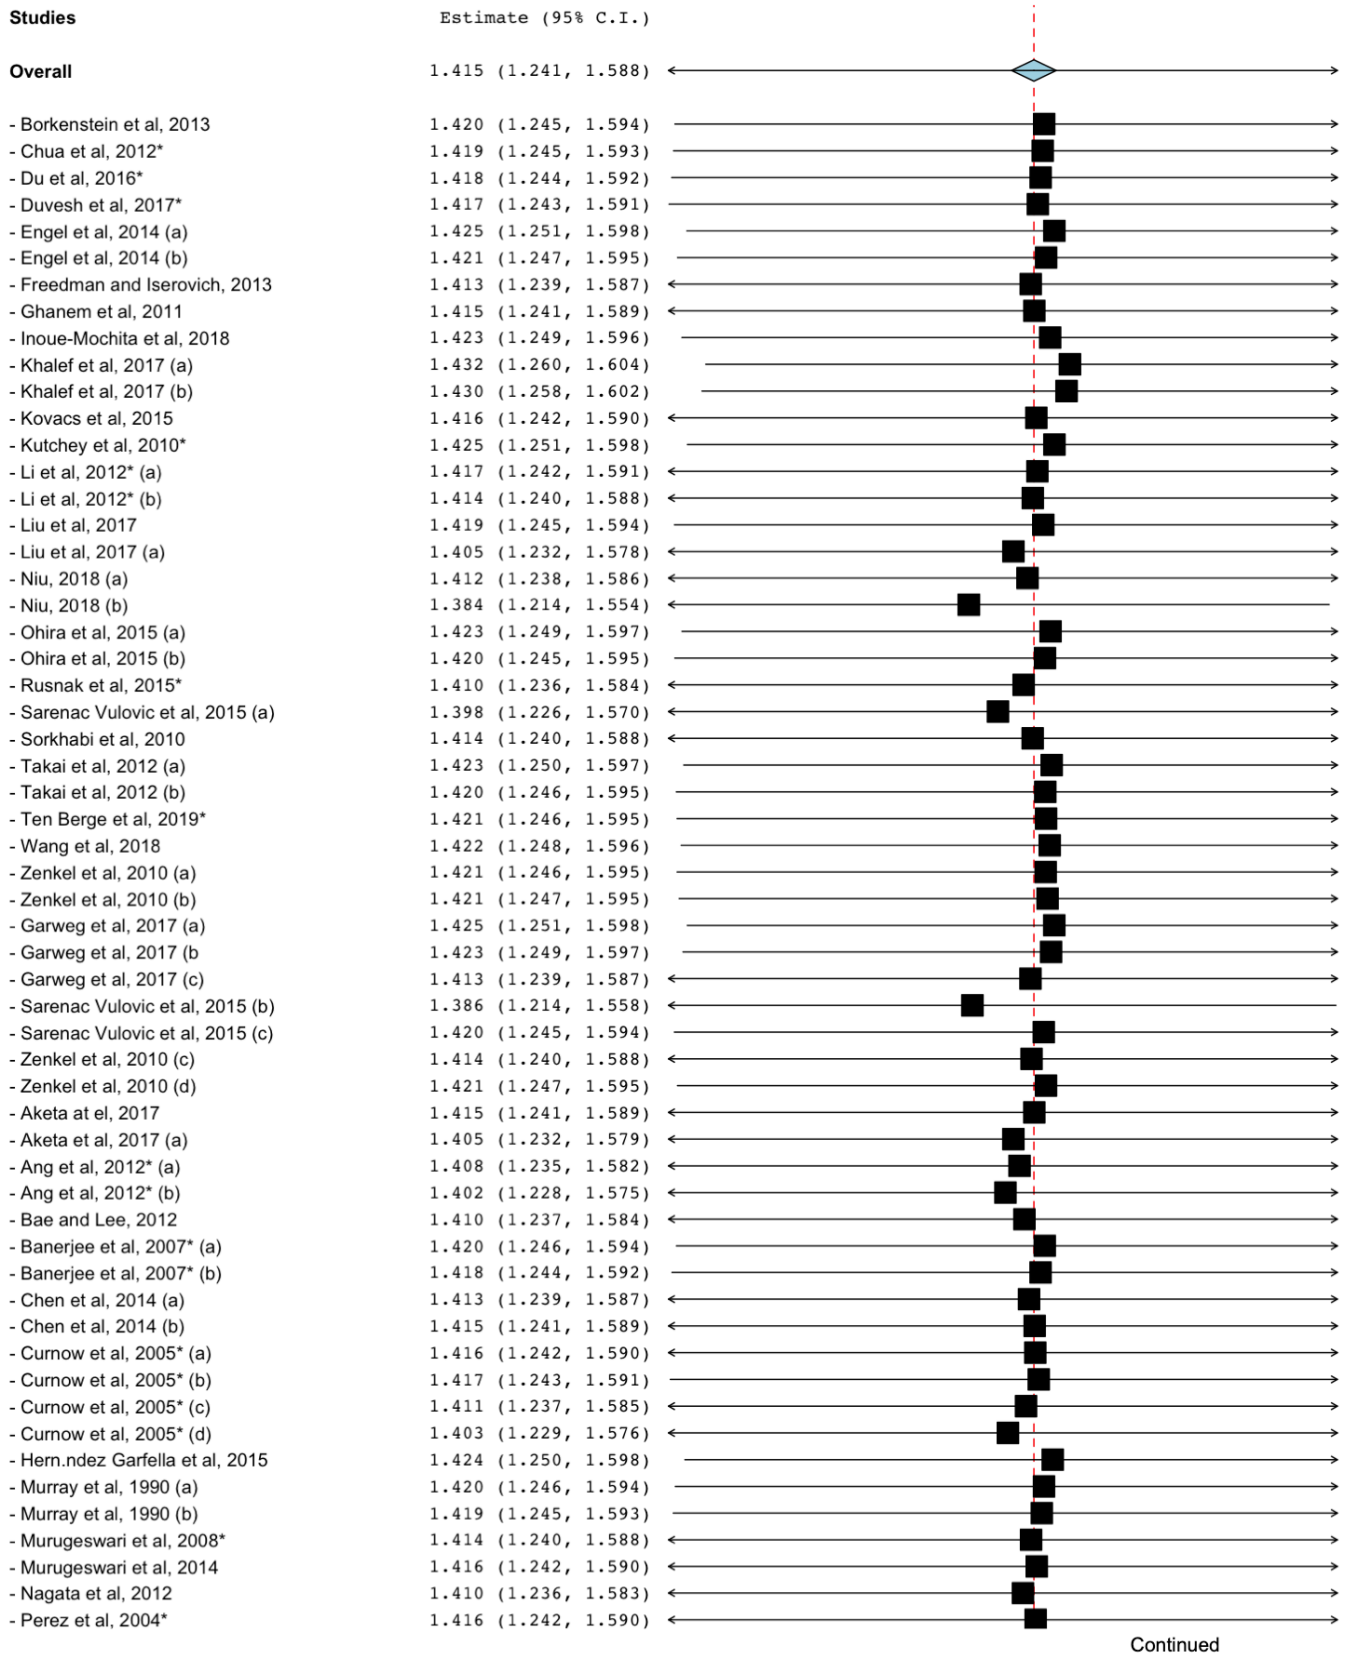

**Supplemental Figure S8.** A sensitivity analysis for intraocular IL-6 levels and ocular diseases.

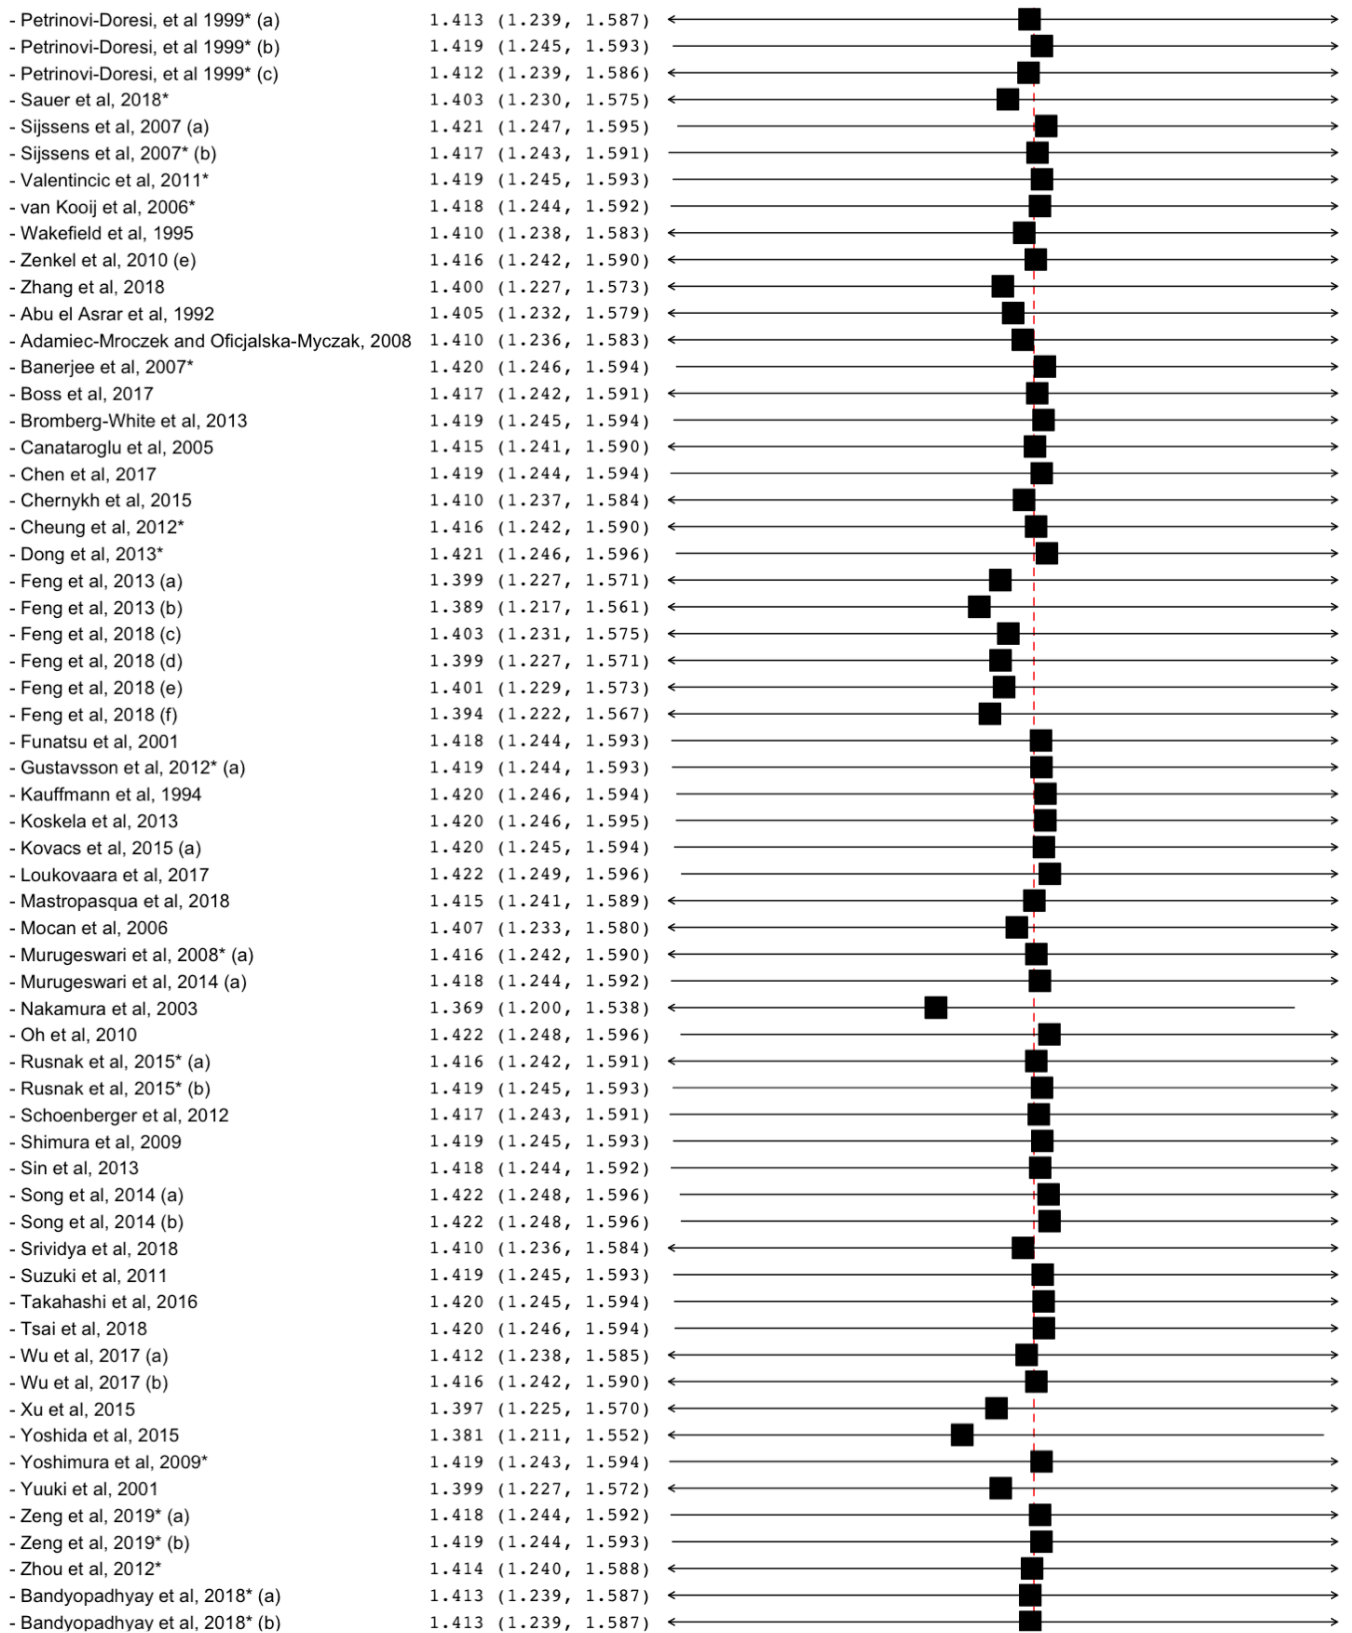

Continued

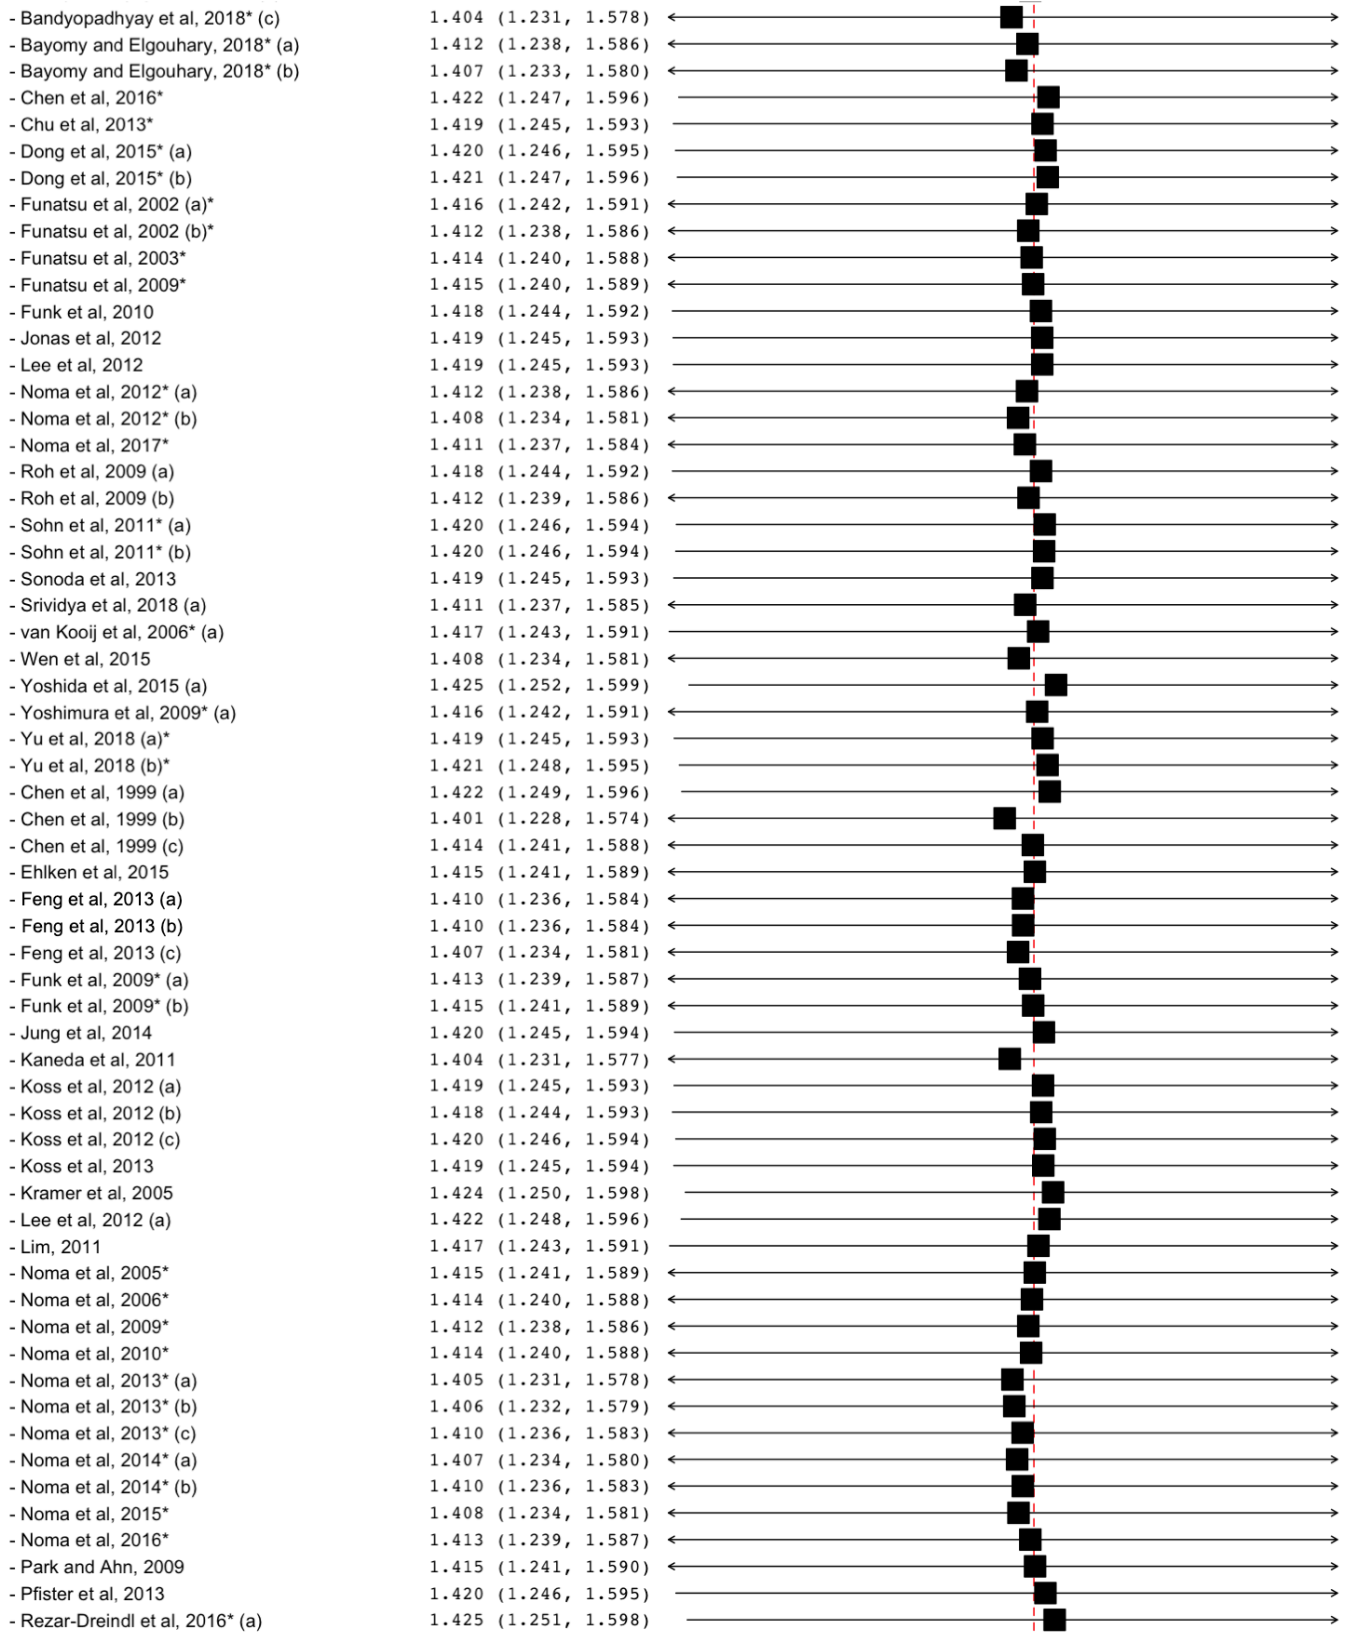

Continued

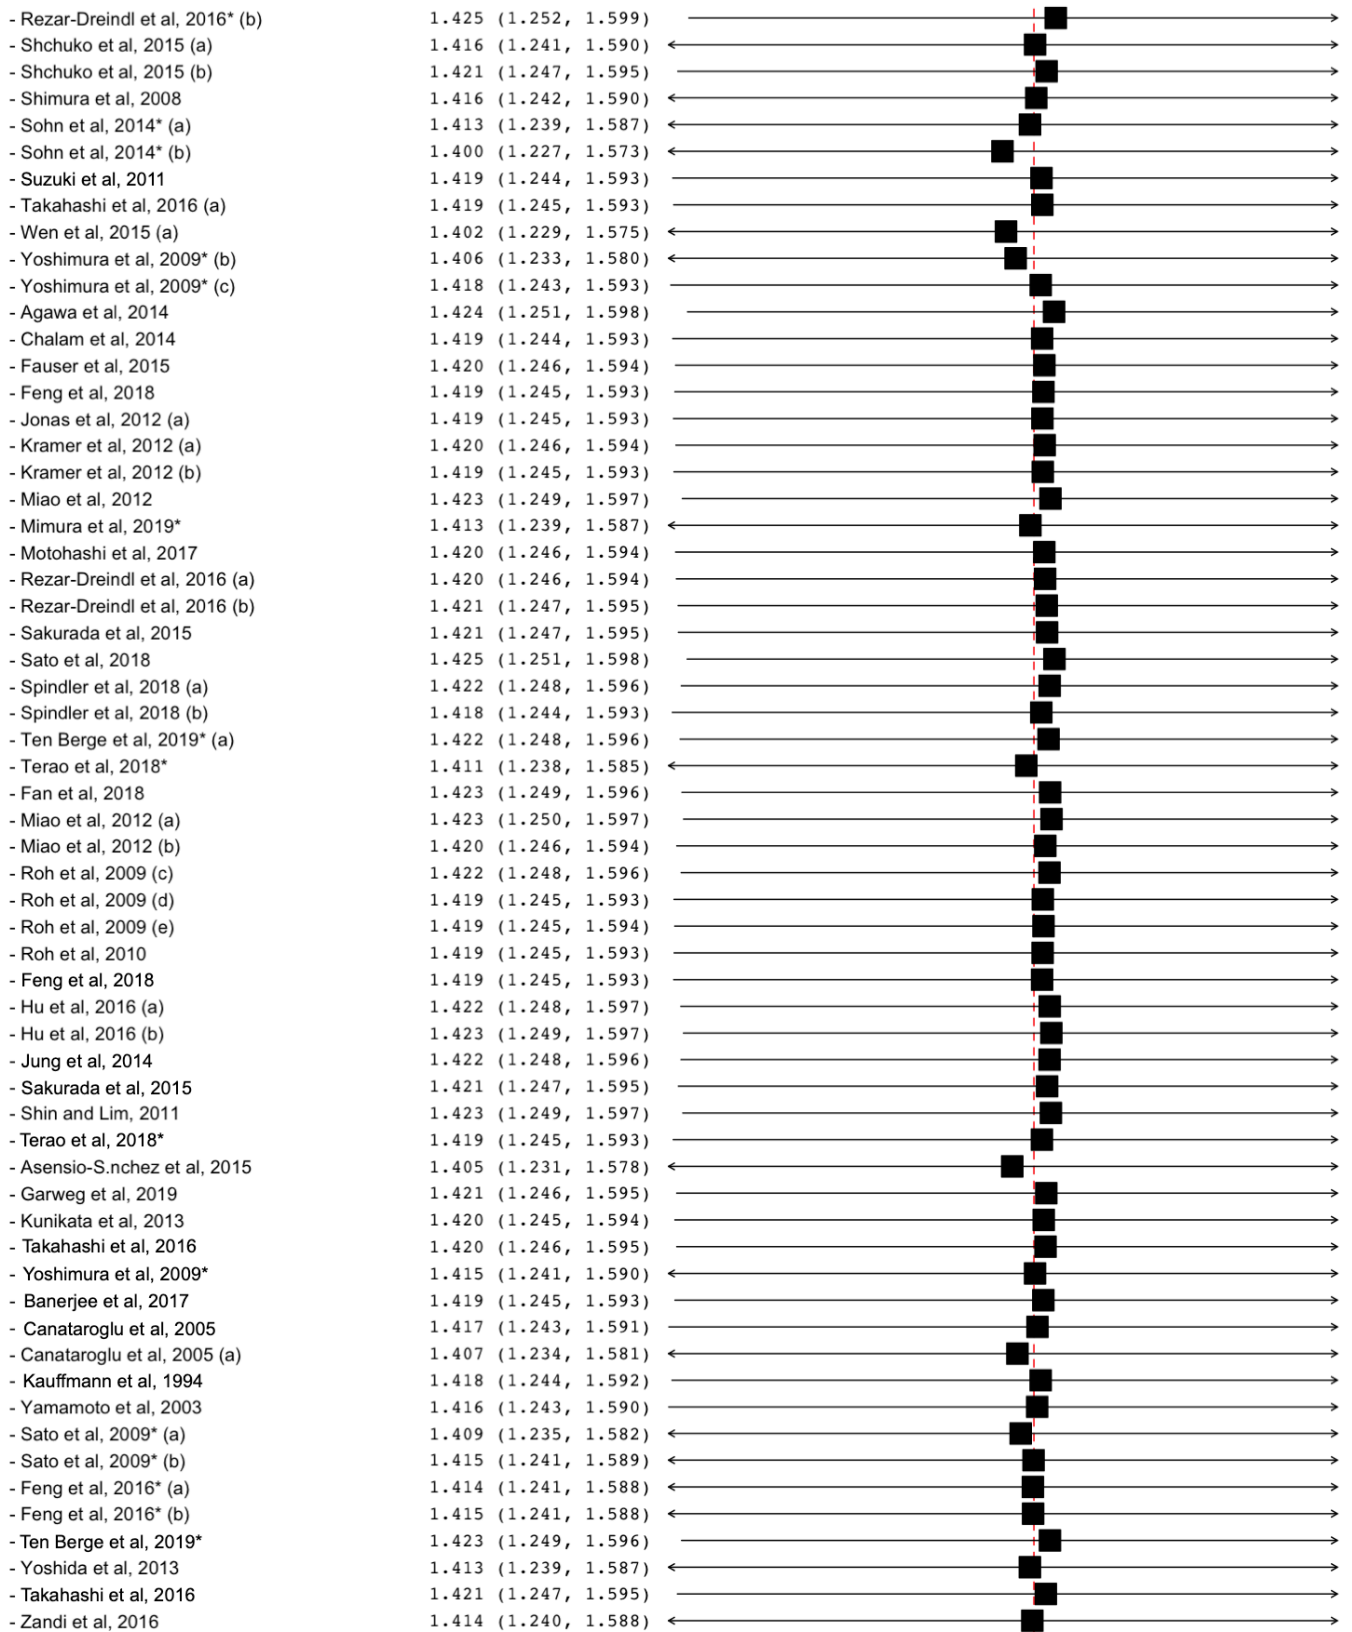

Continued

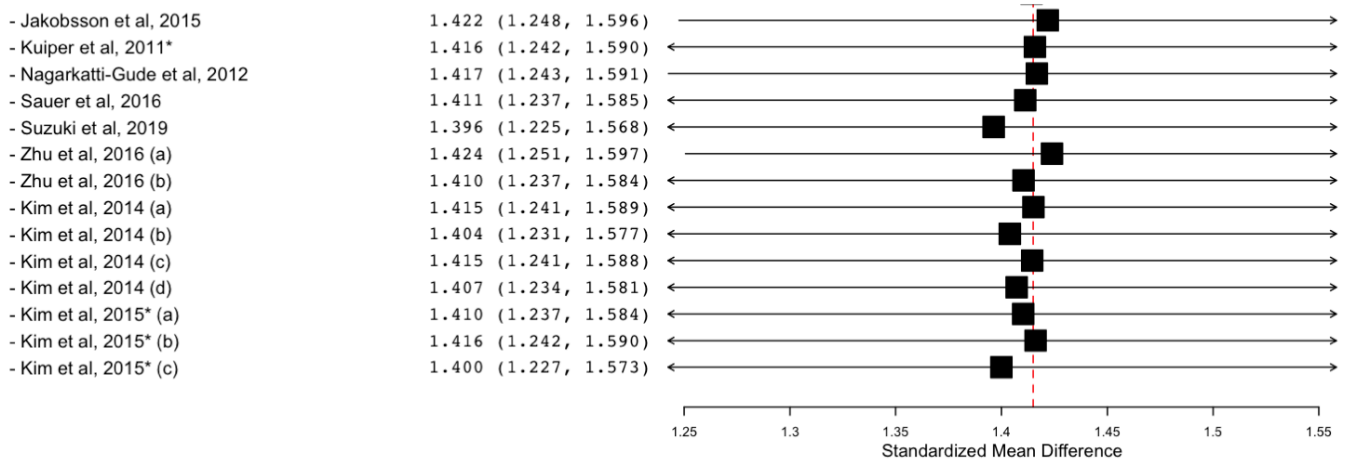

**Supplemental Figure S8.** A sensitivity analysis for intraocular IL-6 levels and ocular diseases.

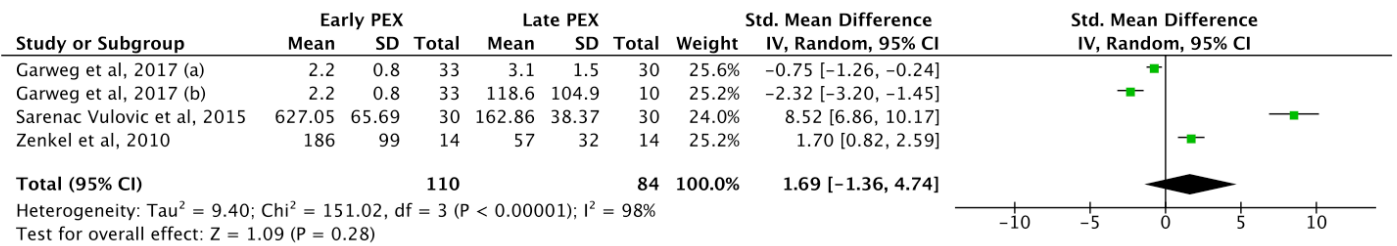

**Supplemental Figure S9.** Forest plot for pooled SMD and 95% CI for IL-6 levels between early and late PEX syndrome.

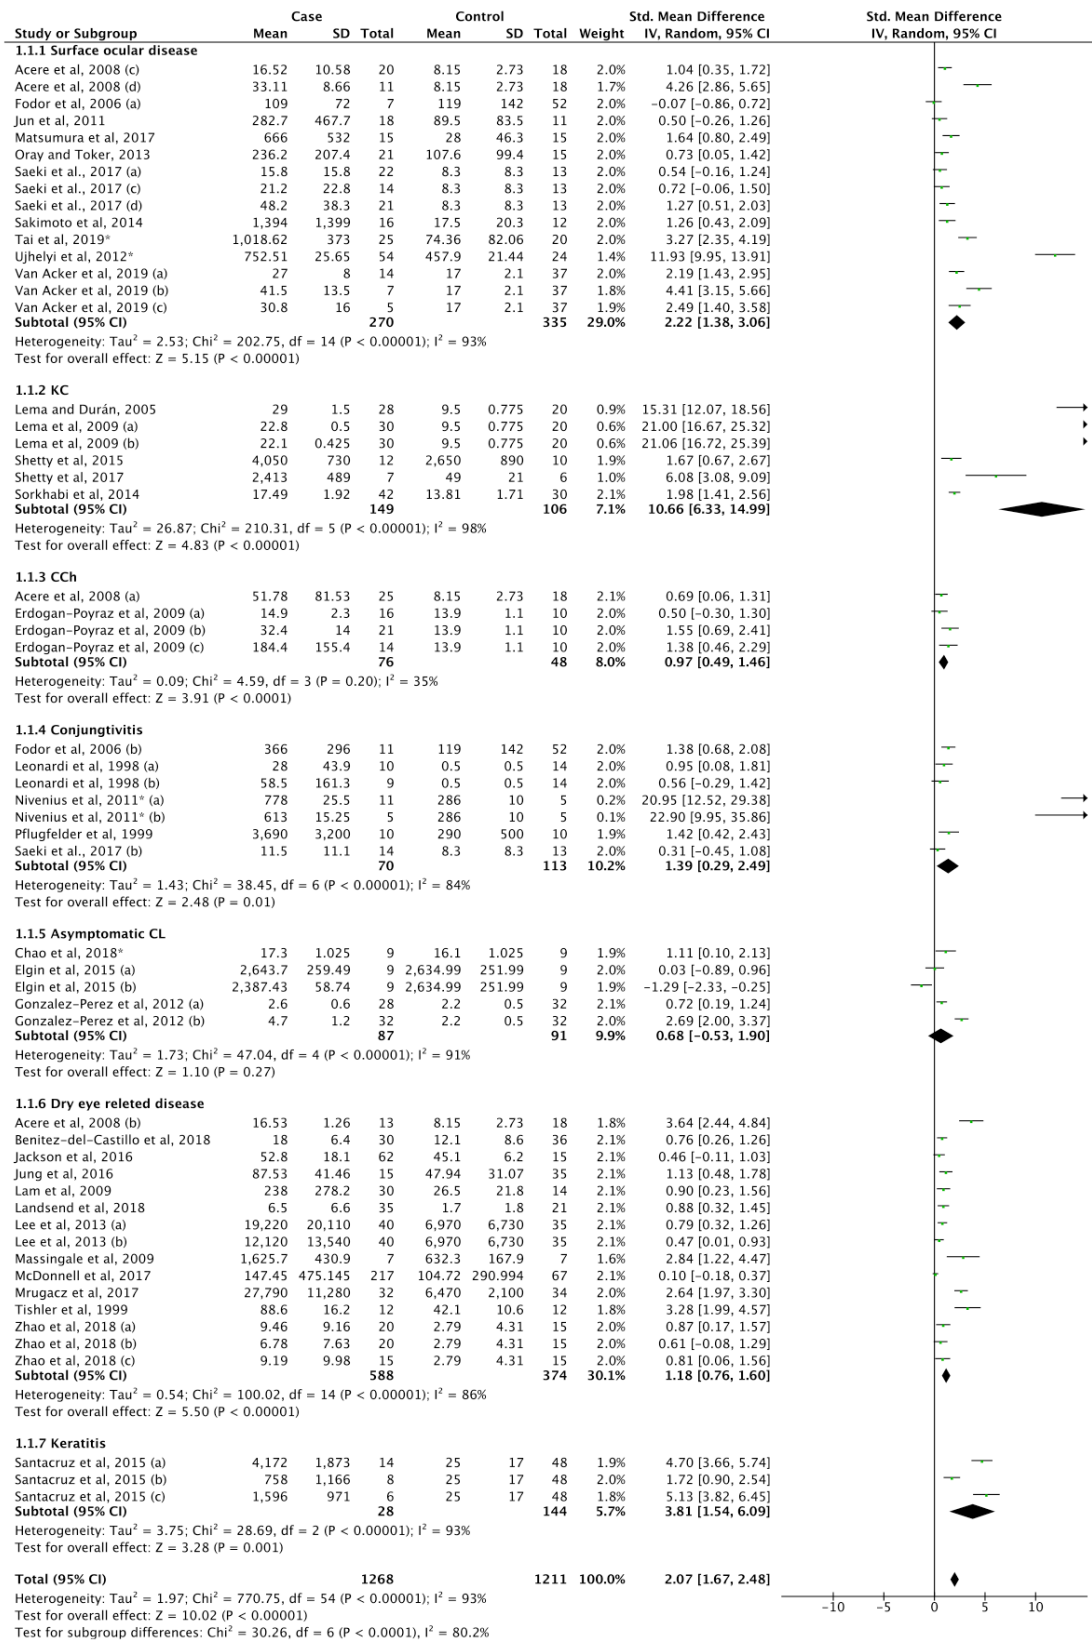

**Supplemental Figure S10.** Forest plot for pooled SMD and 95% CI for IL-6 levels between surface ocular disease and control.

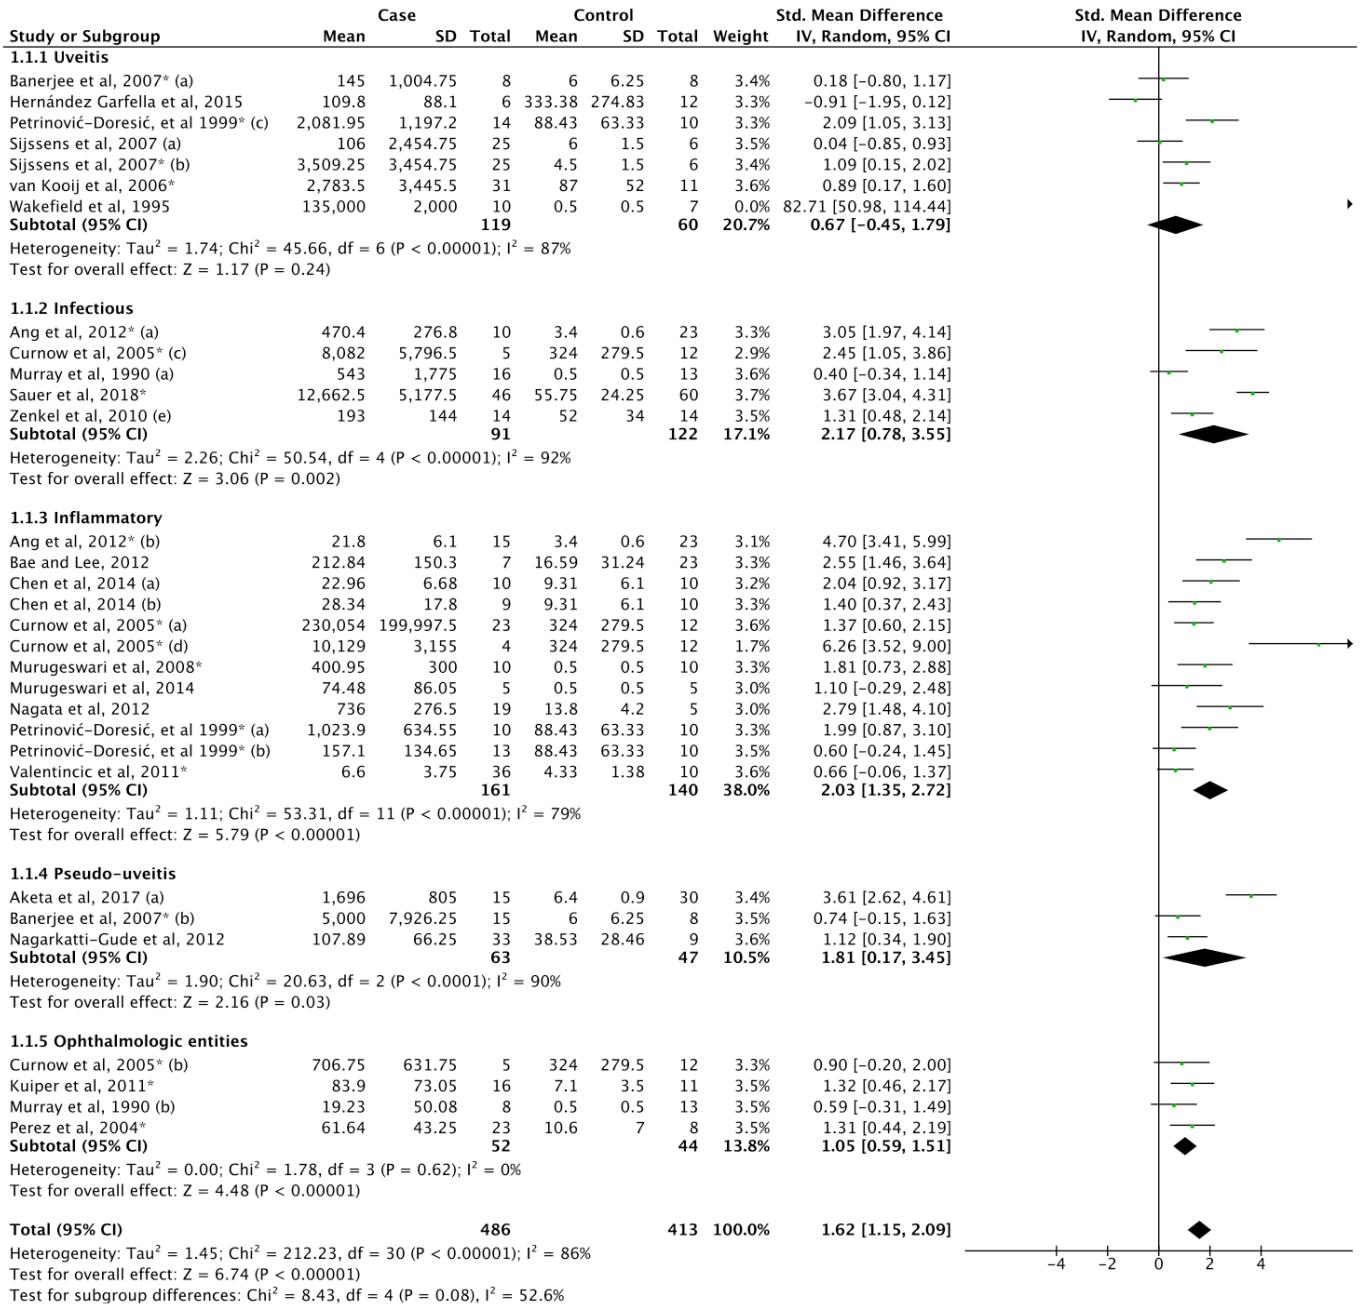

**Supplemental Figure S11.** Forest plot for pooled SMD and 95% CI for IL-6 levels between intraocular inflammation (uveitis) and control. Note: 1.1.1, unclassified uveitis subtype (refer to the Supplemental Table S4 (4b1)).



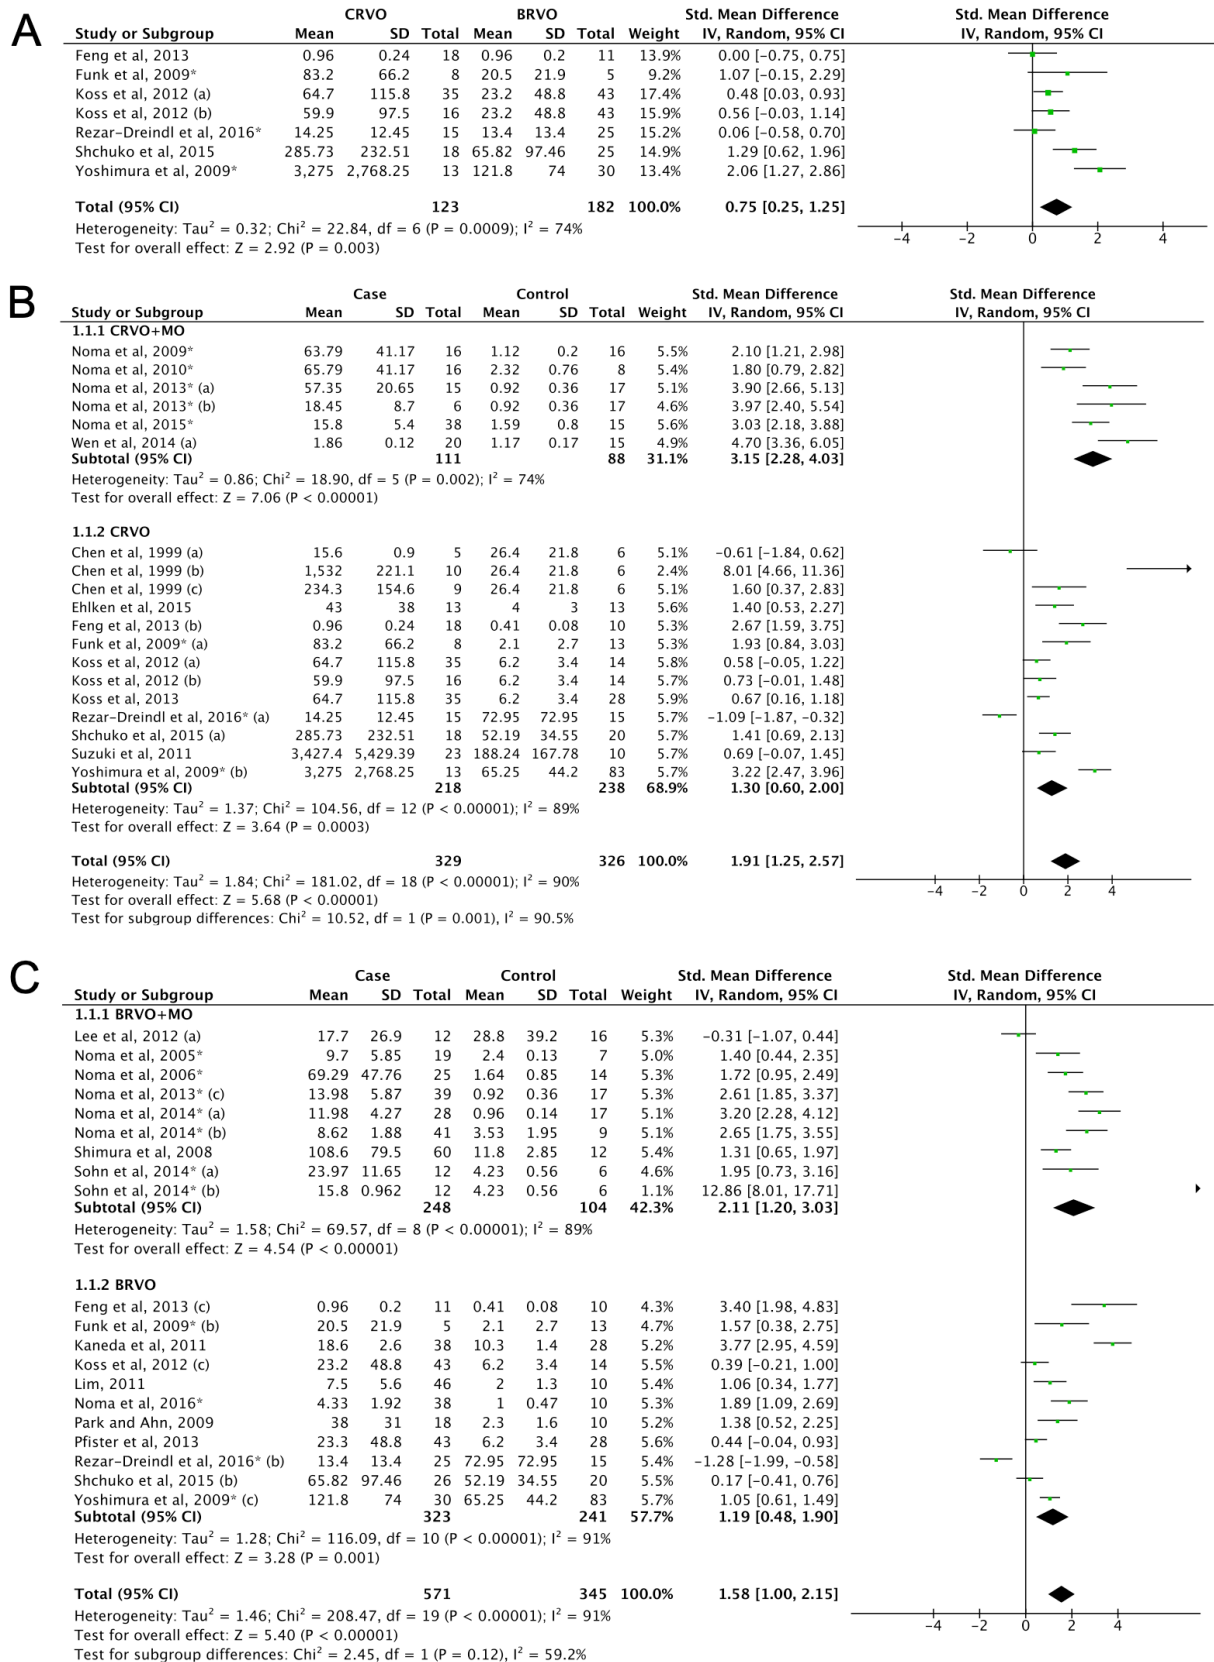

**Supplemental Figure S12. (A)** Forest plot for pooled SMD and 95% CI for IL-6 levels between CRVO and BRVO; **(B)** Forest plot for pooled SMD and 95% CI for IL-6 levels between CRVO and CRVO+MO; **(C)** Forest plot for pooled SMD and 95% CI for IL-6 levels between BRVO and BRVO+MO.

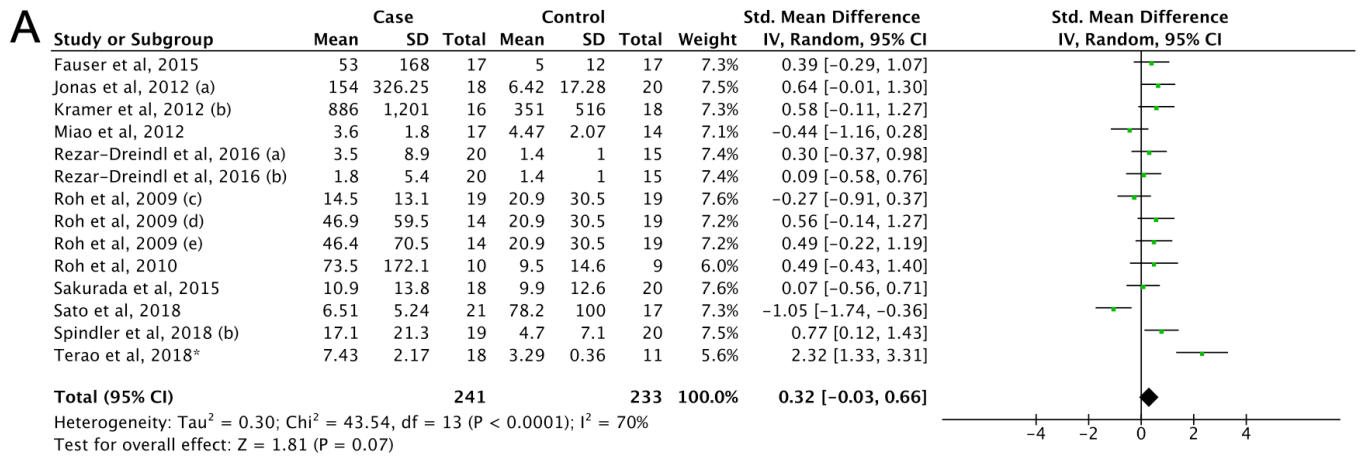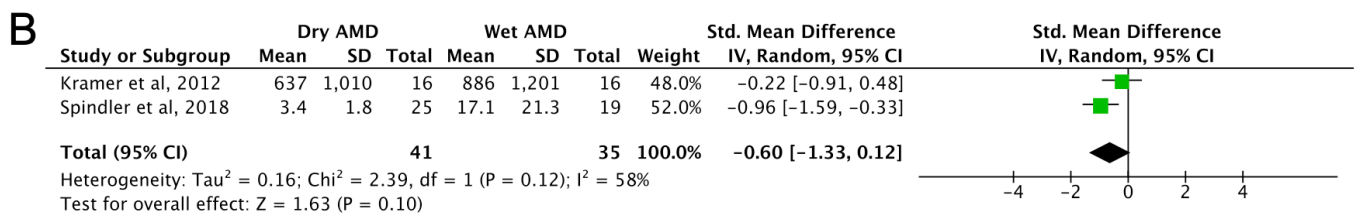

**Supplemental Figure S13. (A)** Forest plot for pooled SMD and 95% CI for IL-6 levels between AMD and control; **(B)** Forest plot for pooled SMD and 95% CI for IL-6 levels between dry and wet AMD.
